# Supplementary material for: Three-Year Overall Survival Outcomes and Correlative Analyses in Patients With NSCLC and High (50%–89%) Versus Very High (≥90%) Programmed Death-Ligand 1 Expression Treated With First-Line Pembrolizumab or Cemiplimab
Source: PubMed Central journal article supplement (PMC11471150; doi:10.1016/j.jtocrr.2024.100675), 2024-04-12
Supplement: mmc1.pdf [file mmc1.pdf]

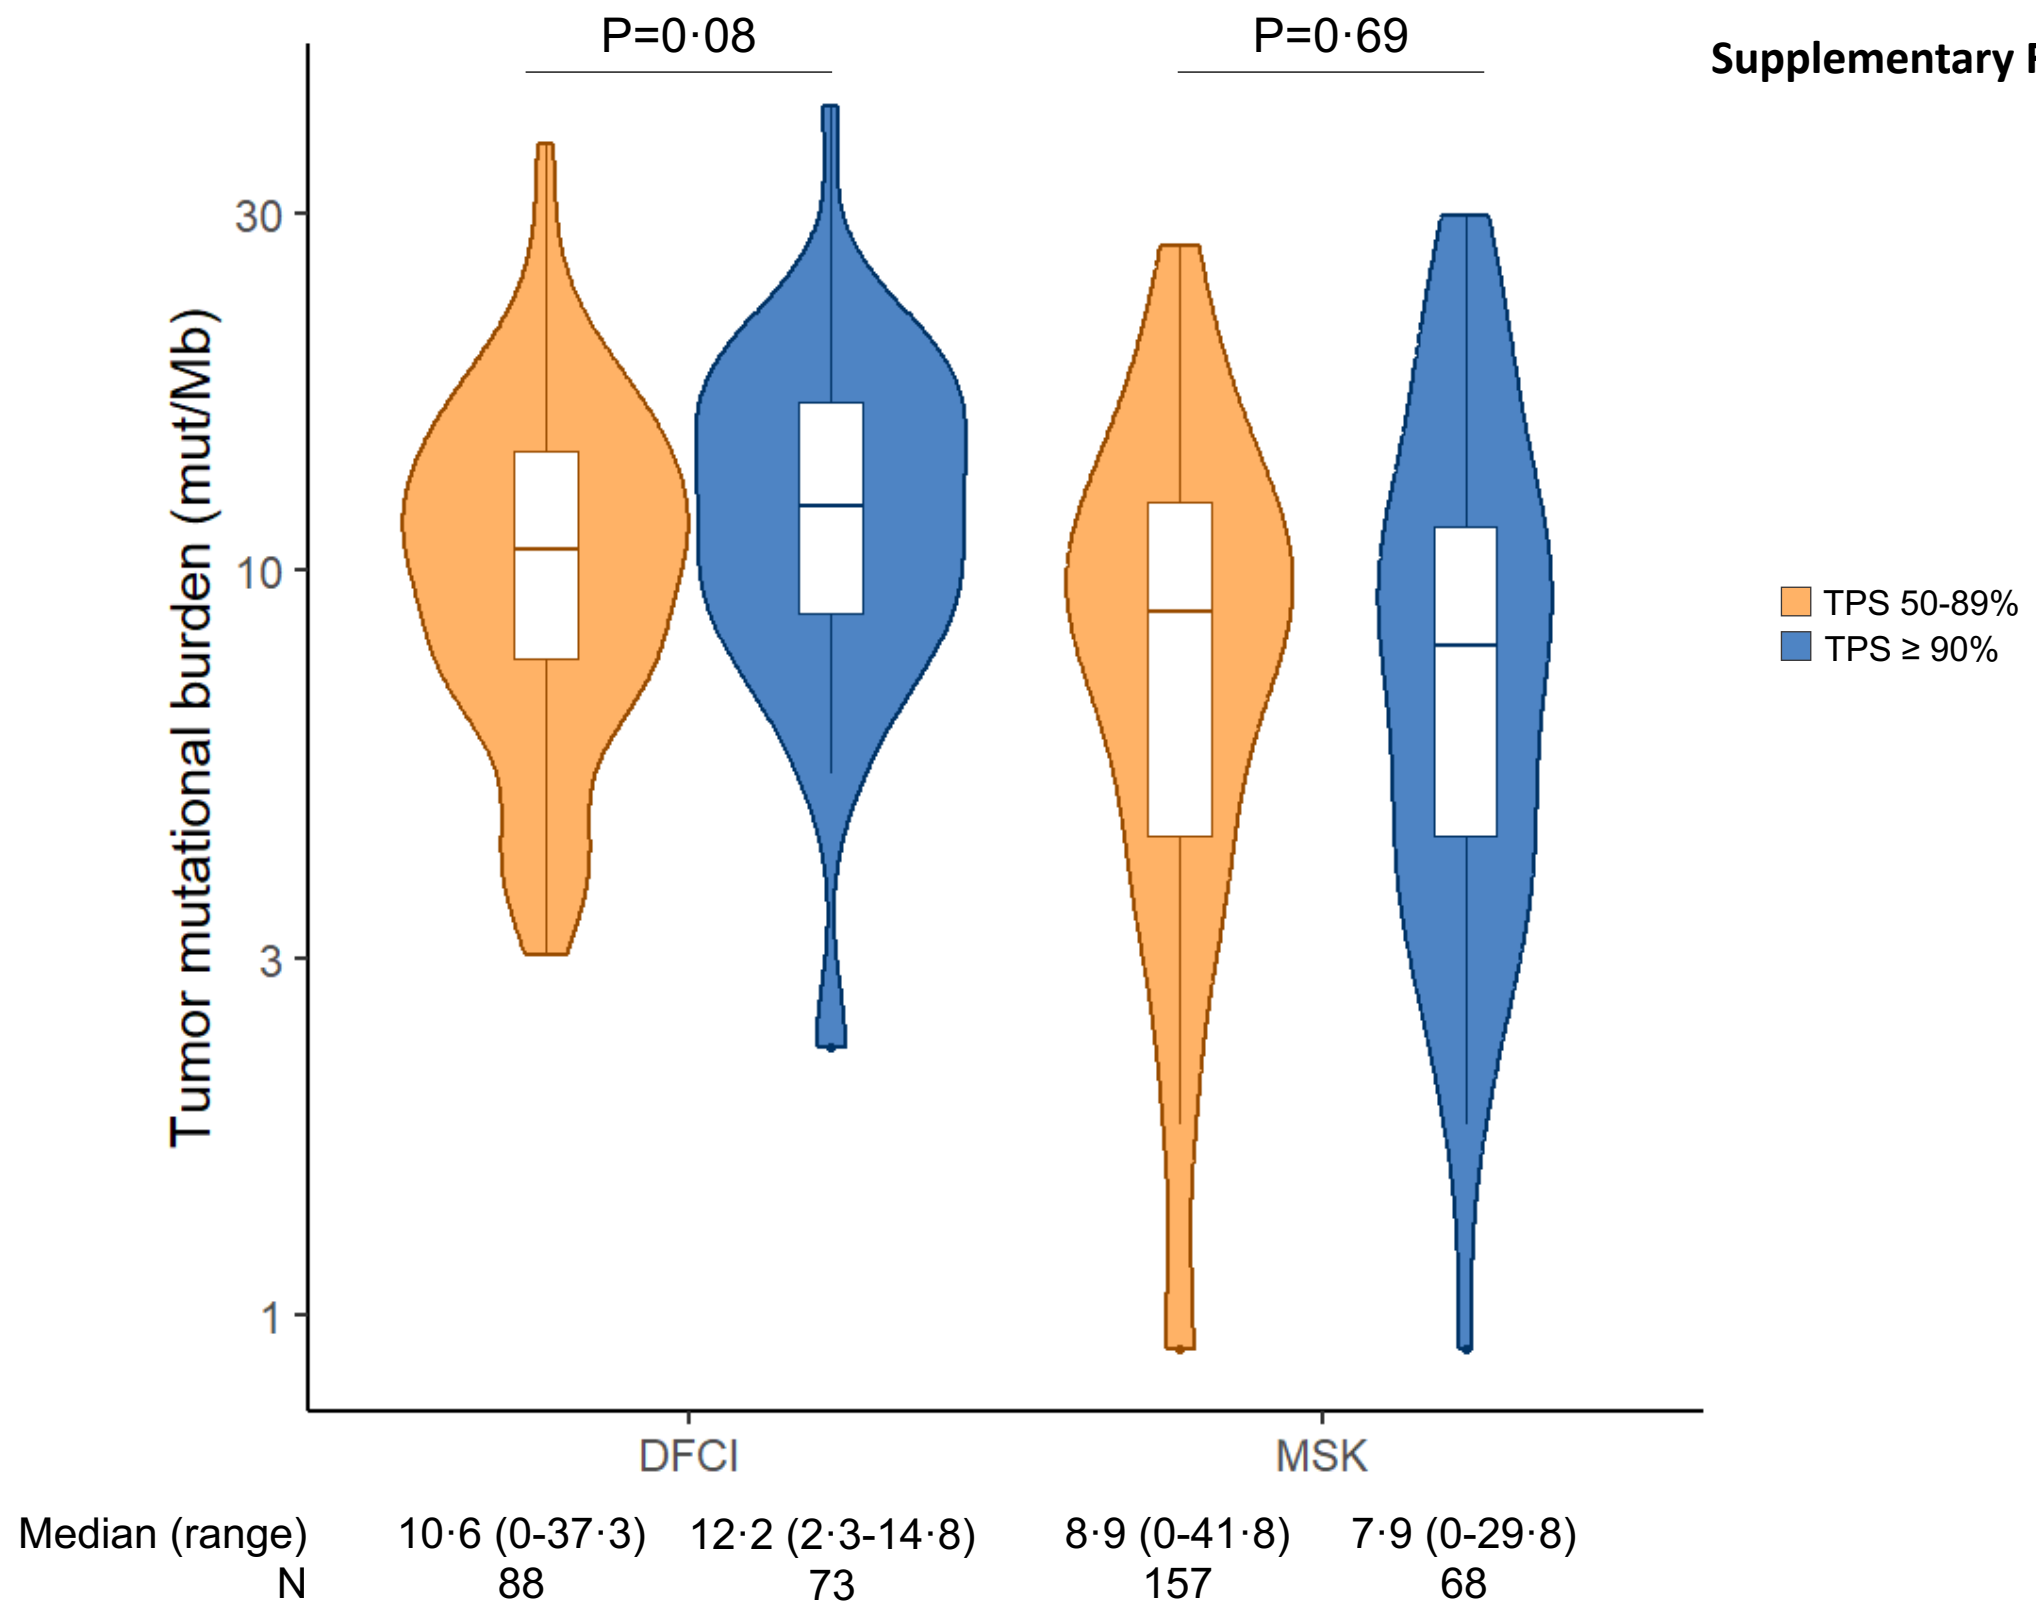

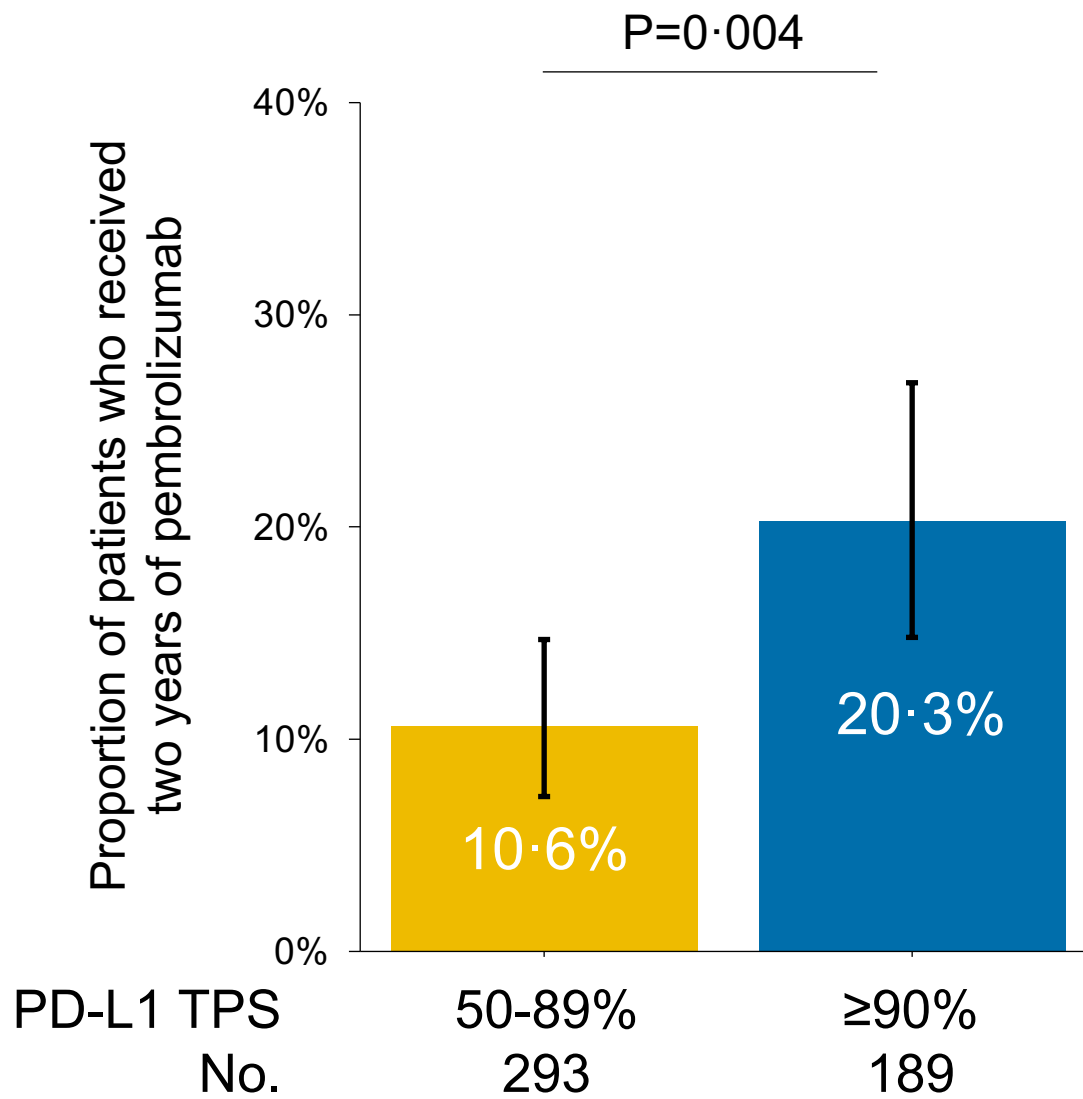

Supplementary Figure 2

# A Progression-free survival to pembrolizumab

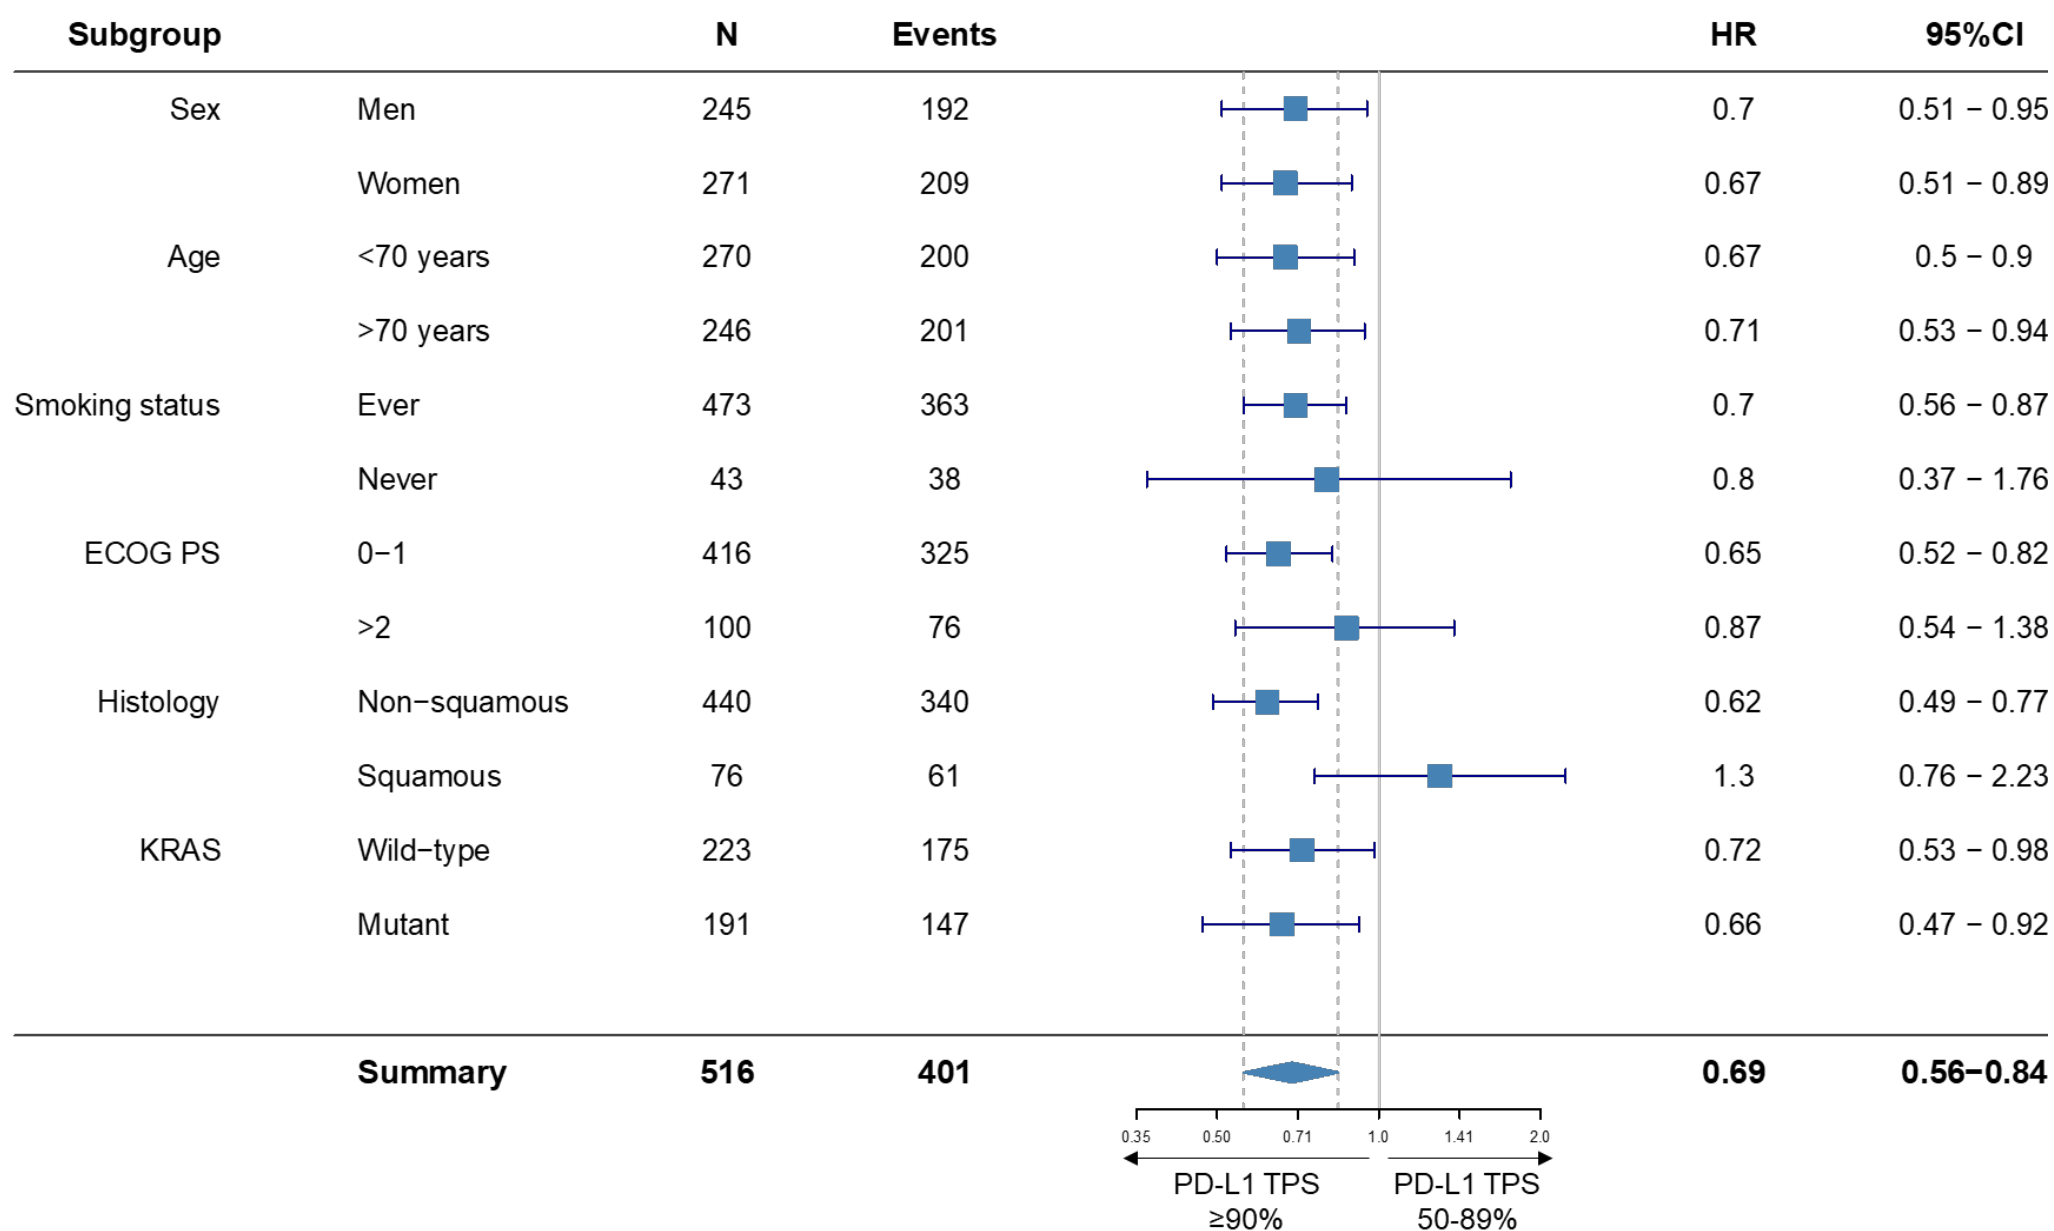

# B Overall survival to pembrolizumab

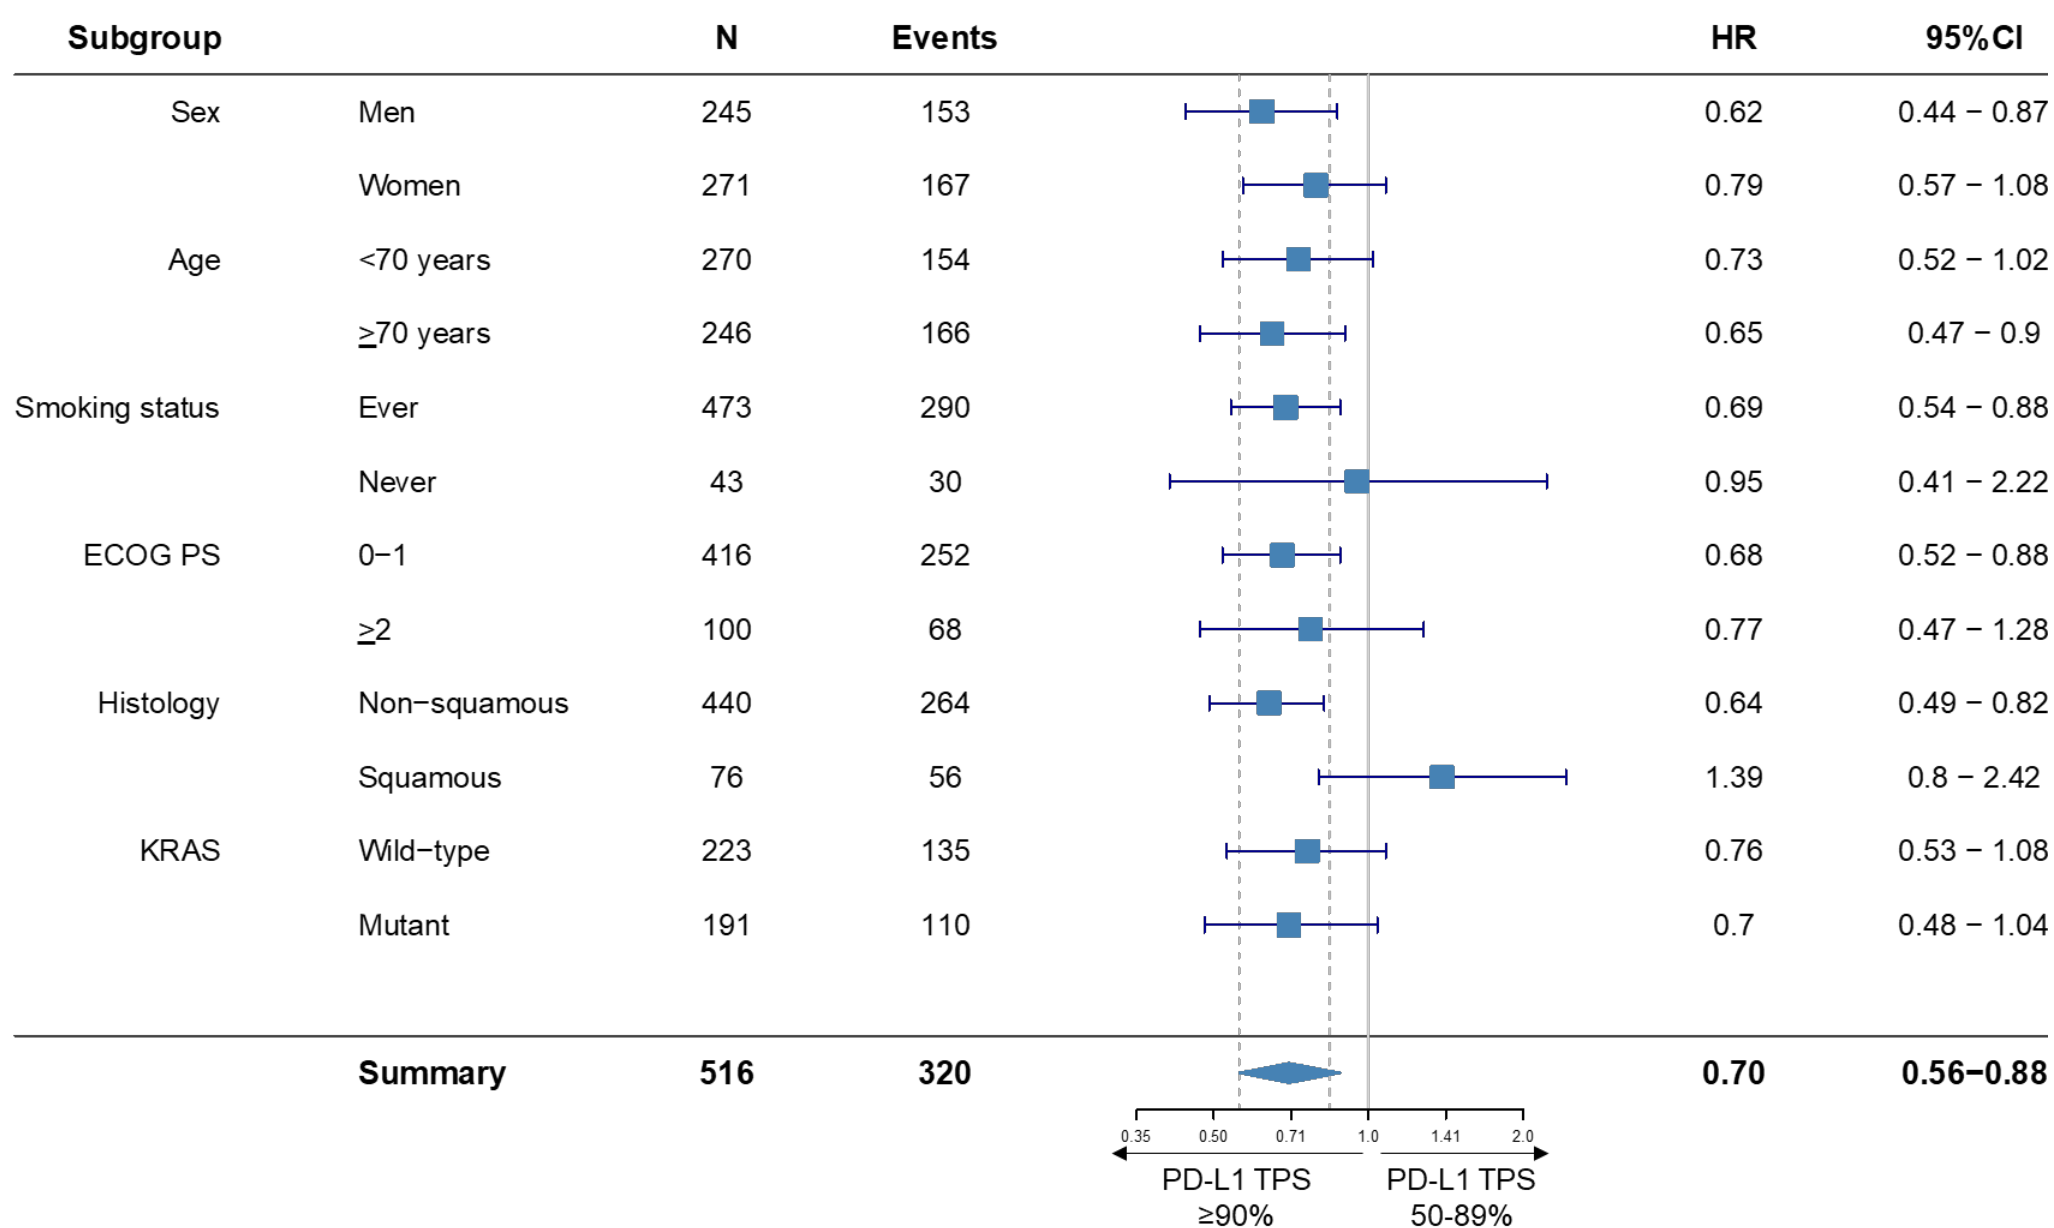

**A**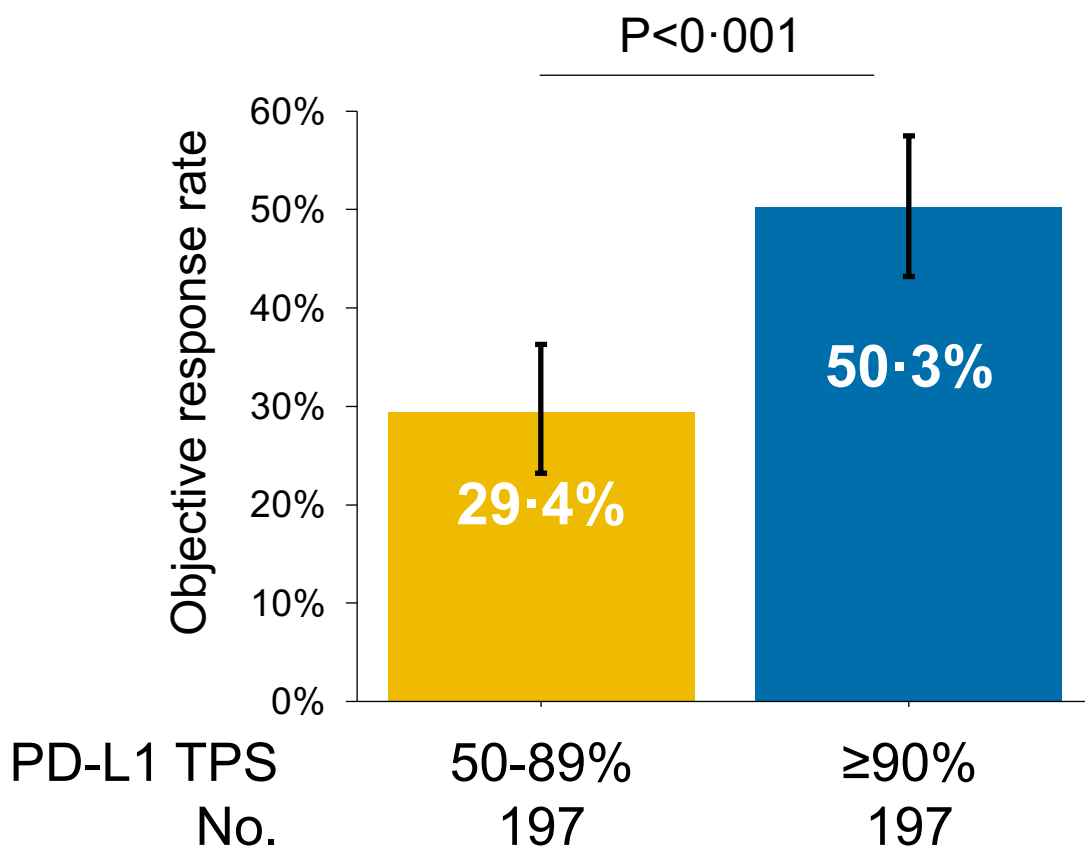**B**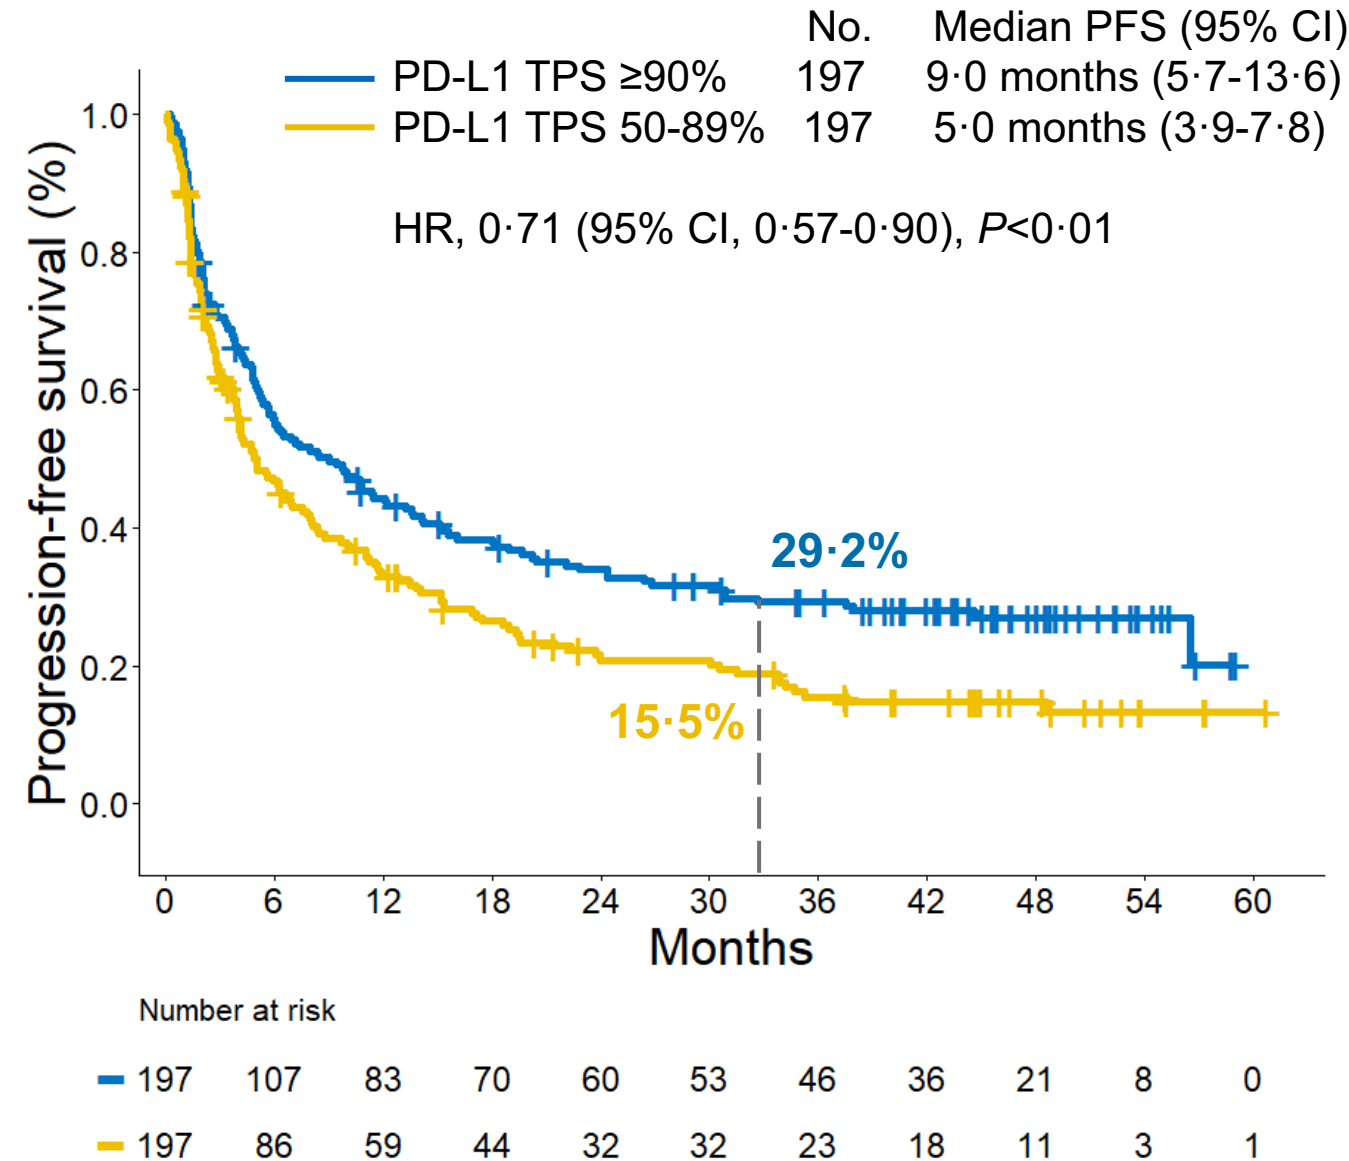**C**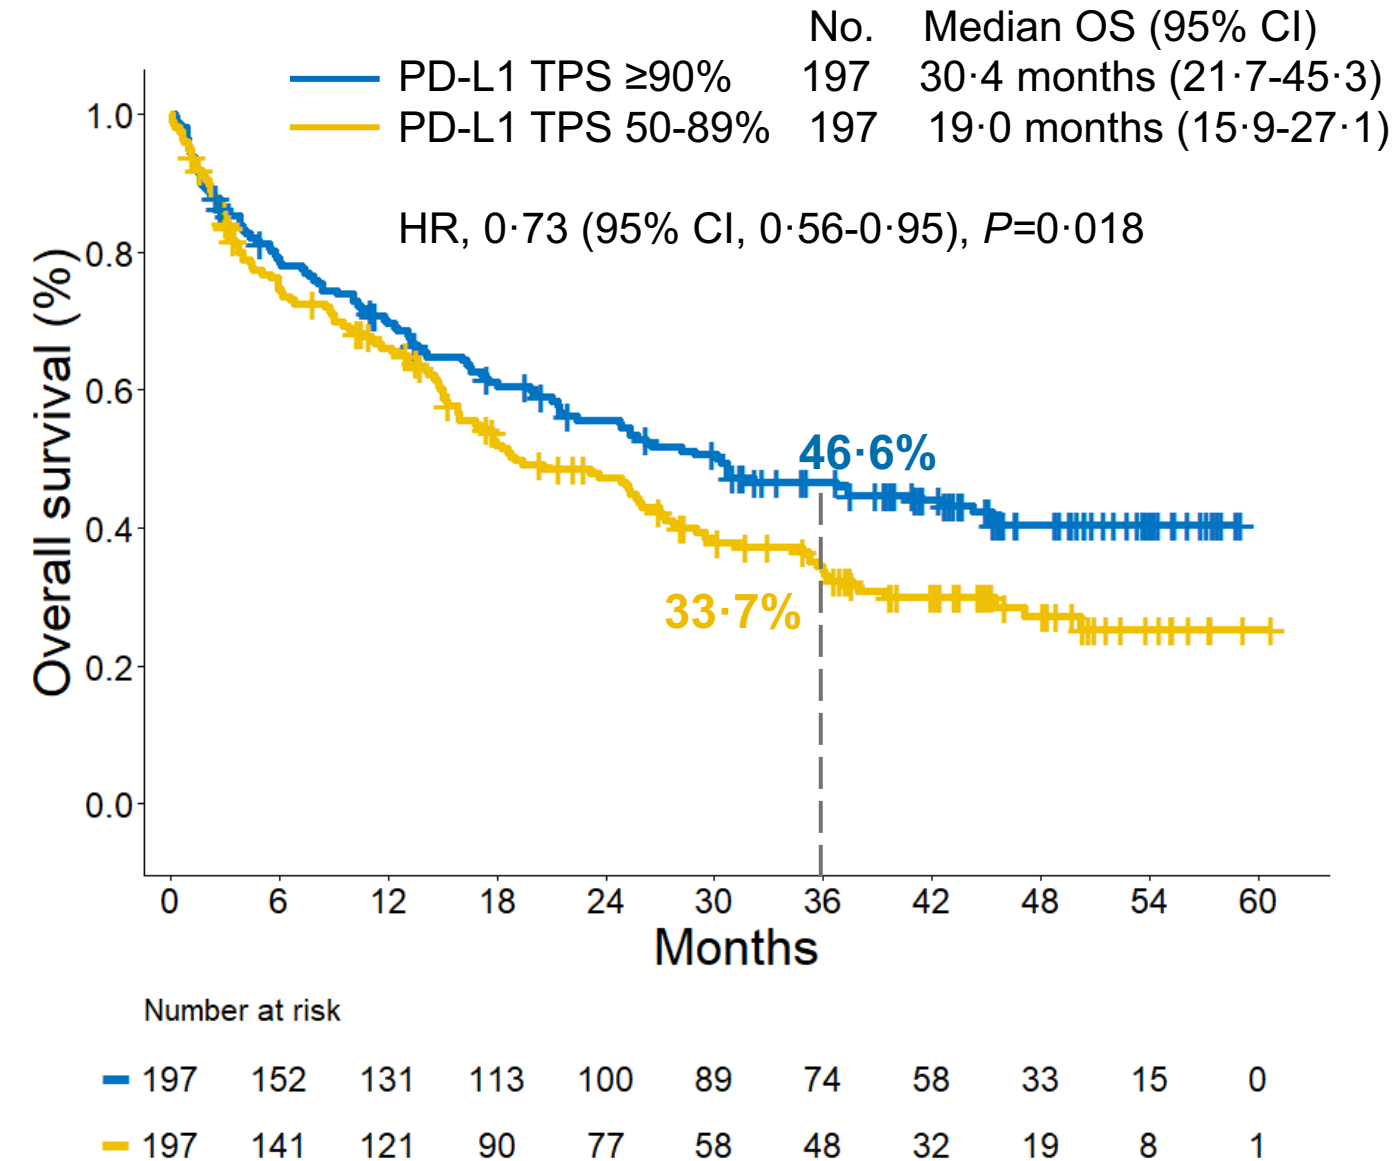

## A Progression-free survival to cemiplimab

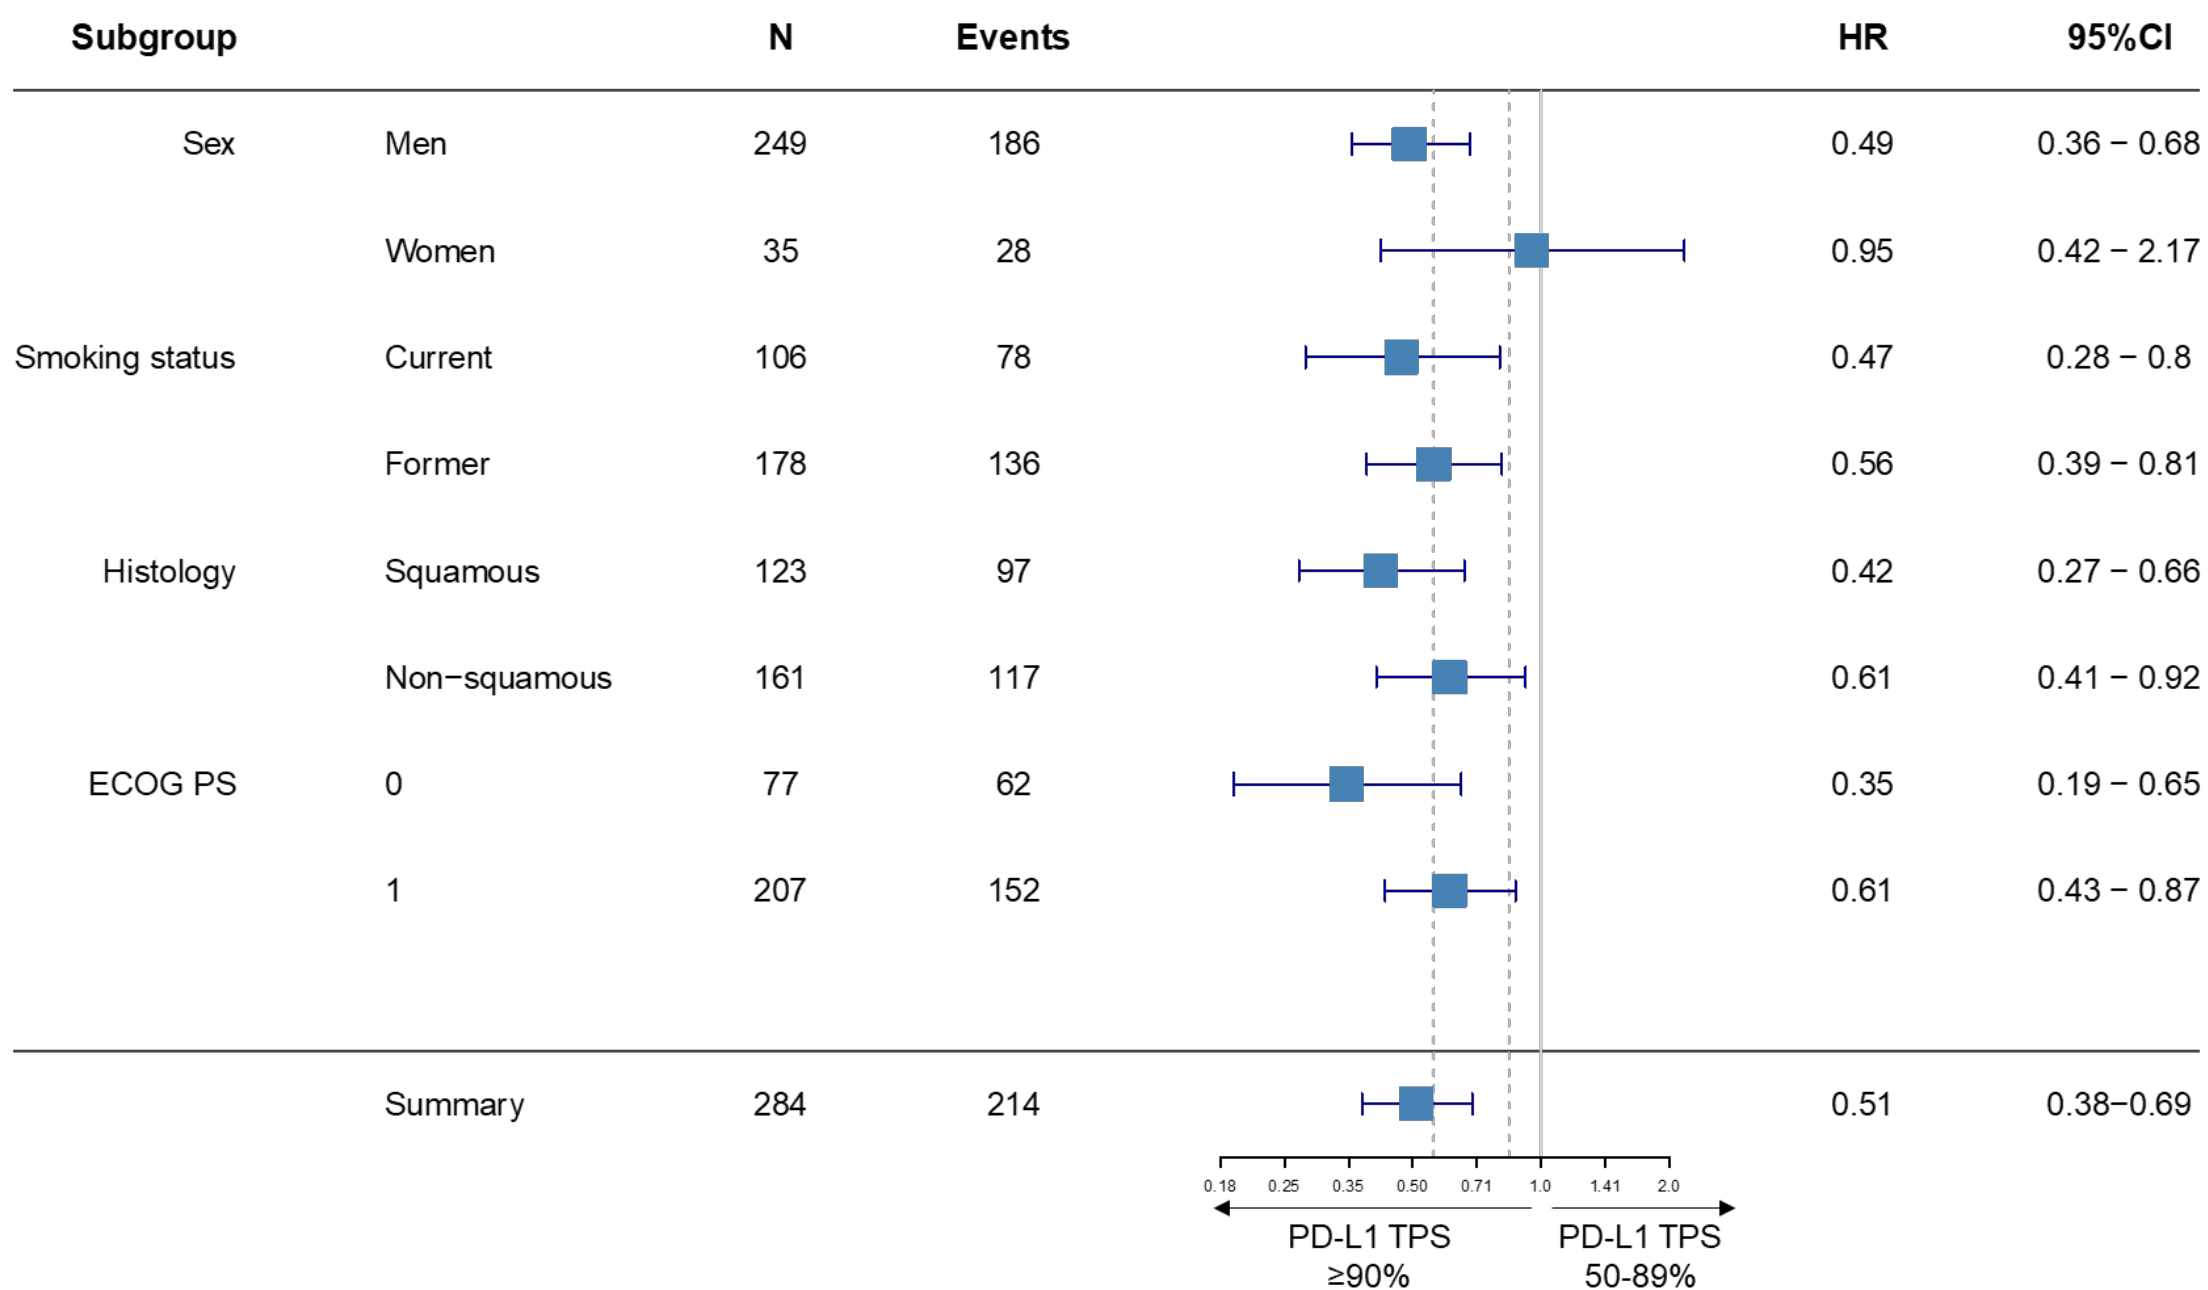

## B Overall survival to cemiplimab

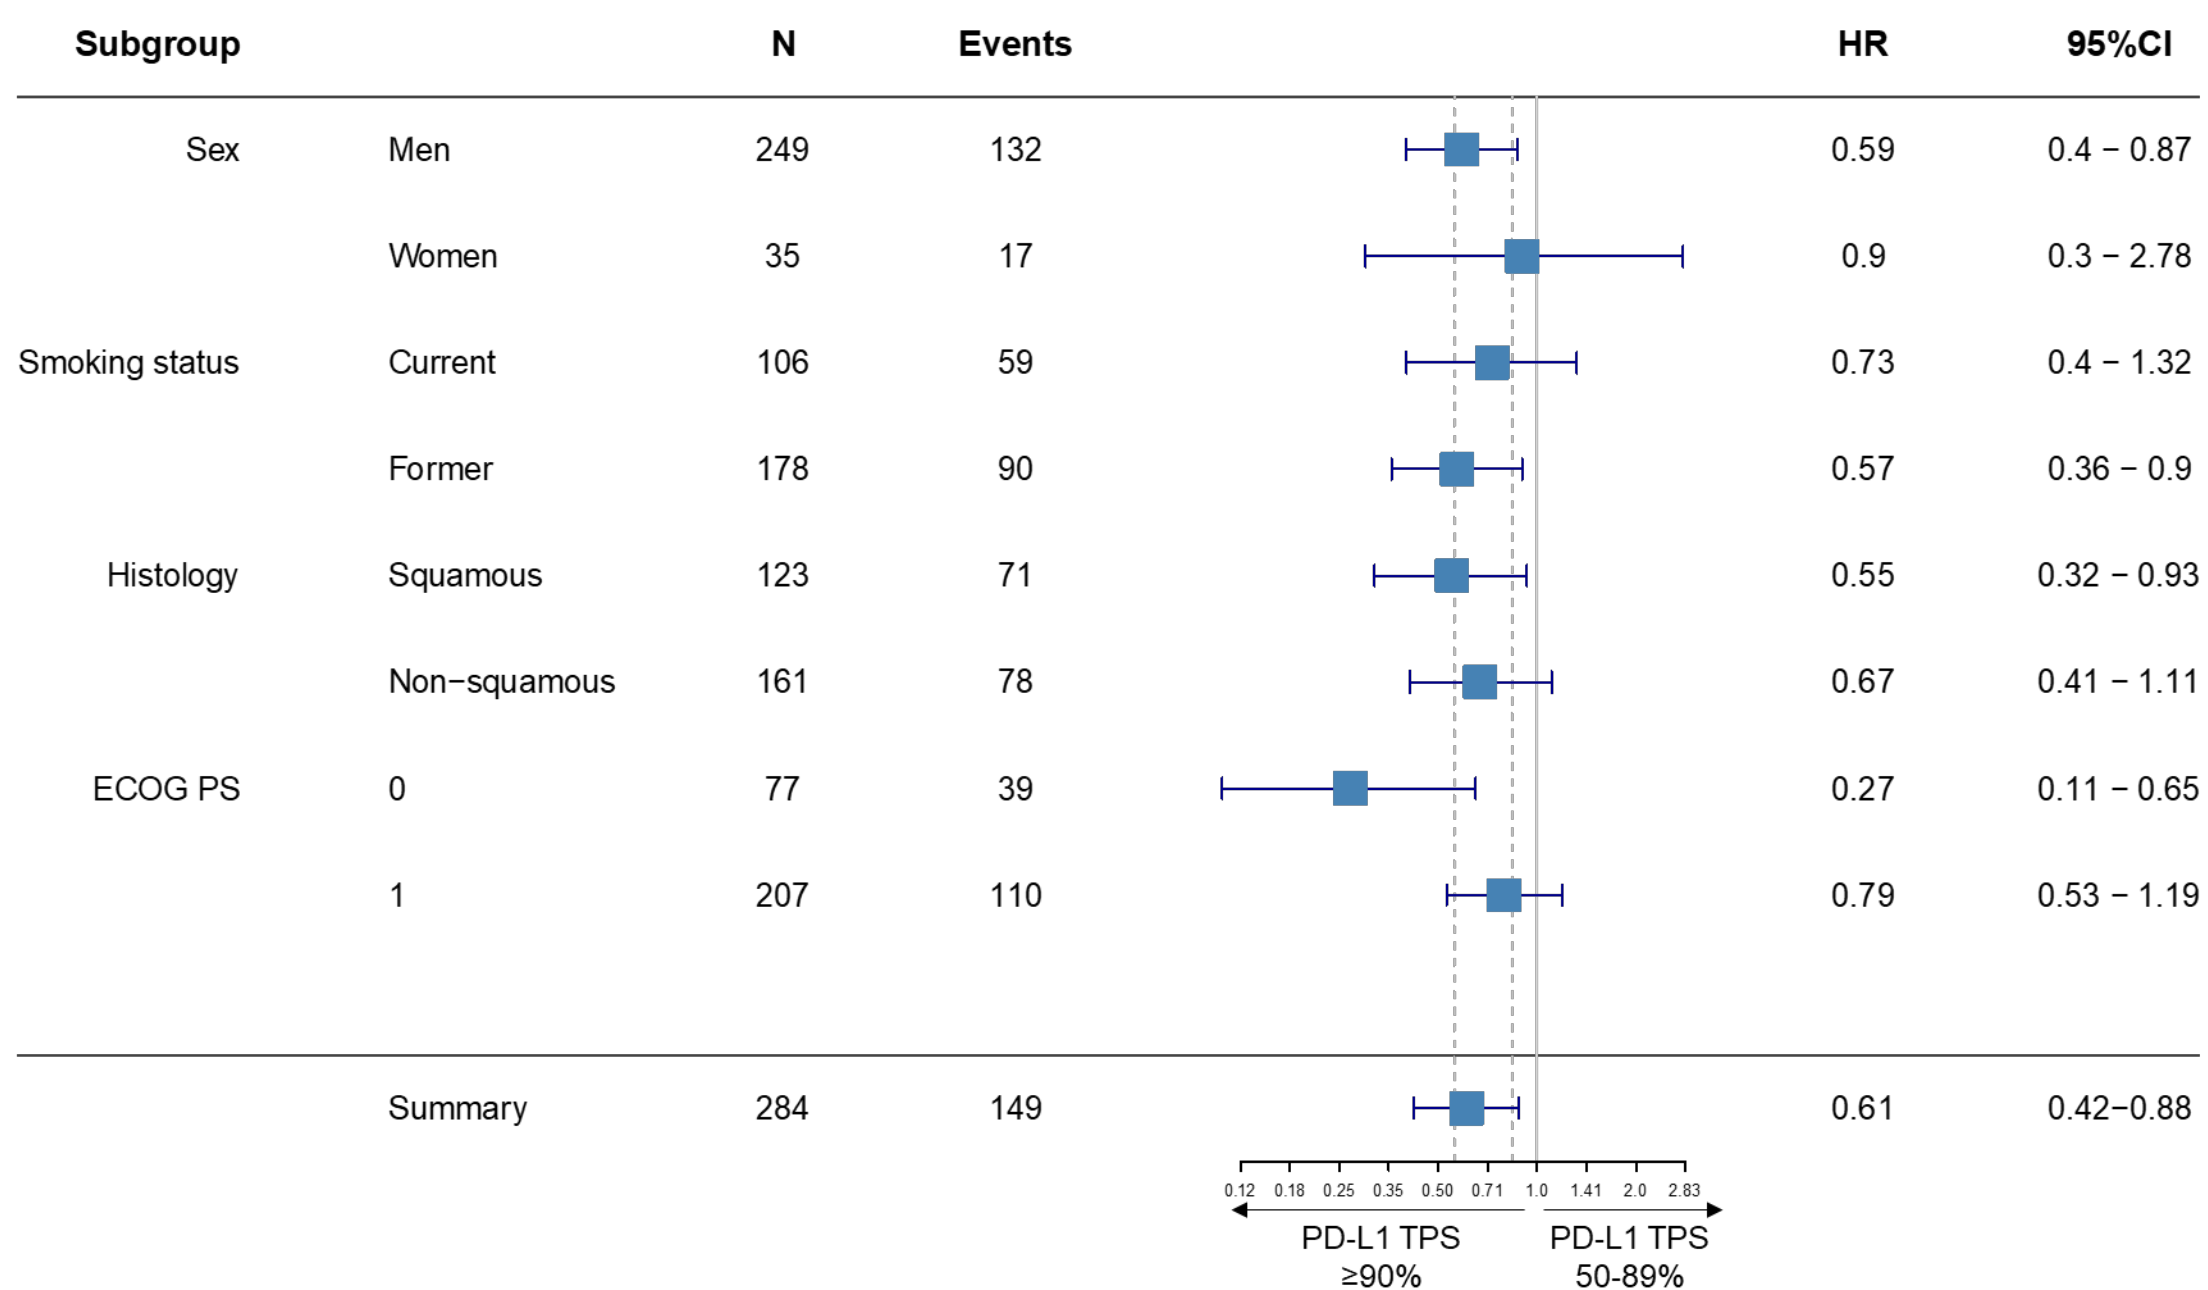

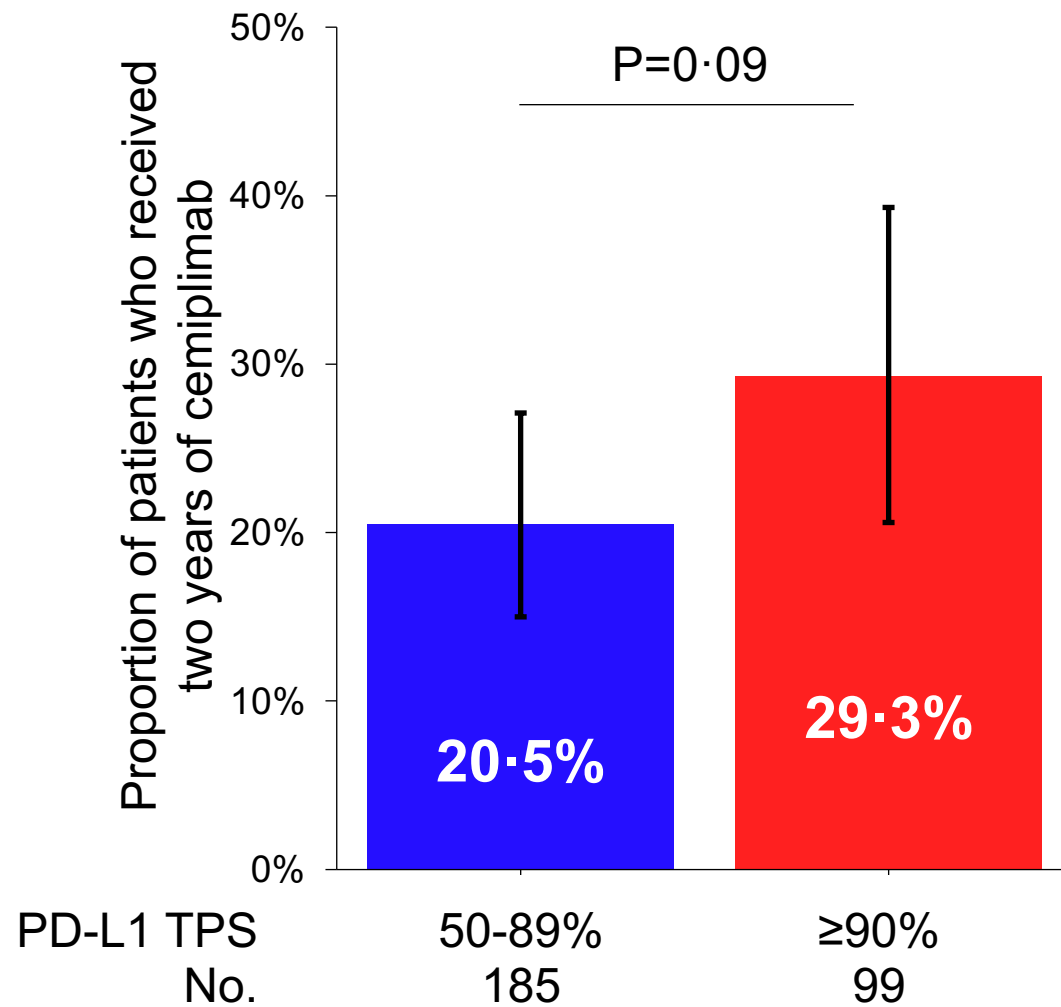

Supplementary Figure 6

# A Progression-free survival to chemotherapy

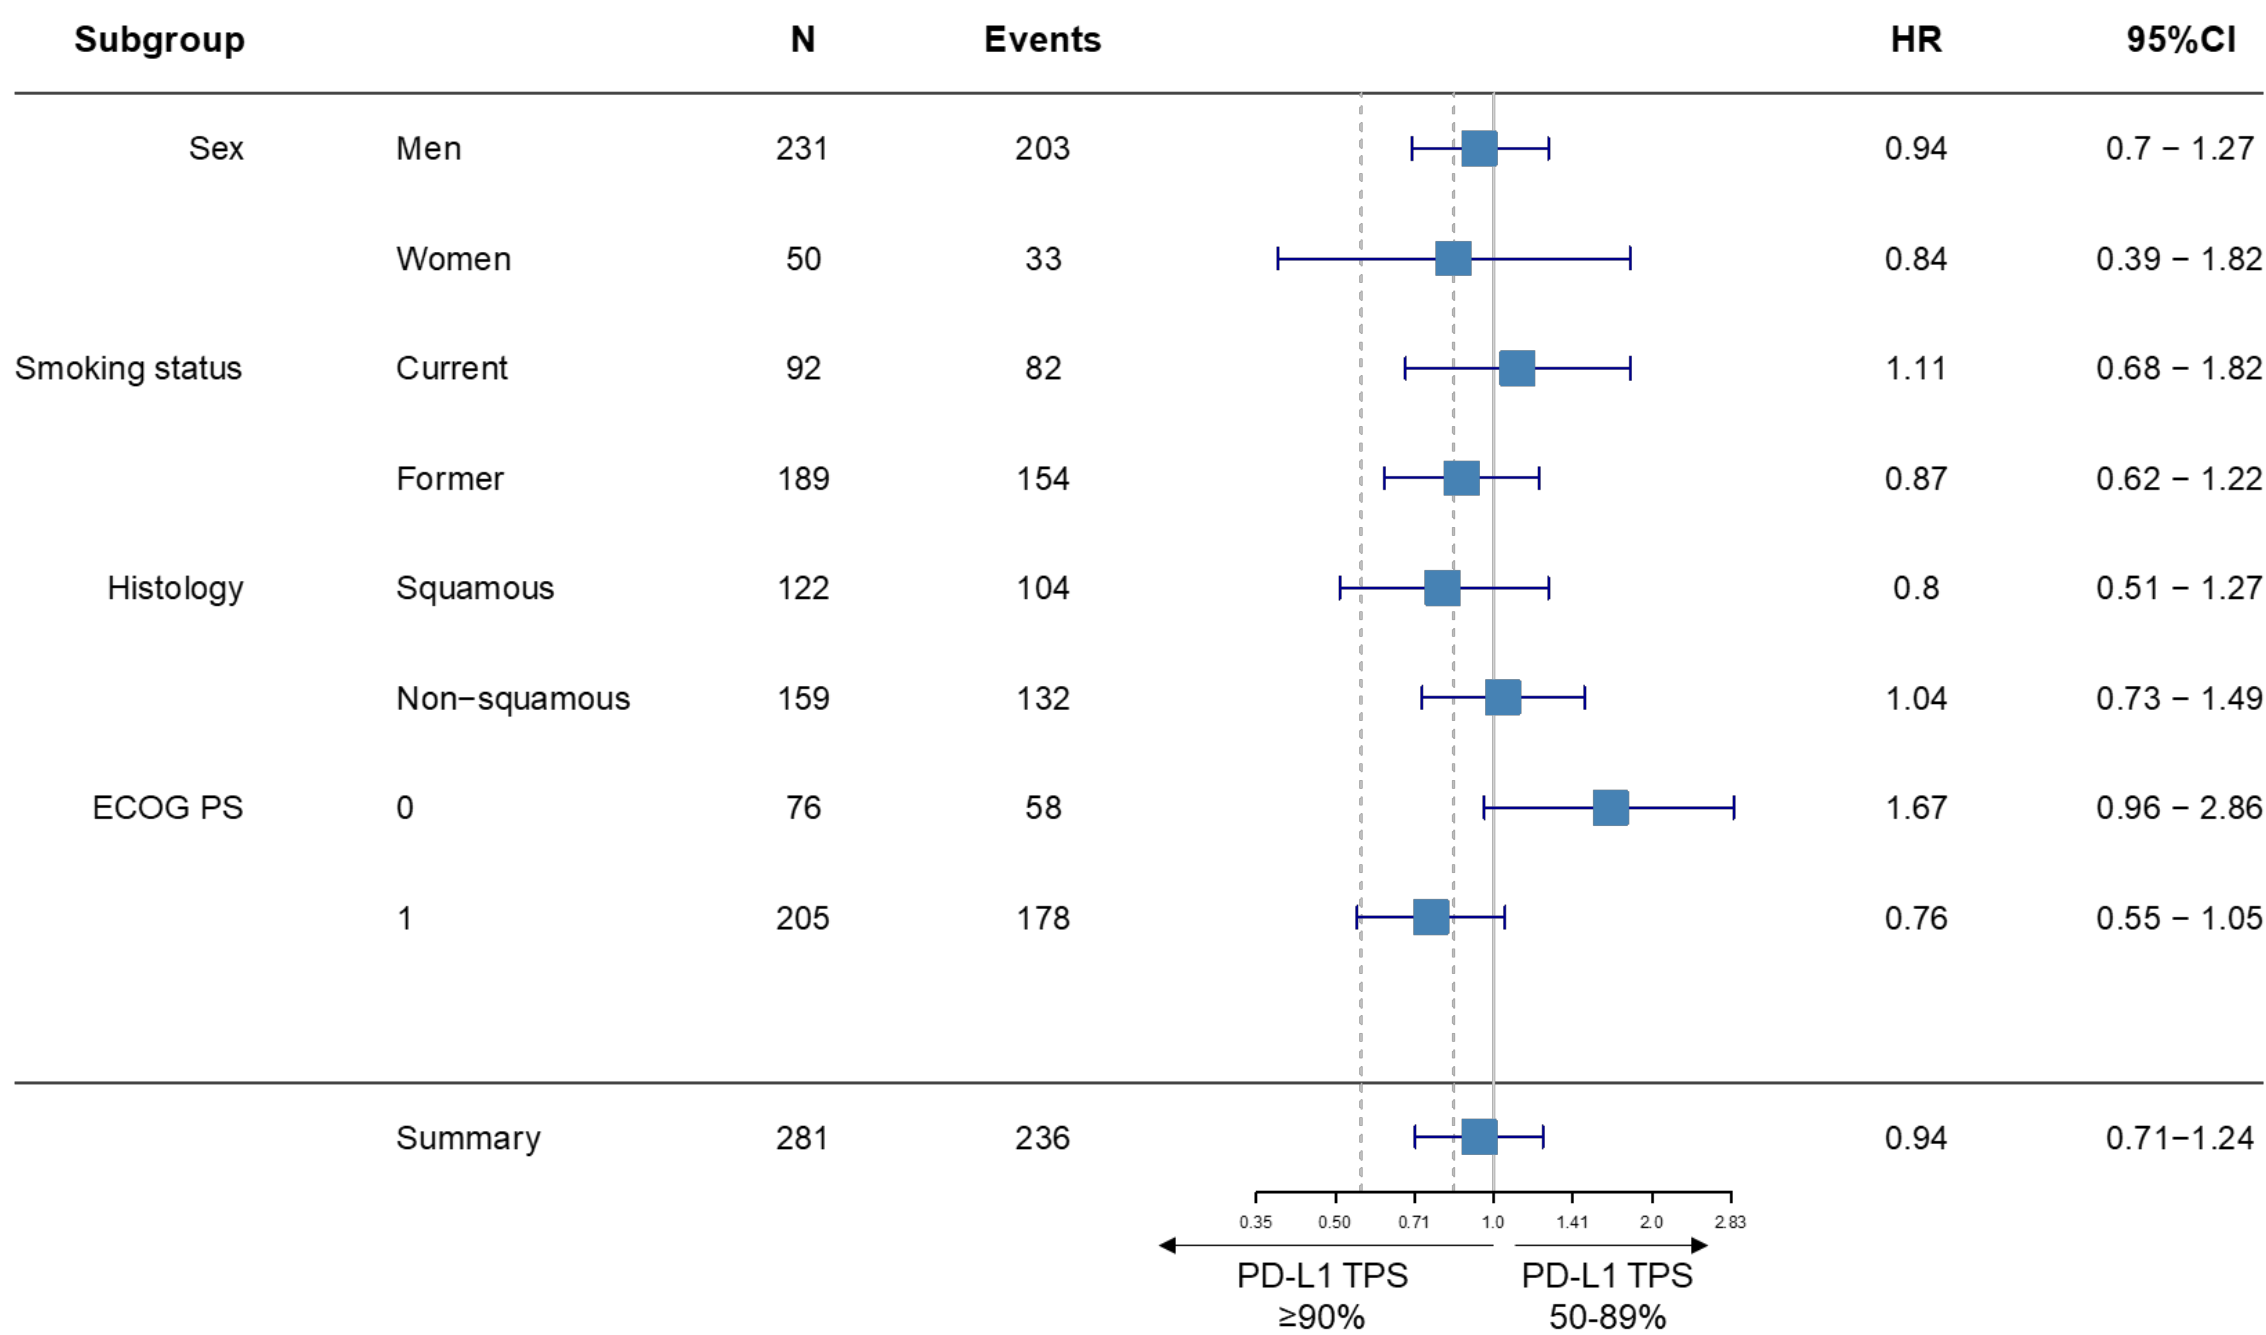

# B Overall survival to chemotherapy

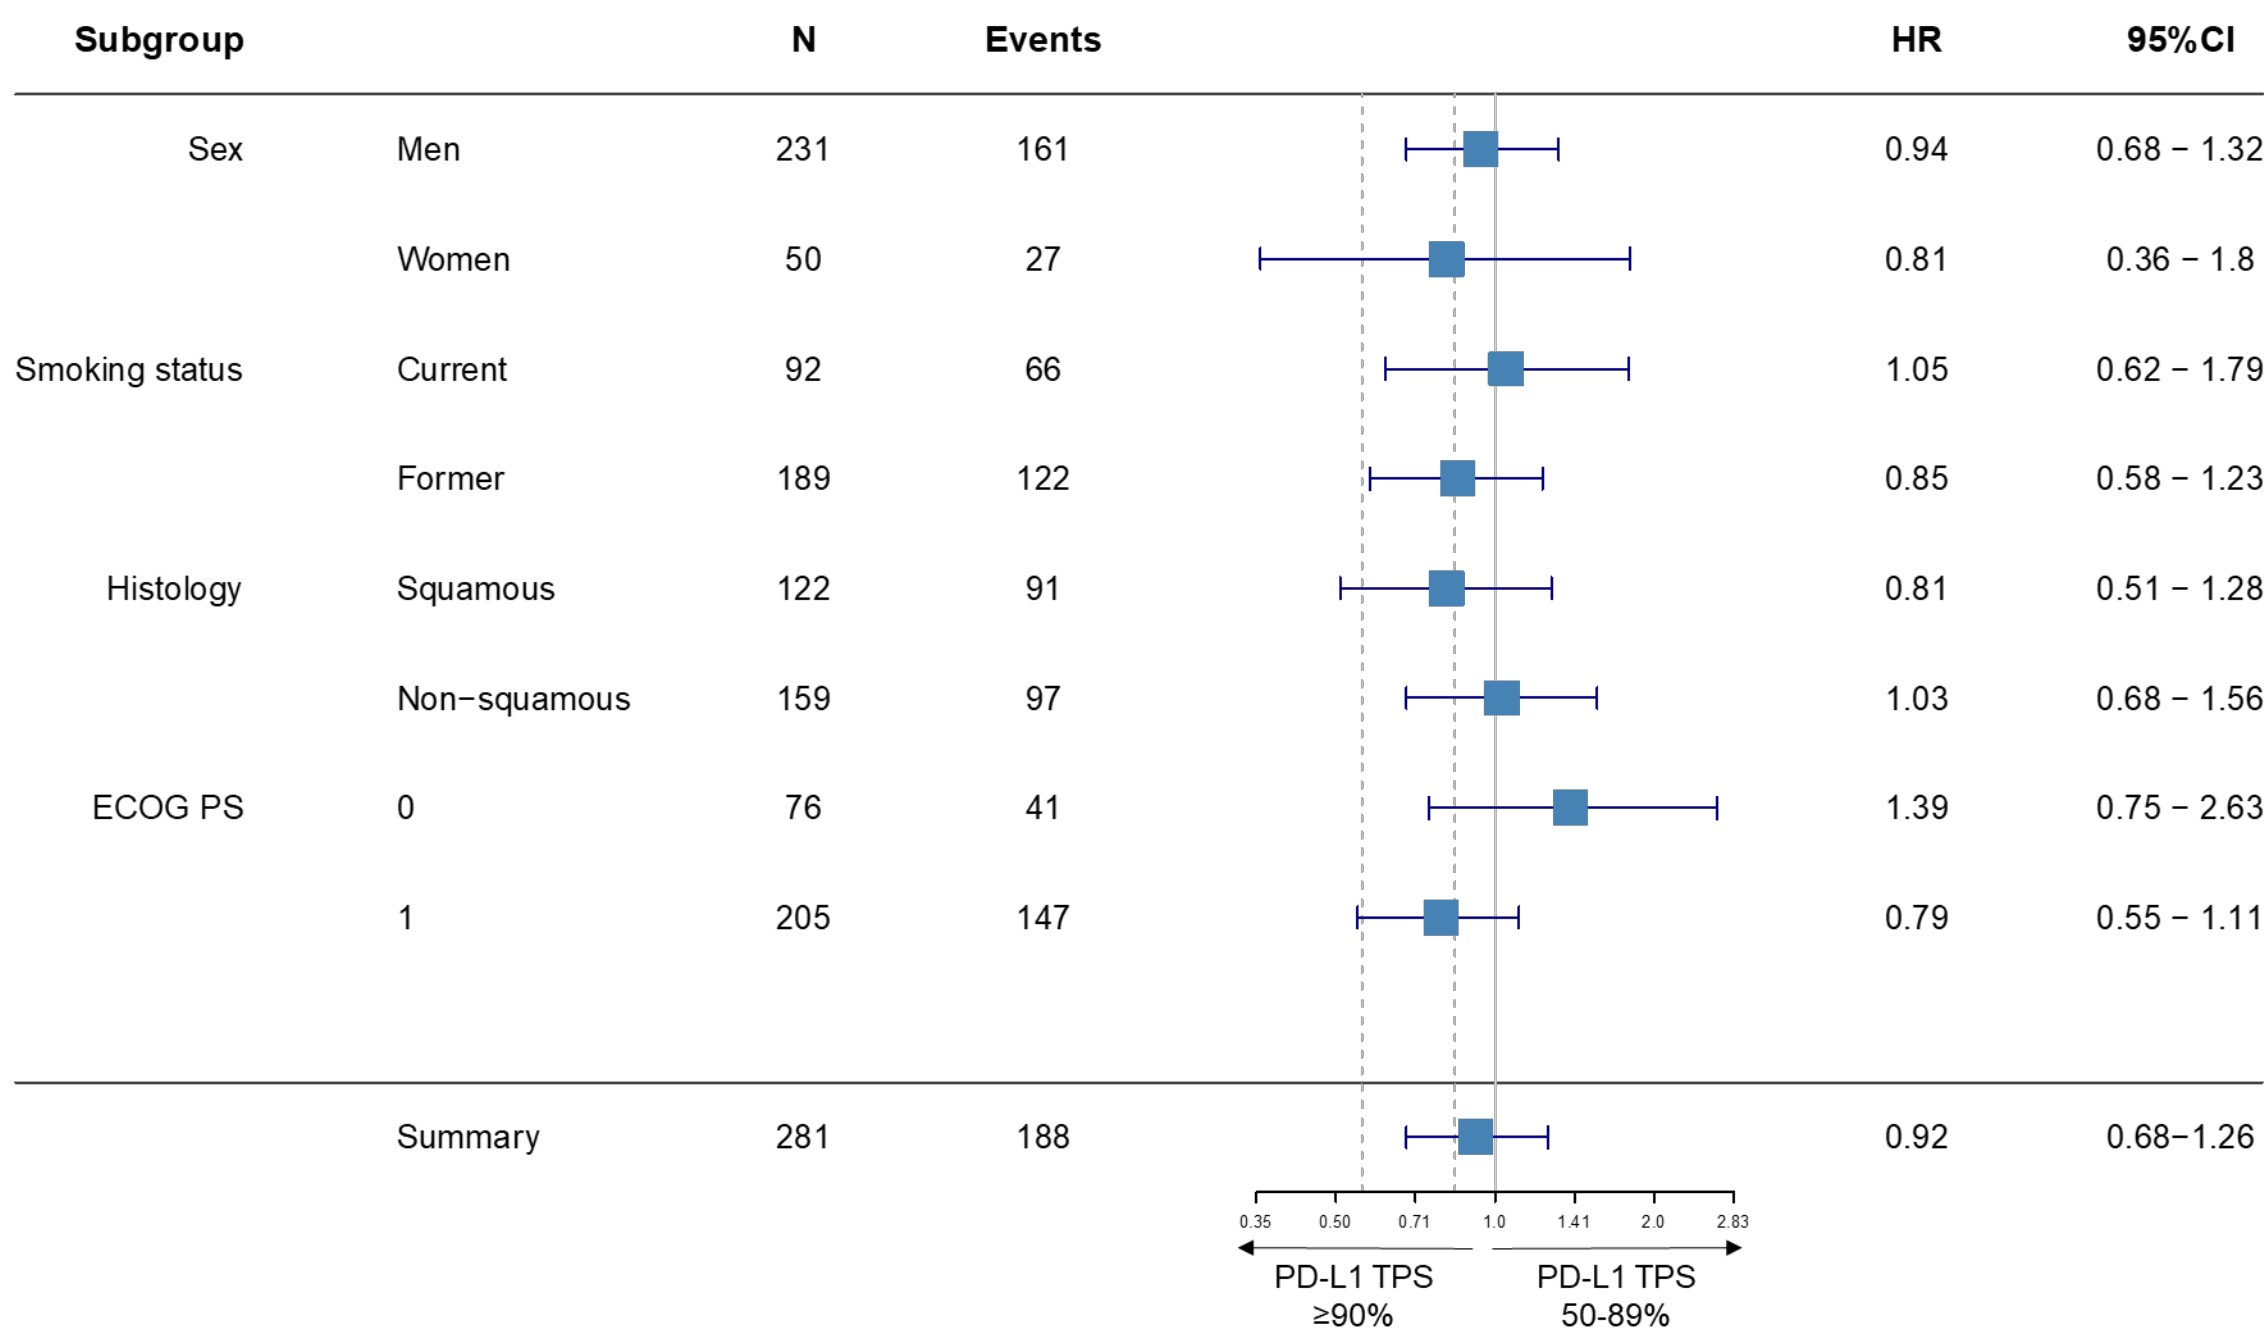

Supplementary Figure 7

**A**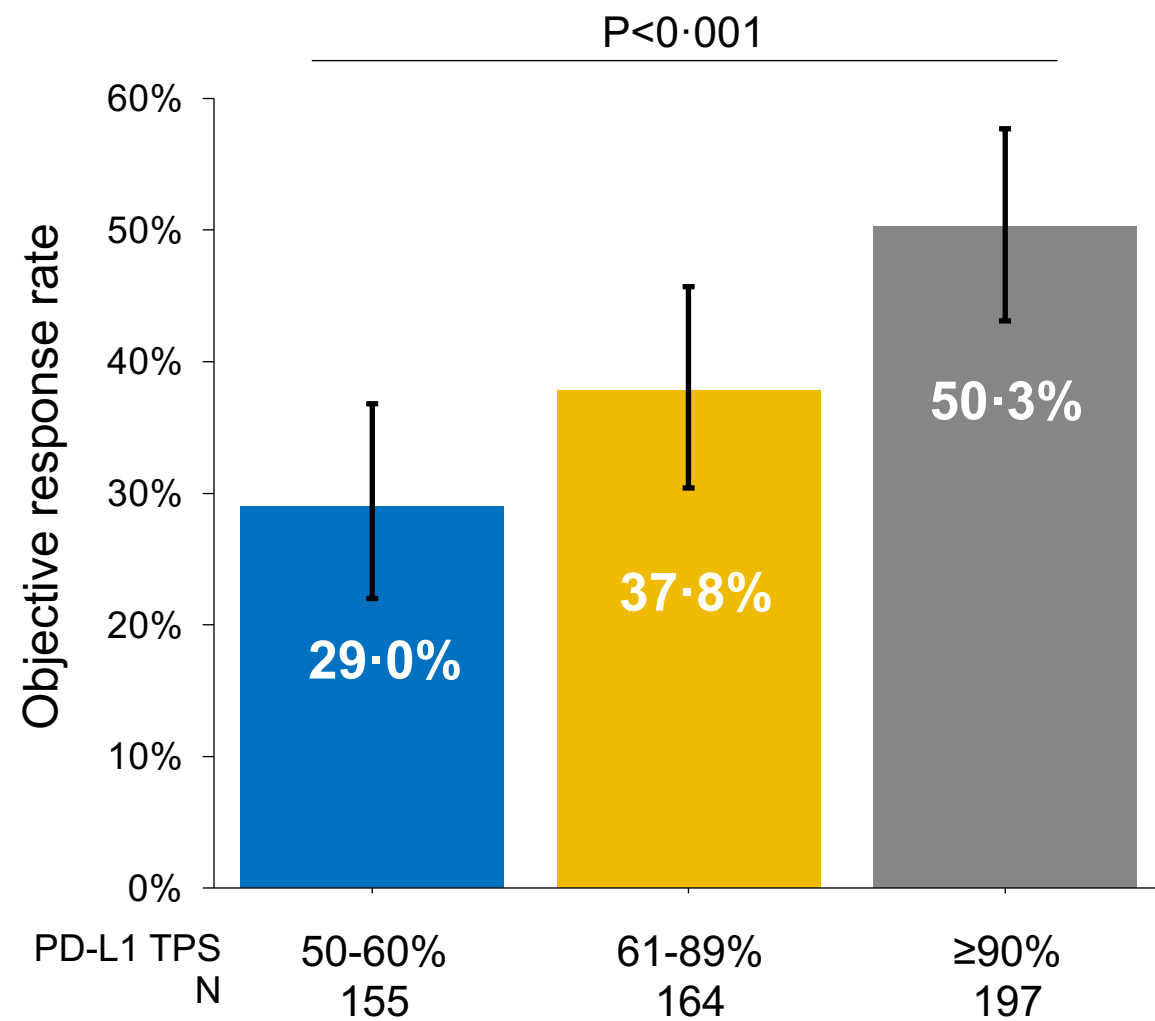**Supplementary Figure 8****B**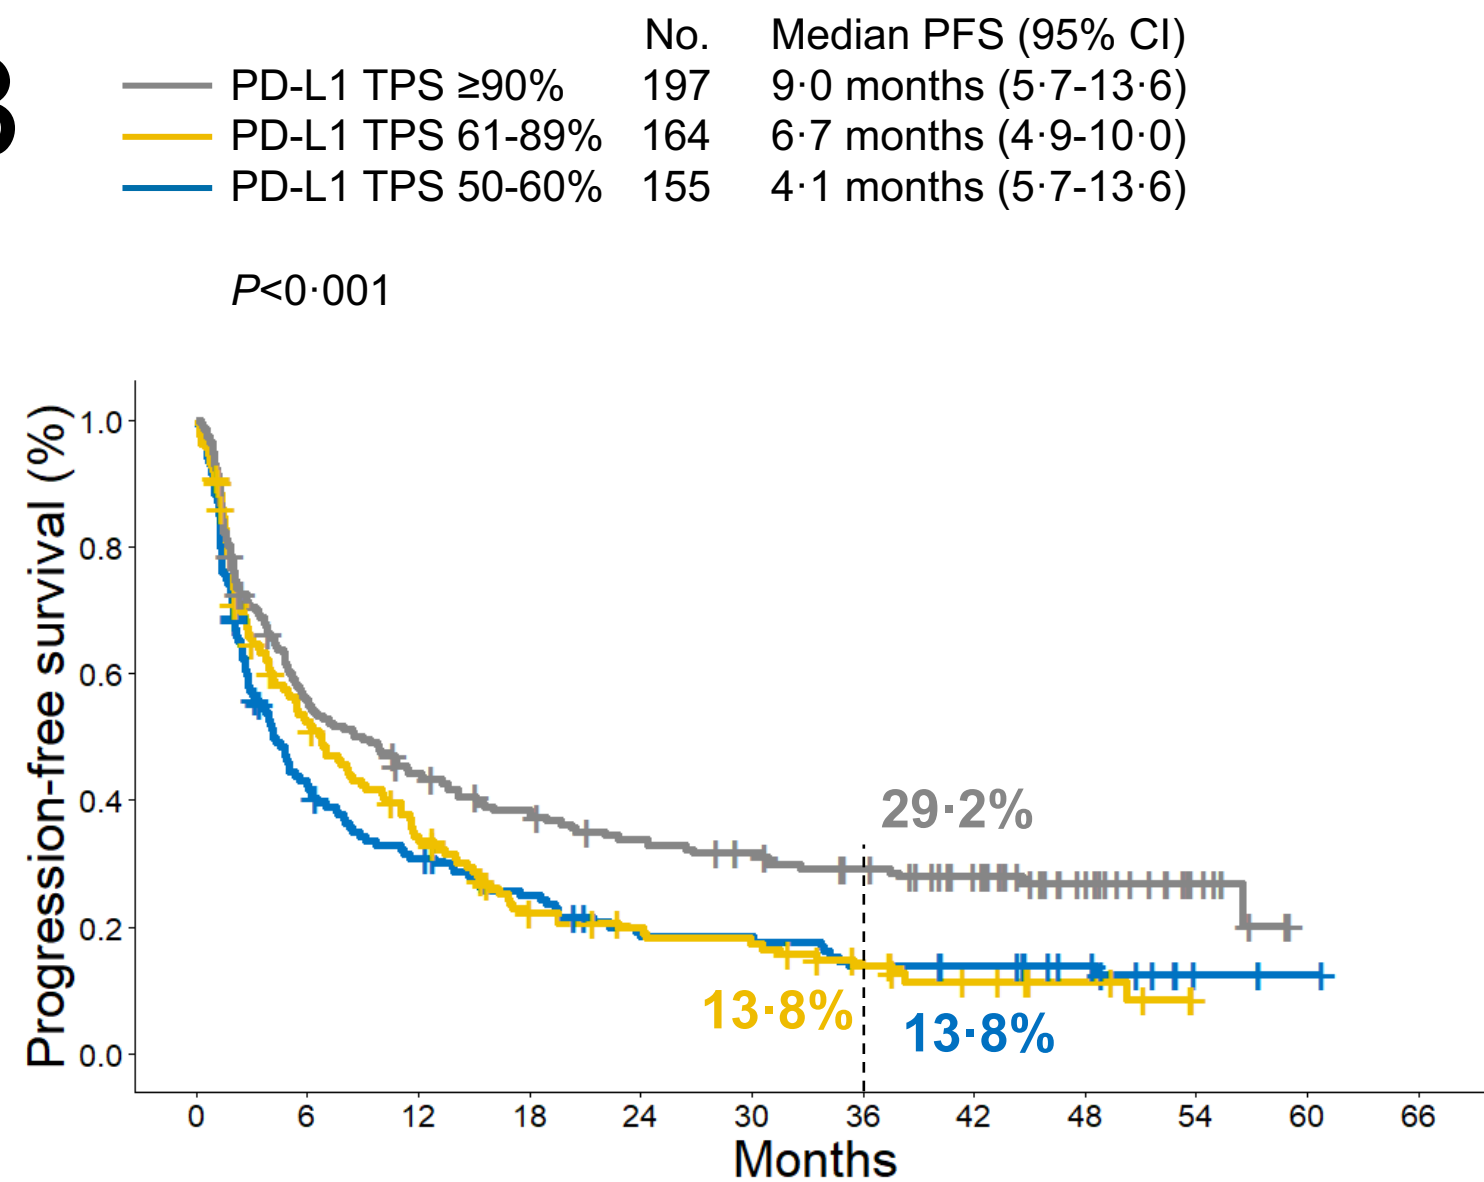

| Number at risk |     | 0   | 6   | 12 | 18 | 24 | 30 | 36 | 42 | 48 | 54 | 60 | 66 |
|----------------|-----|-----|-----|----|----|----|----|----|----|----|----|----|----|
| —              | 155 | 155 | 63  | 45 | 35 | 24 | 24 | 18 | 16 | 11 | 3  | 1  | 0  |
| —              | 164 | 164 | 80  | 50 | 29 | 24 | 21 | 14 | 8  | 5  | 0  | 0  | 0  |
| —              | 197 | 197 | 107 | 83 | 70 | 60 | 53 | 46 | 36 | 21 | 8  | 0  | 0  |

**C**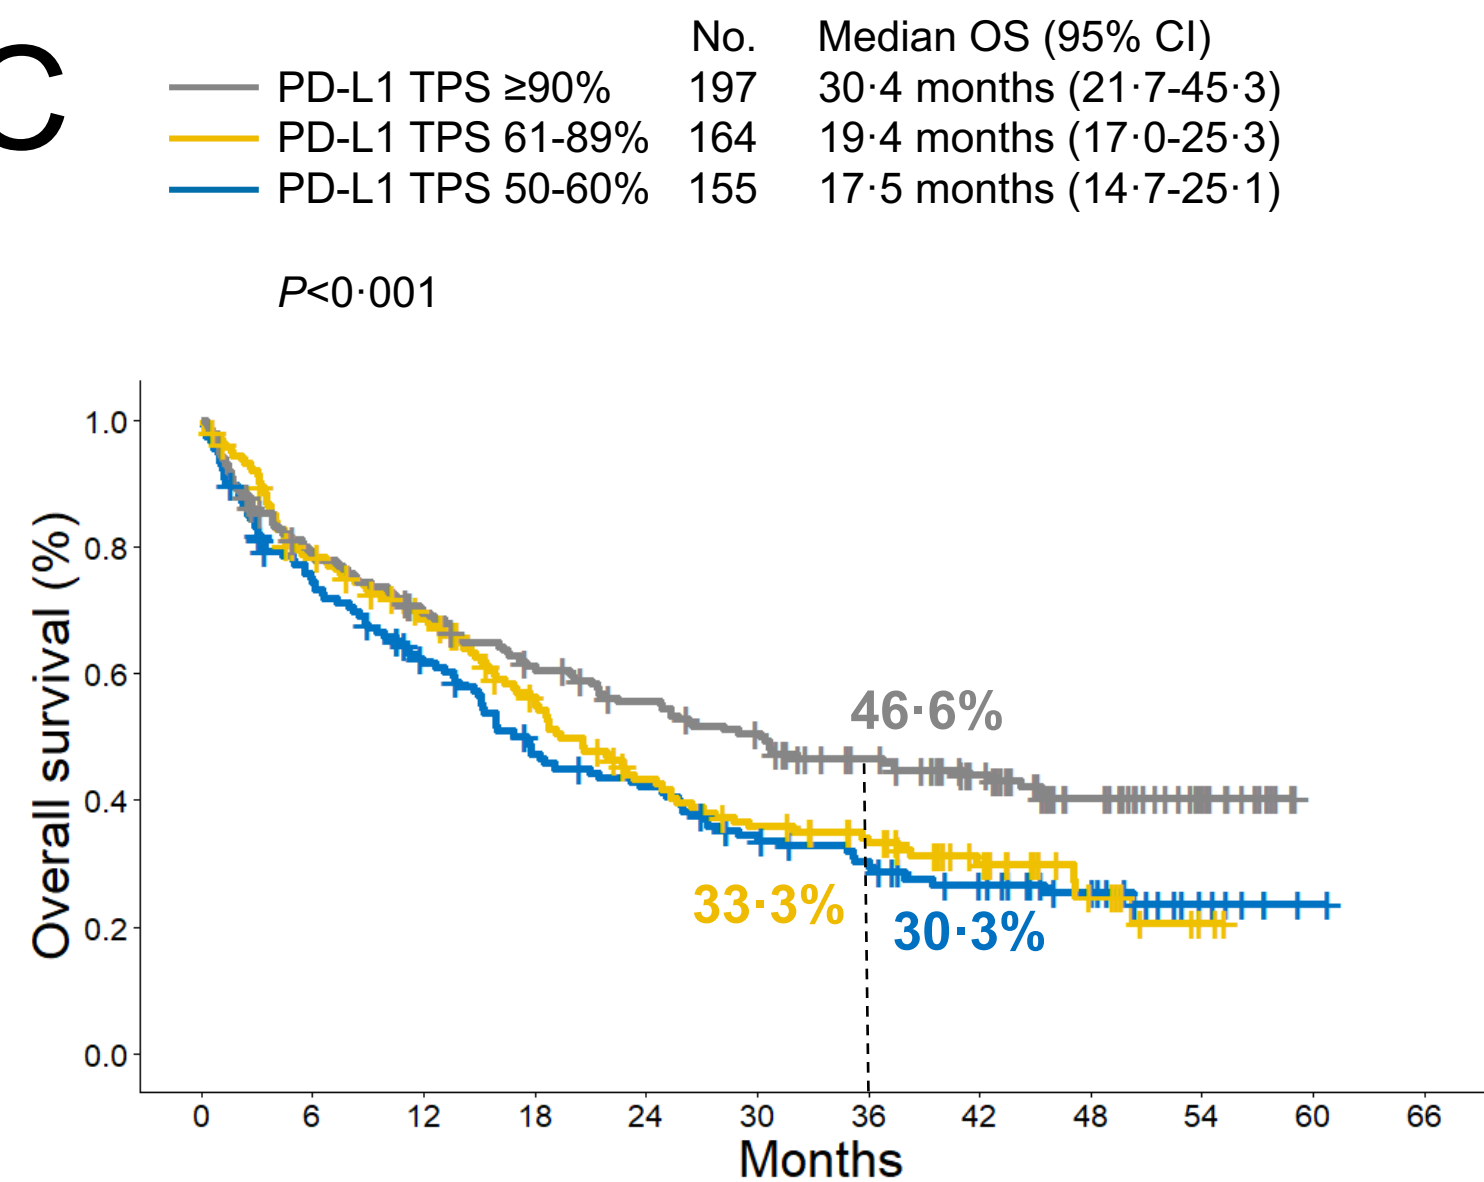

| Number at risk |     | 0   | 6   | 12  | 18  | 24  | 30 | 36 | 42 | 48 | 54 | 60 | 66 |
|----------------|-----|-----|-----|-----|-----|-----|----|----|----|----|----|----|----|
| —              | 155 | 155 | 111 | 87  | 65  | 56  | 42 | 36 | 26 | 18 | 7  | 1  | 0  |
| —              | 164 | 164 | 124 | 104 | 78  | 58  | 47 | 38 | 21 | 9  | 2  | 0  | 0  |
| —              | 197 | 197 | 152 | 131 | 113 | 100 | 89 | 74 | 58 | 33 | 15 | 0  | 0  |



Supplementary Figure 9

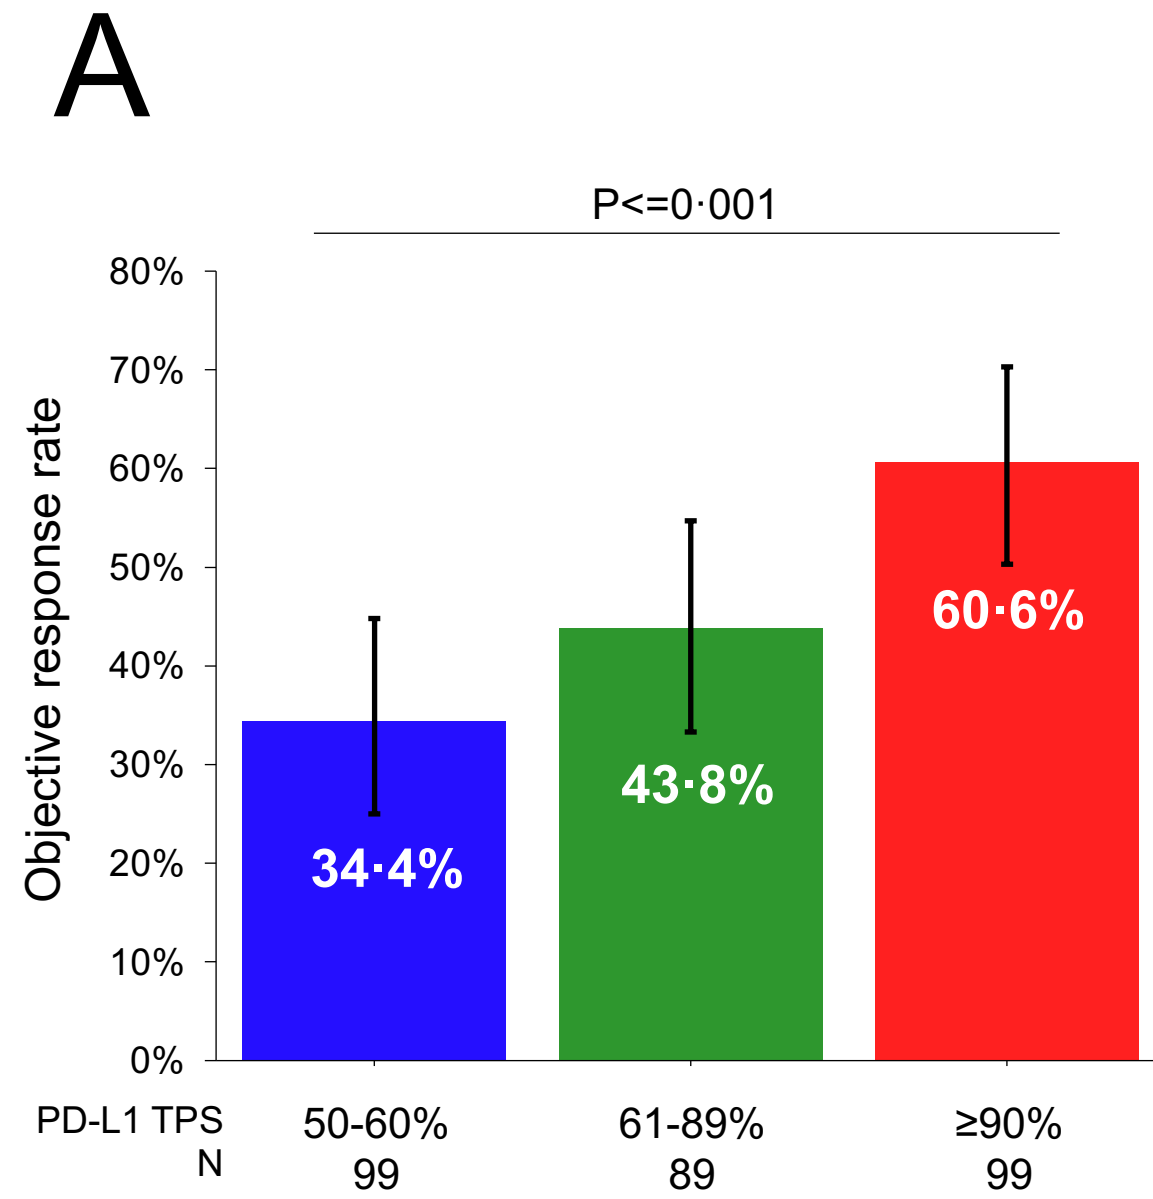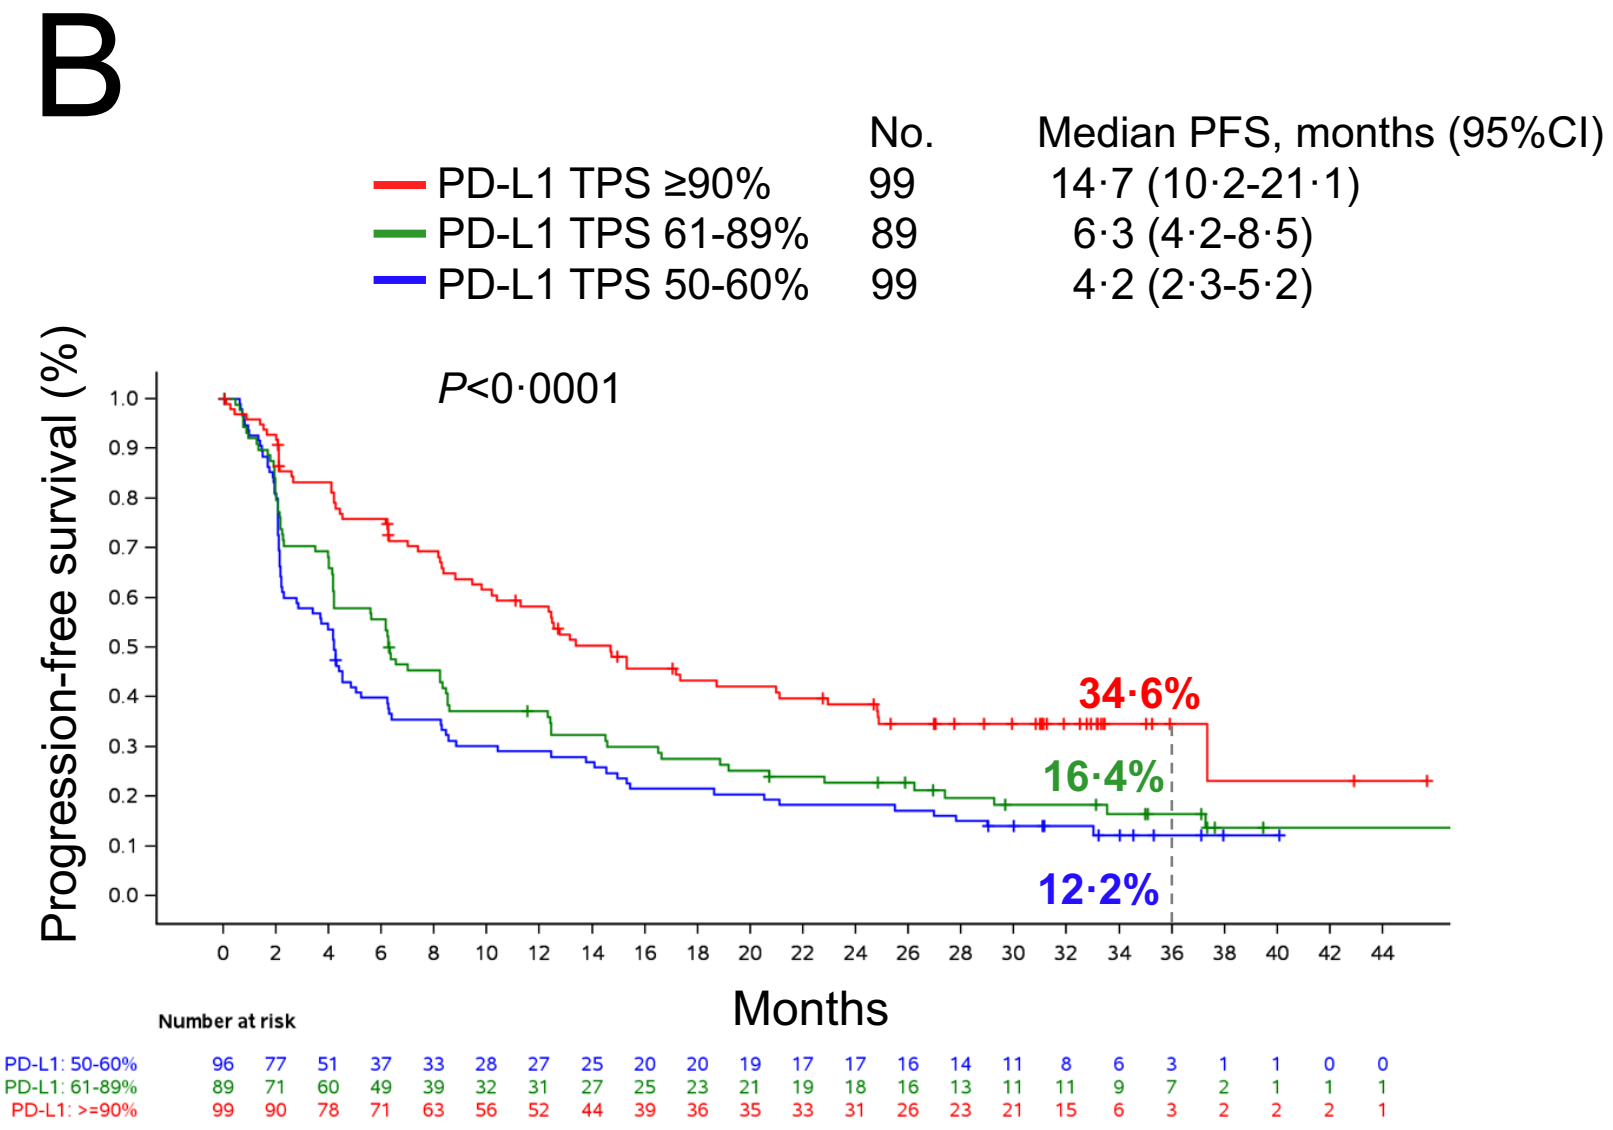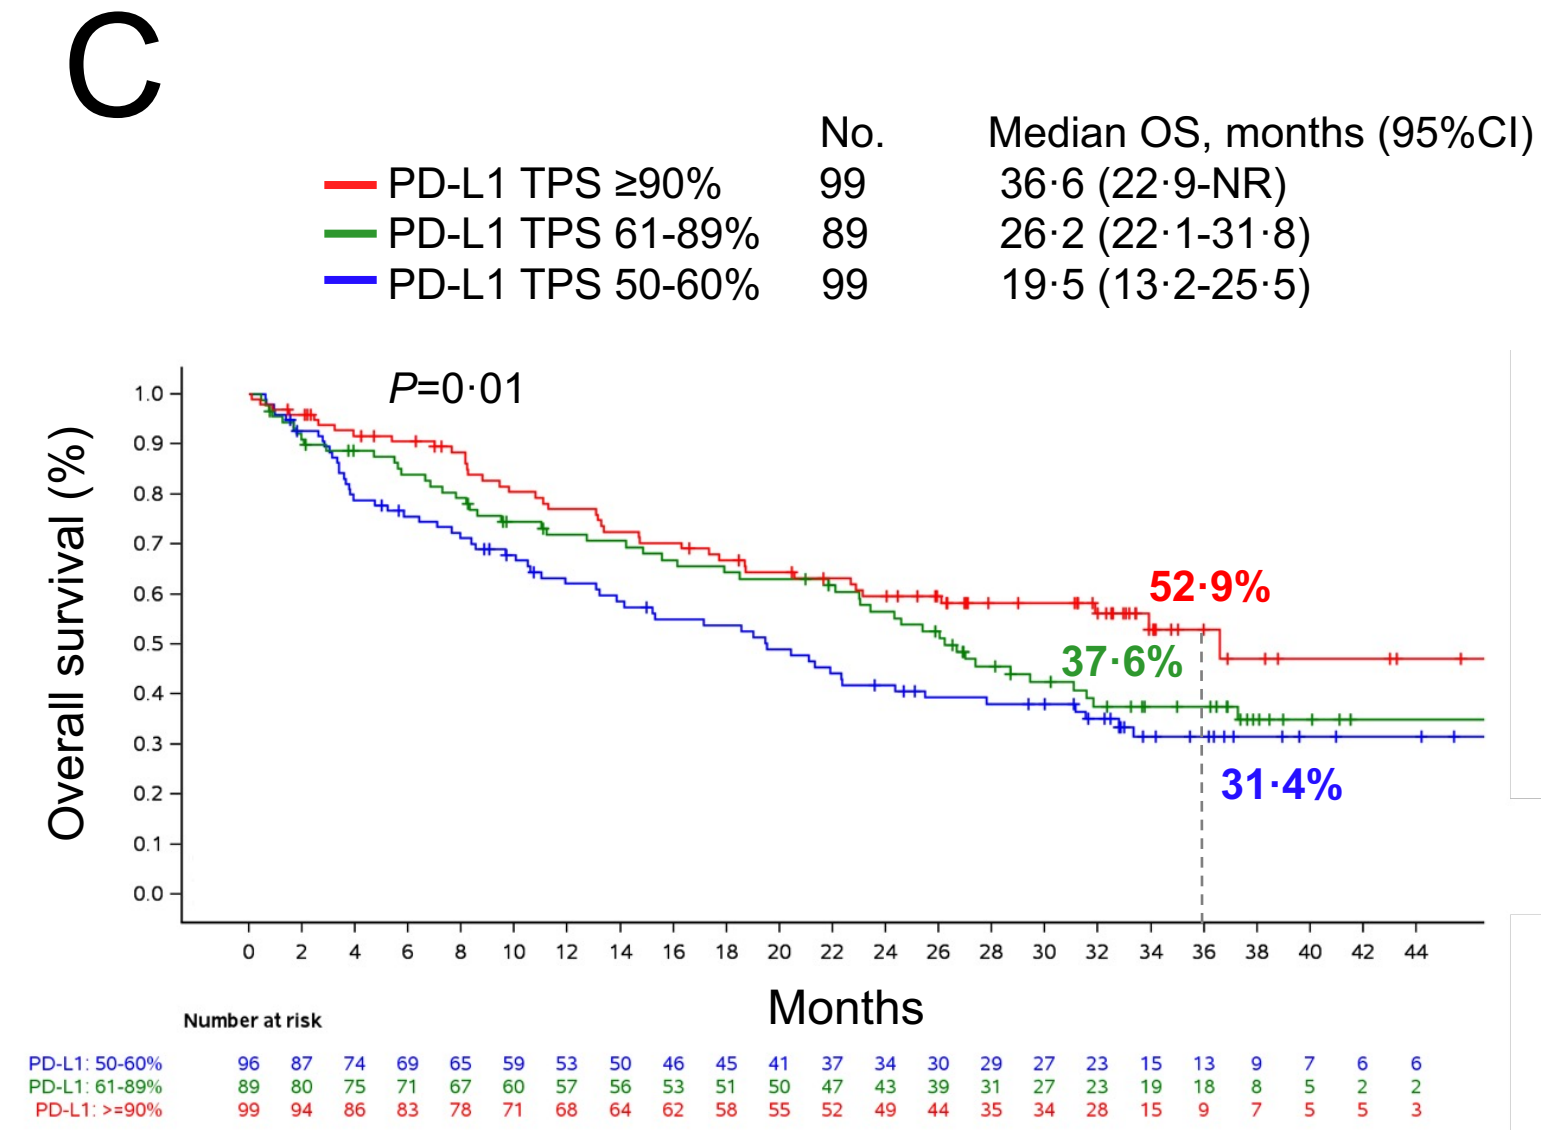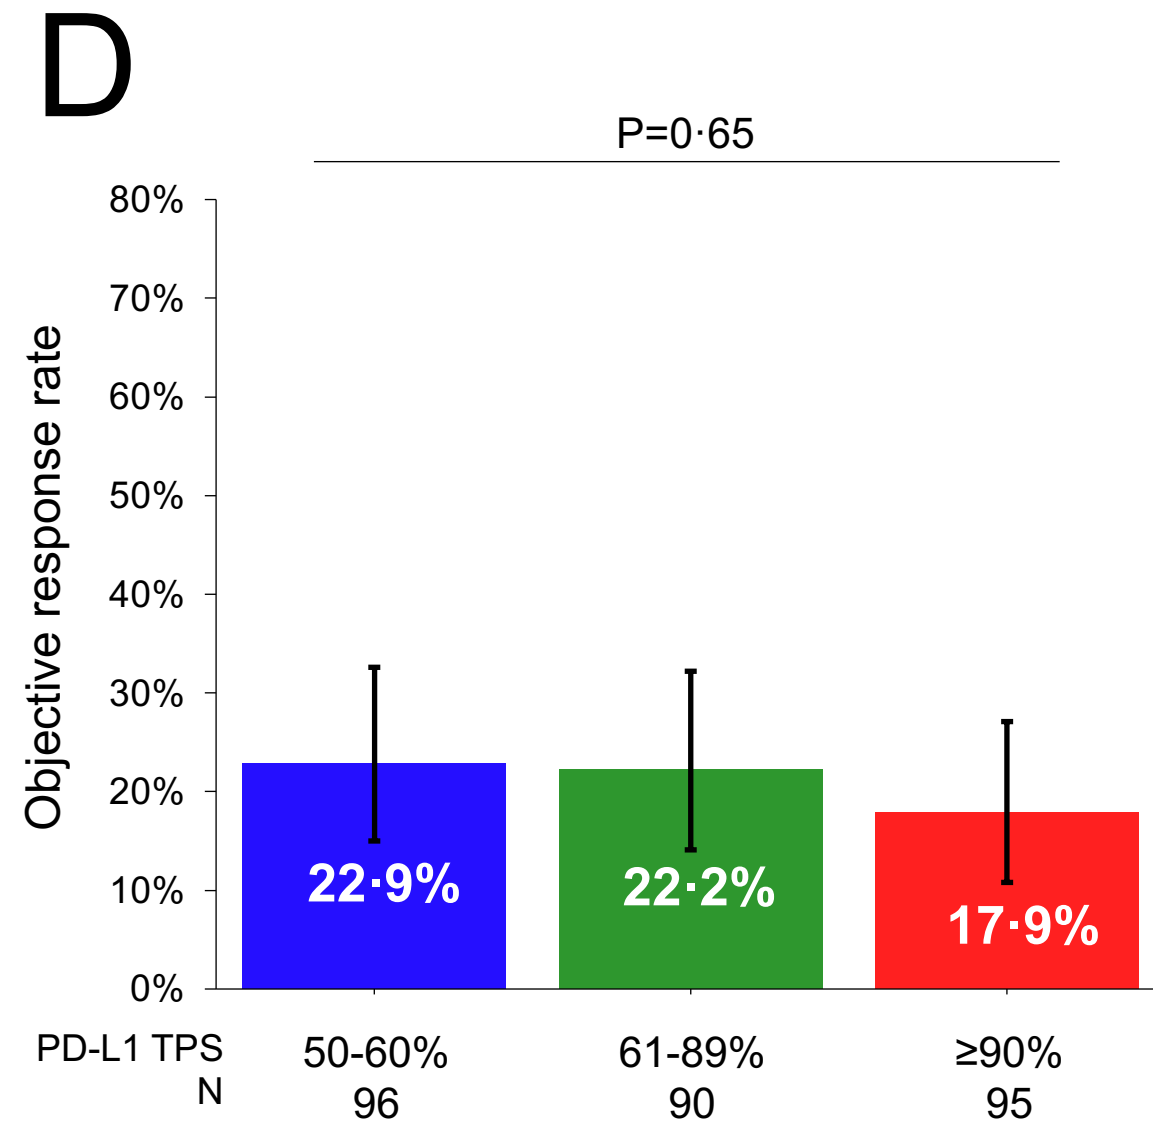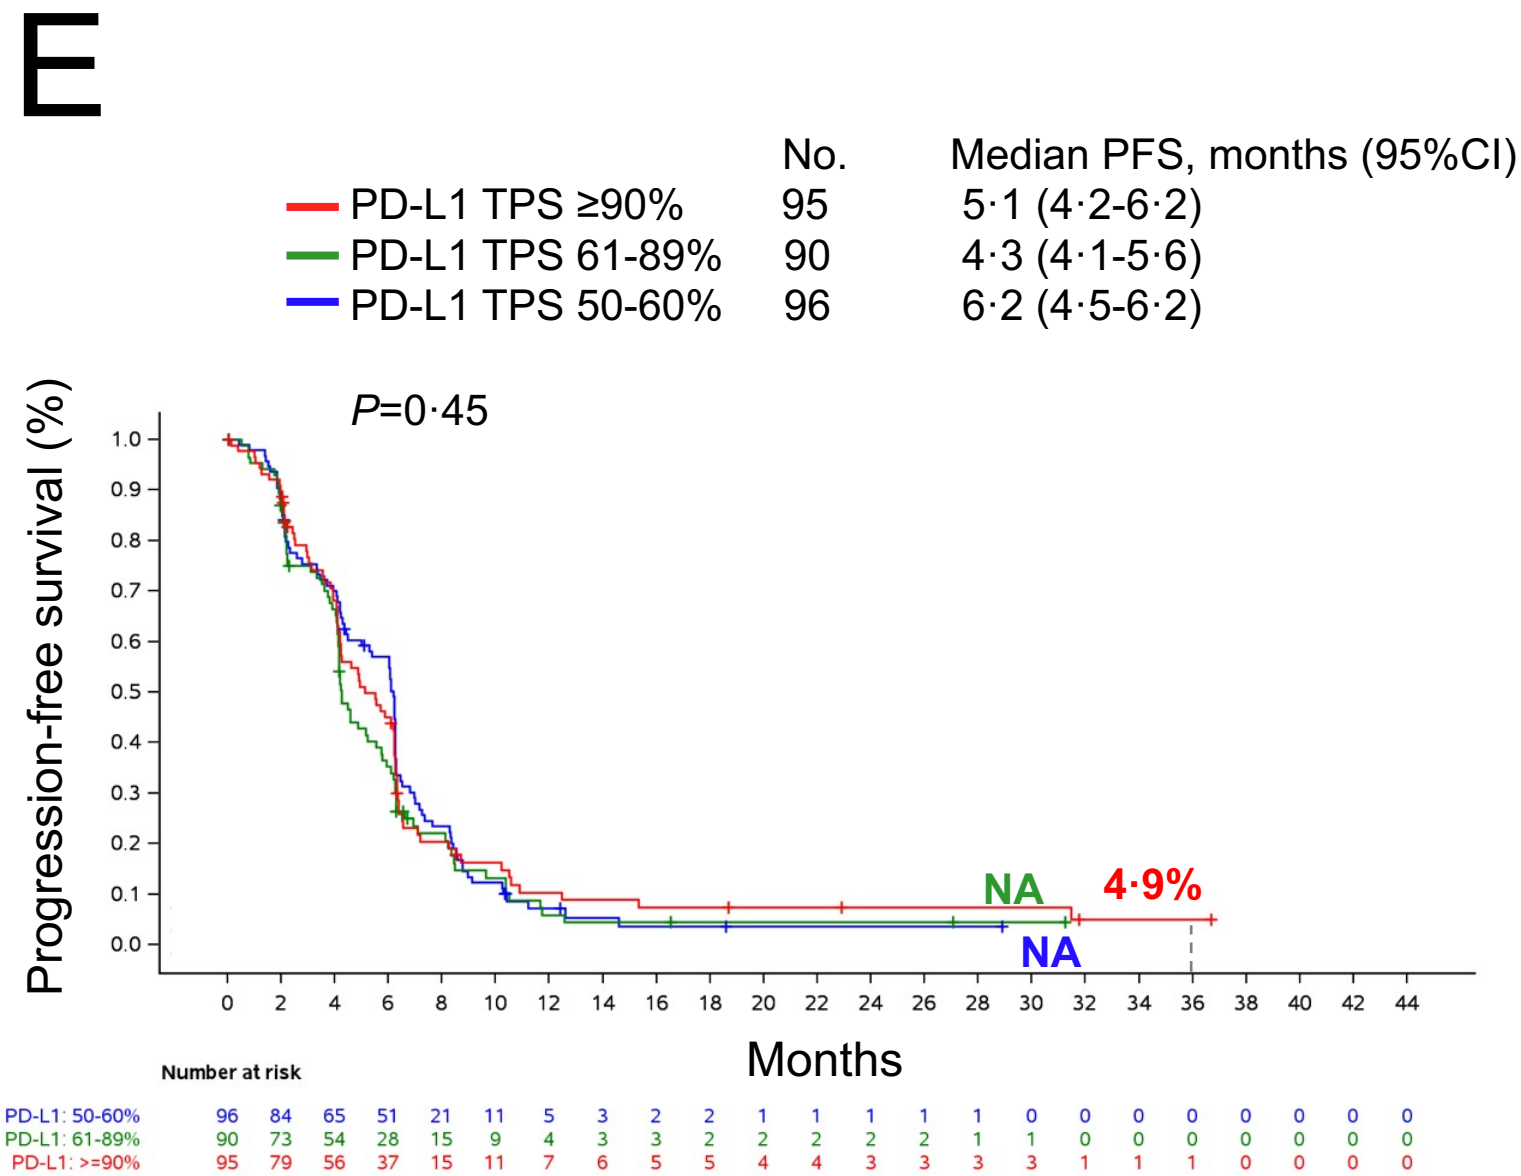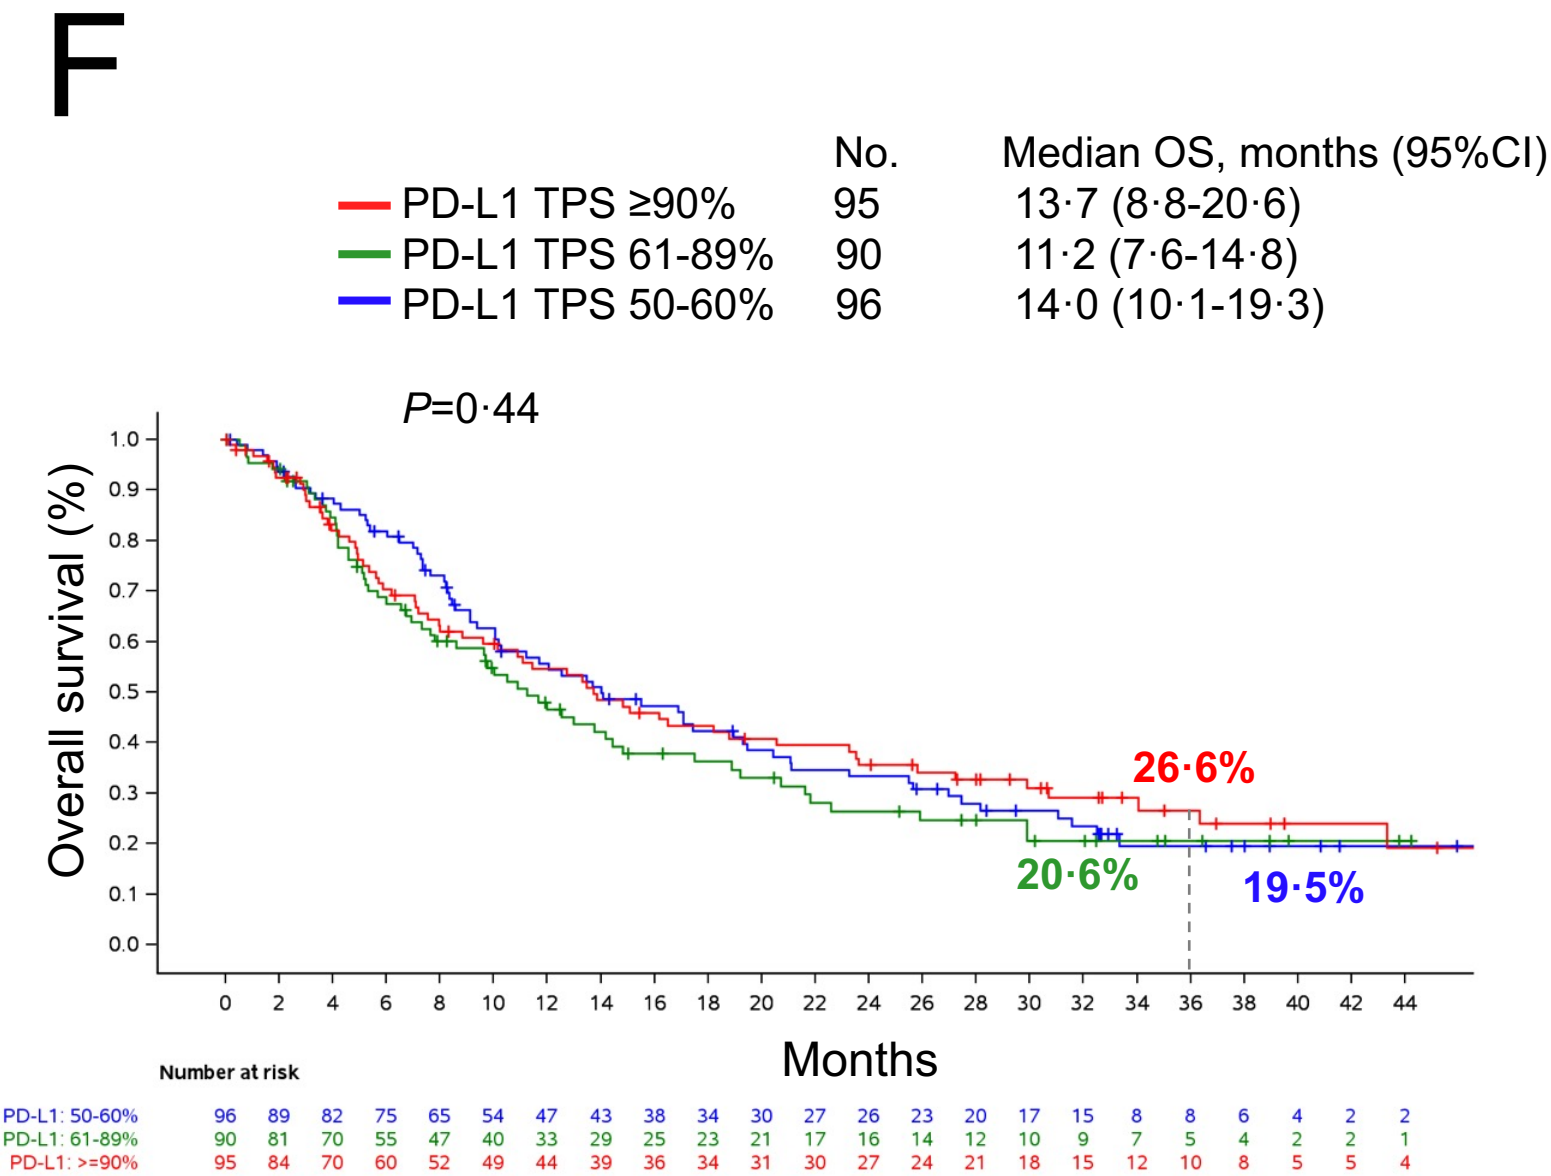

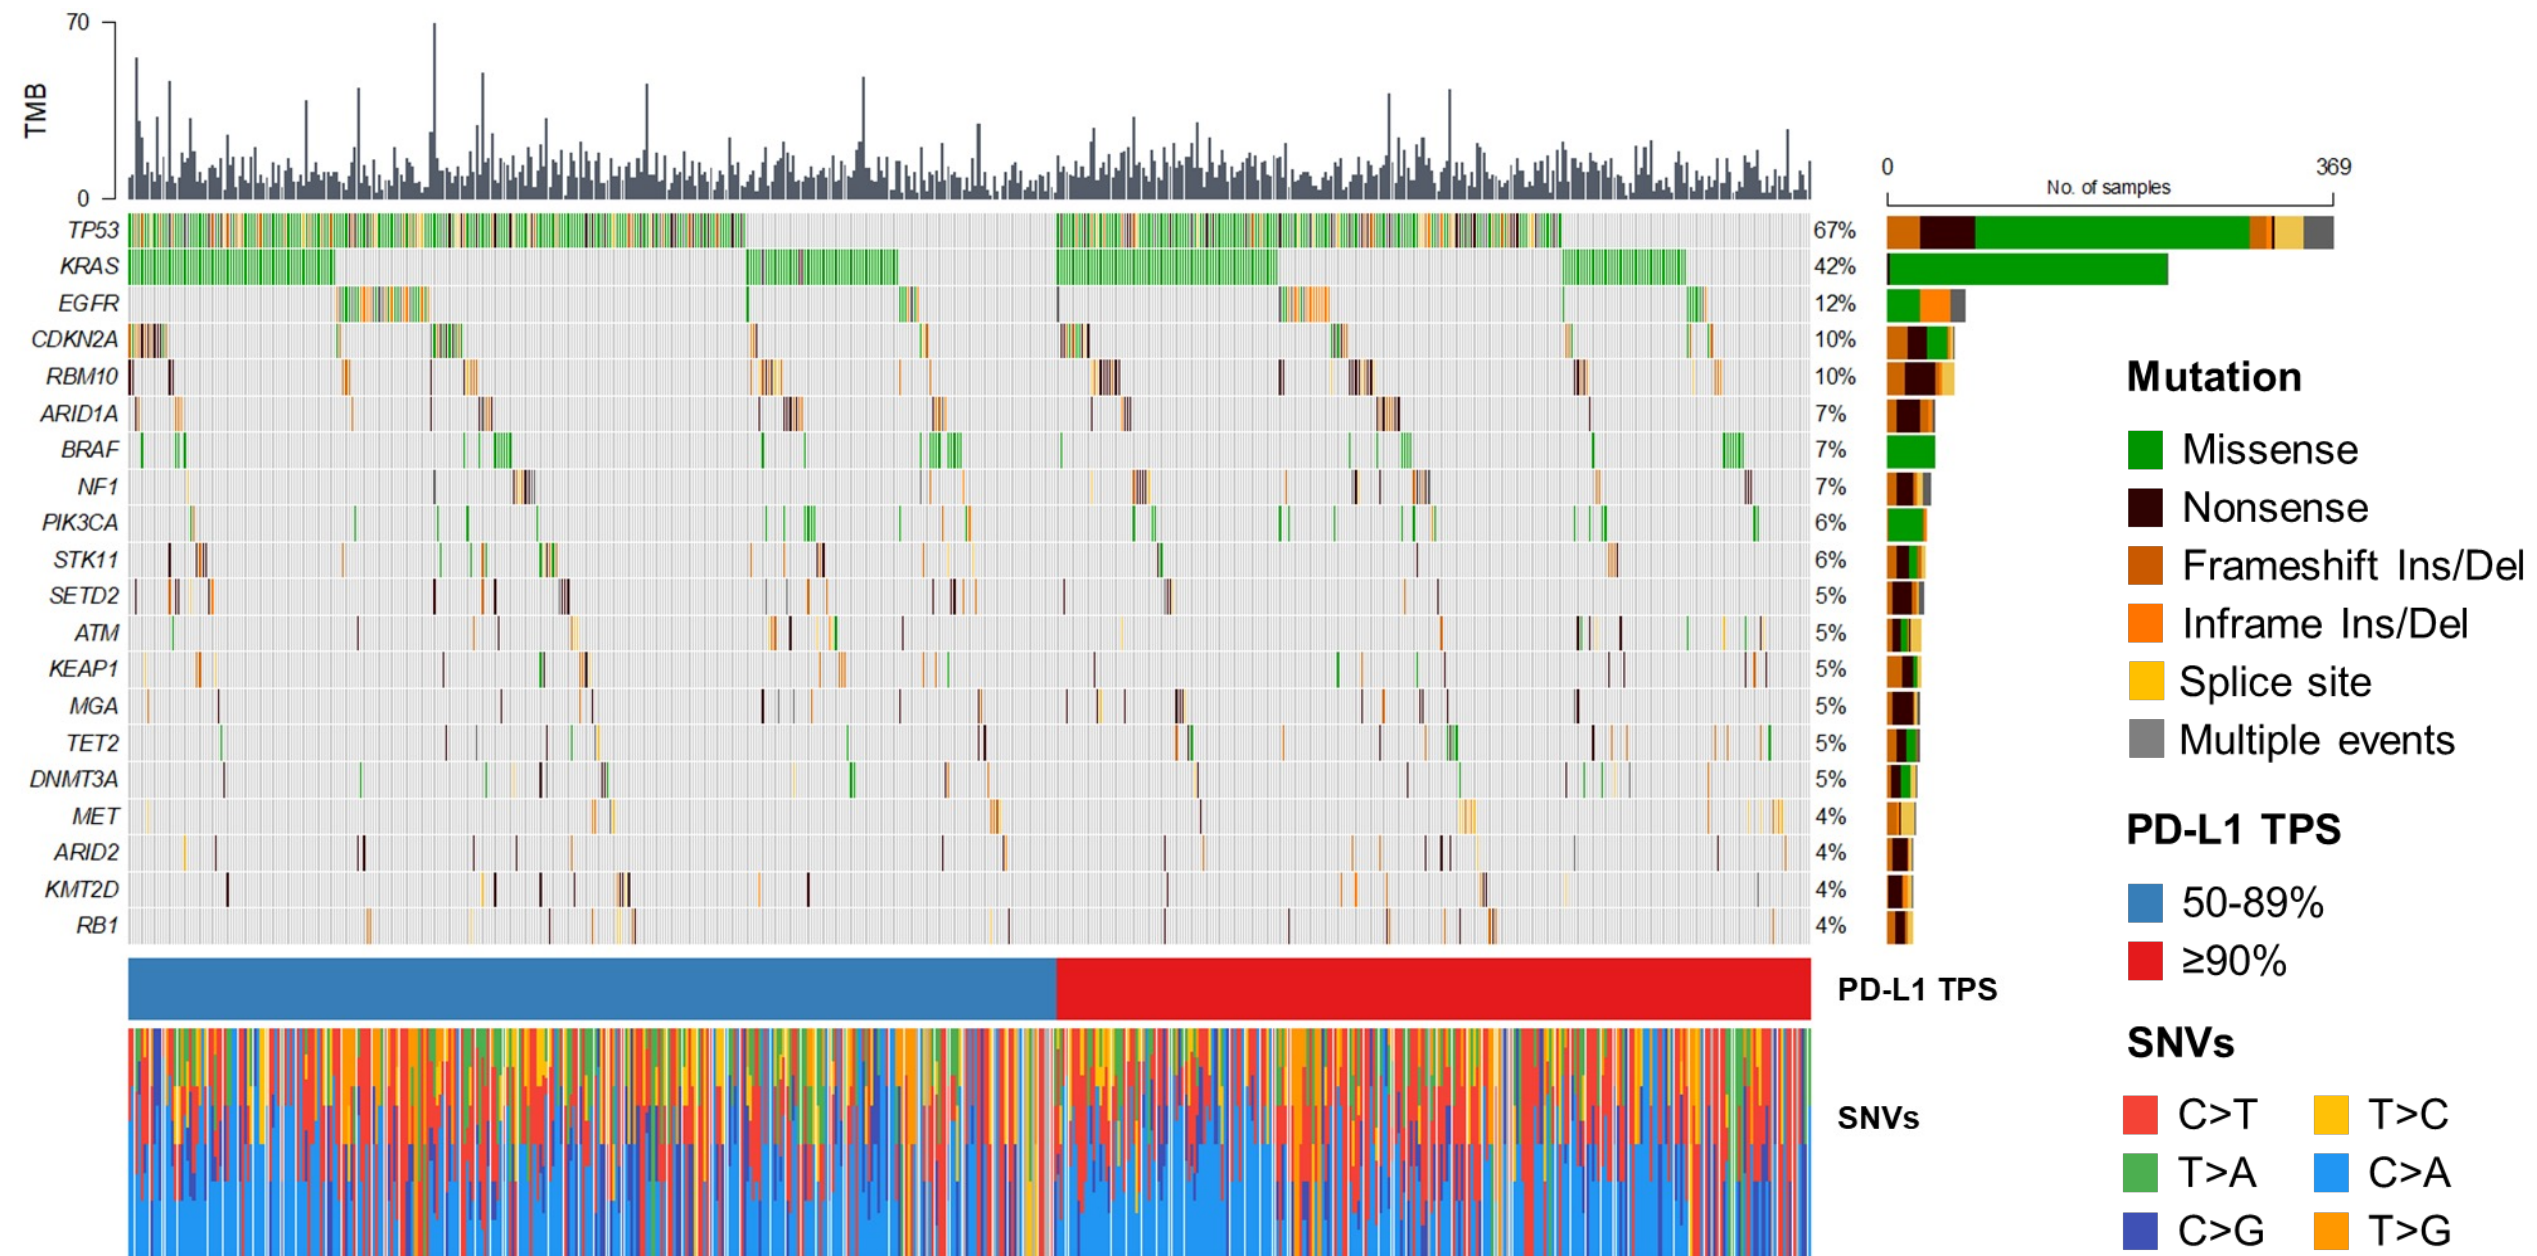

Supplementary Figure 10

**A**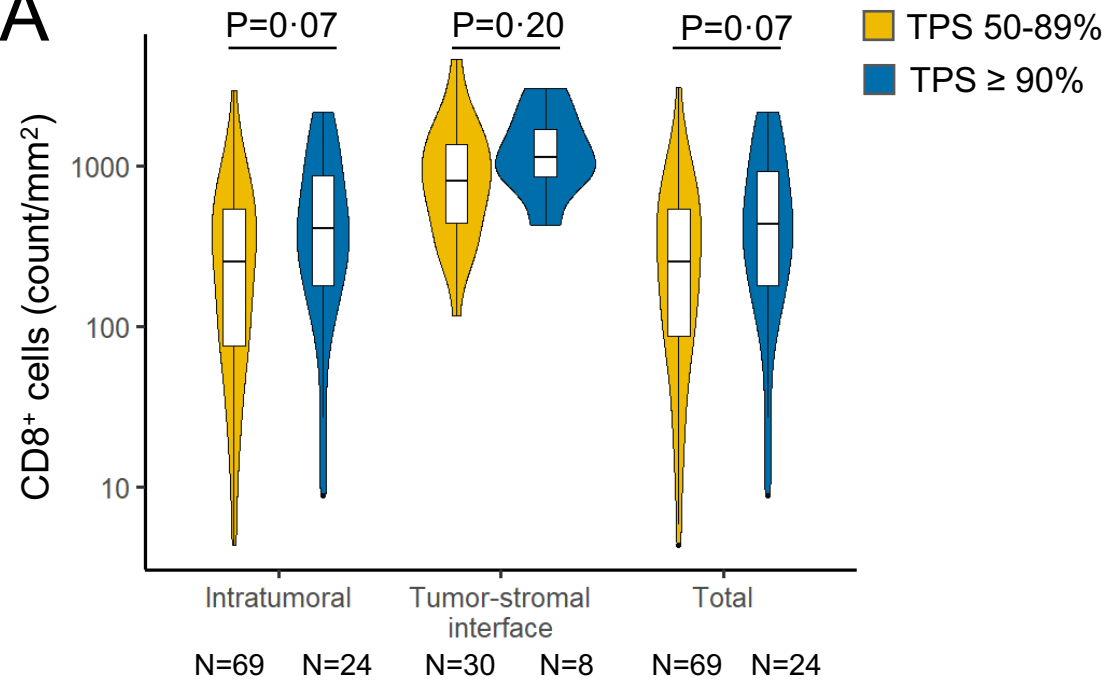**B**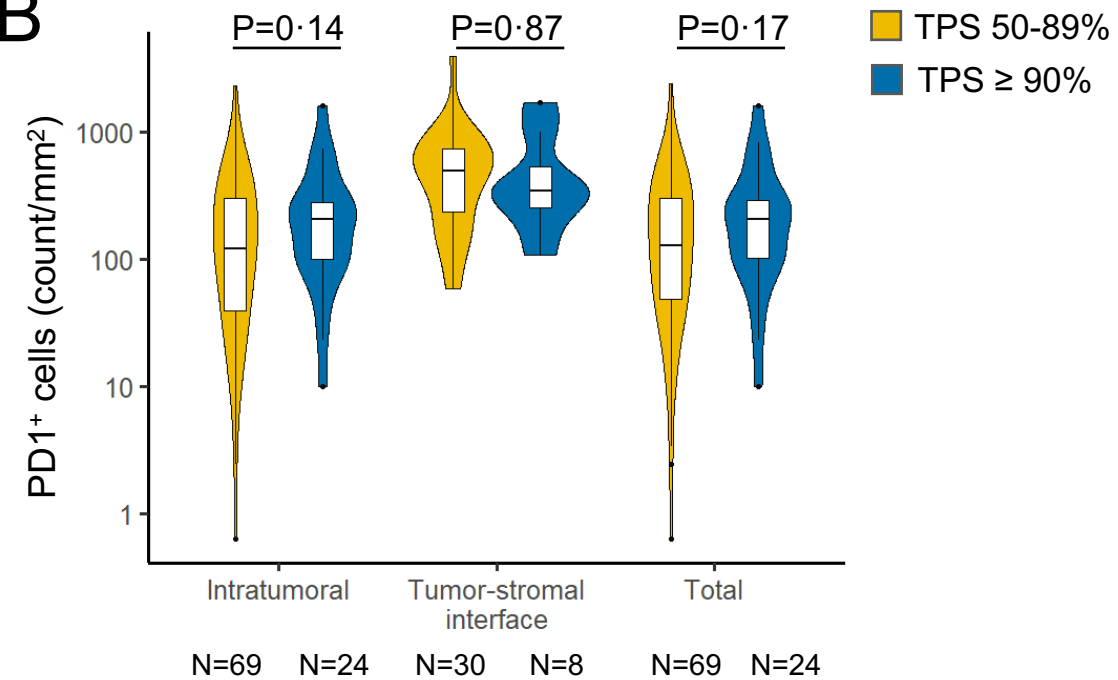**C**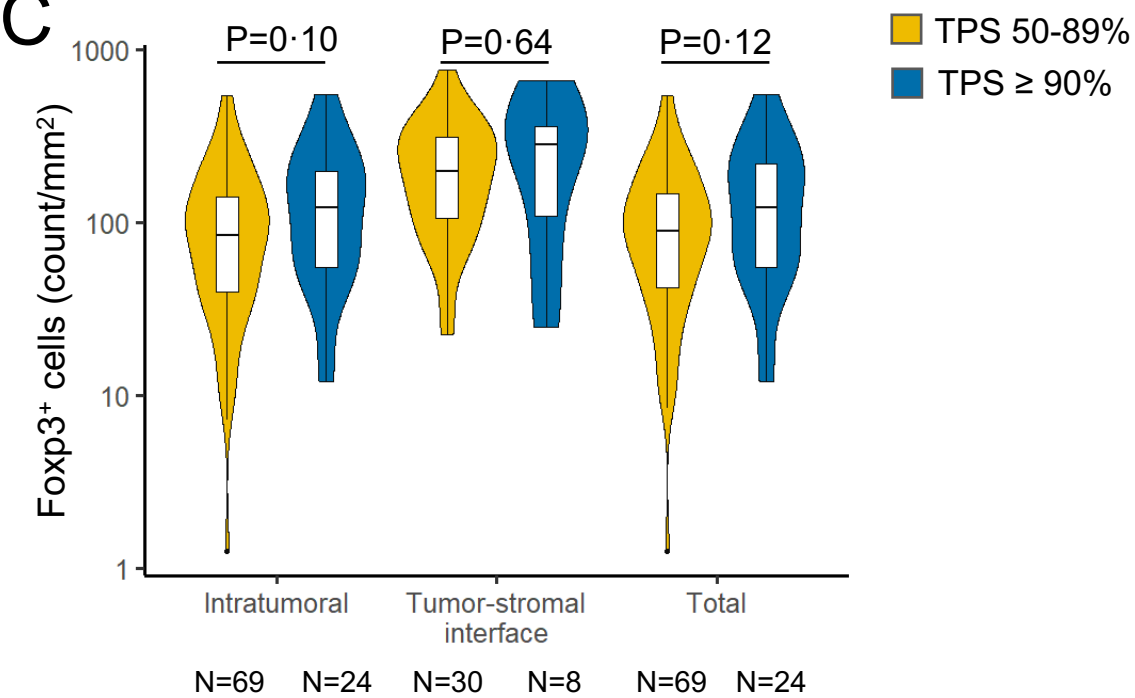**Supplementary Figure 11**

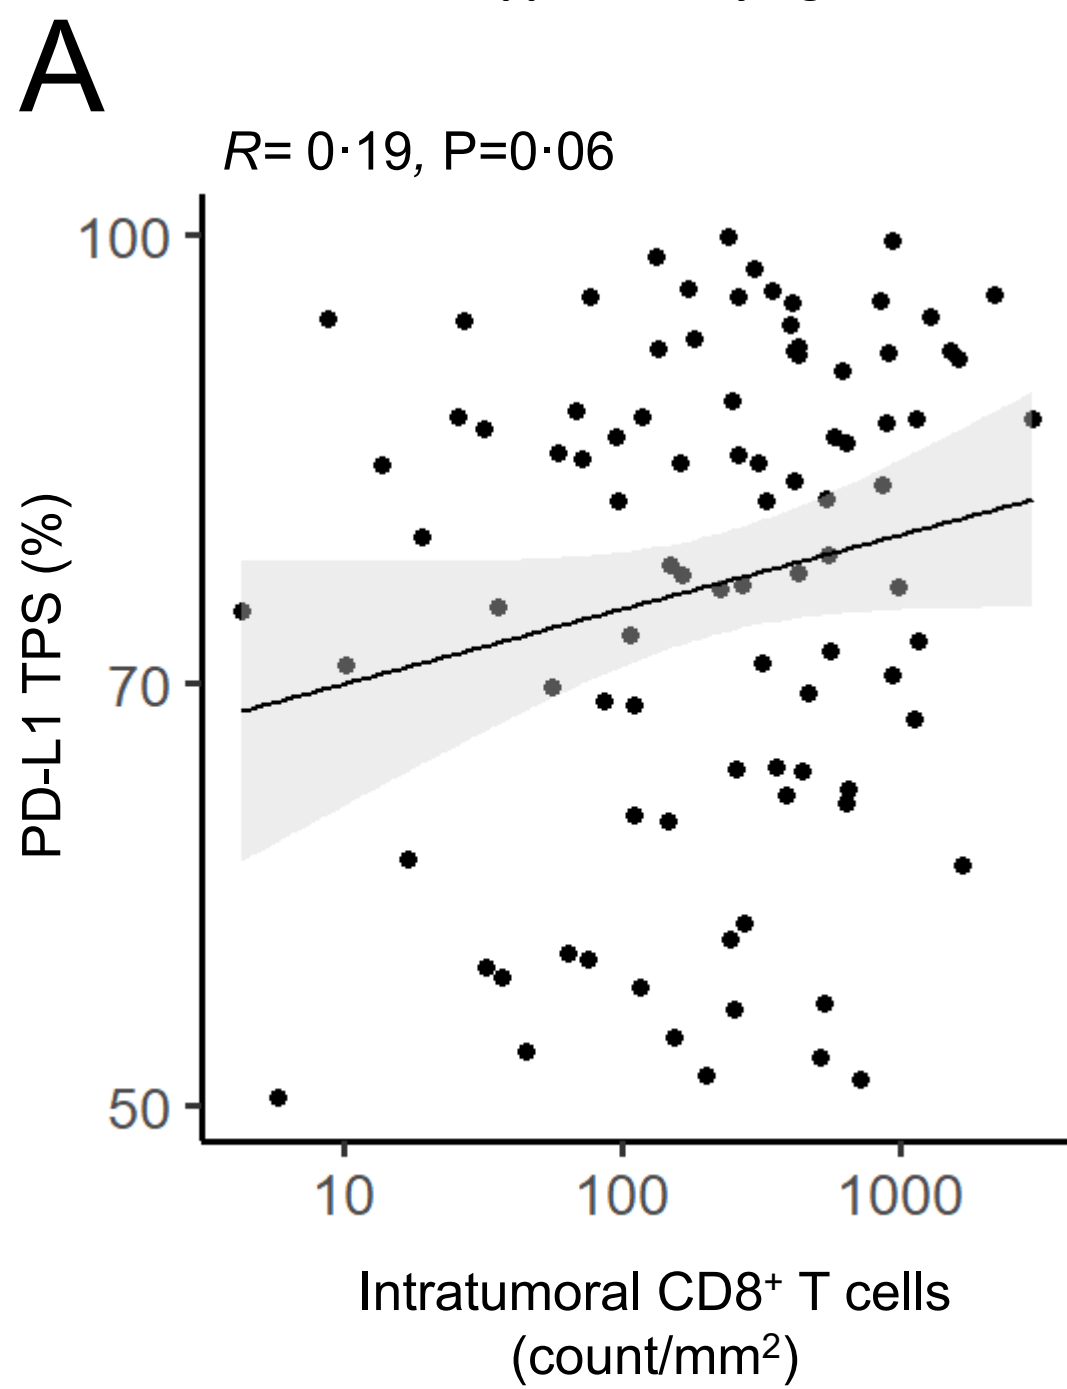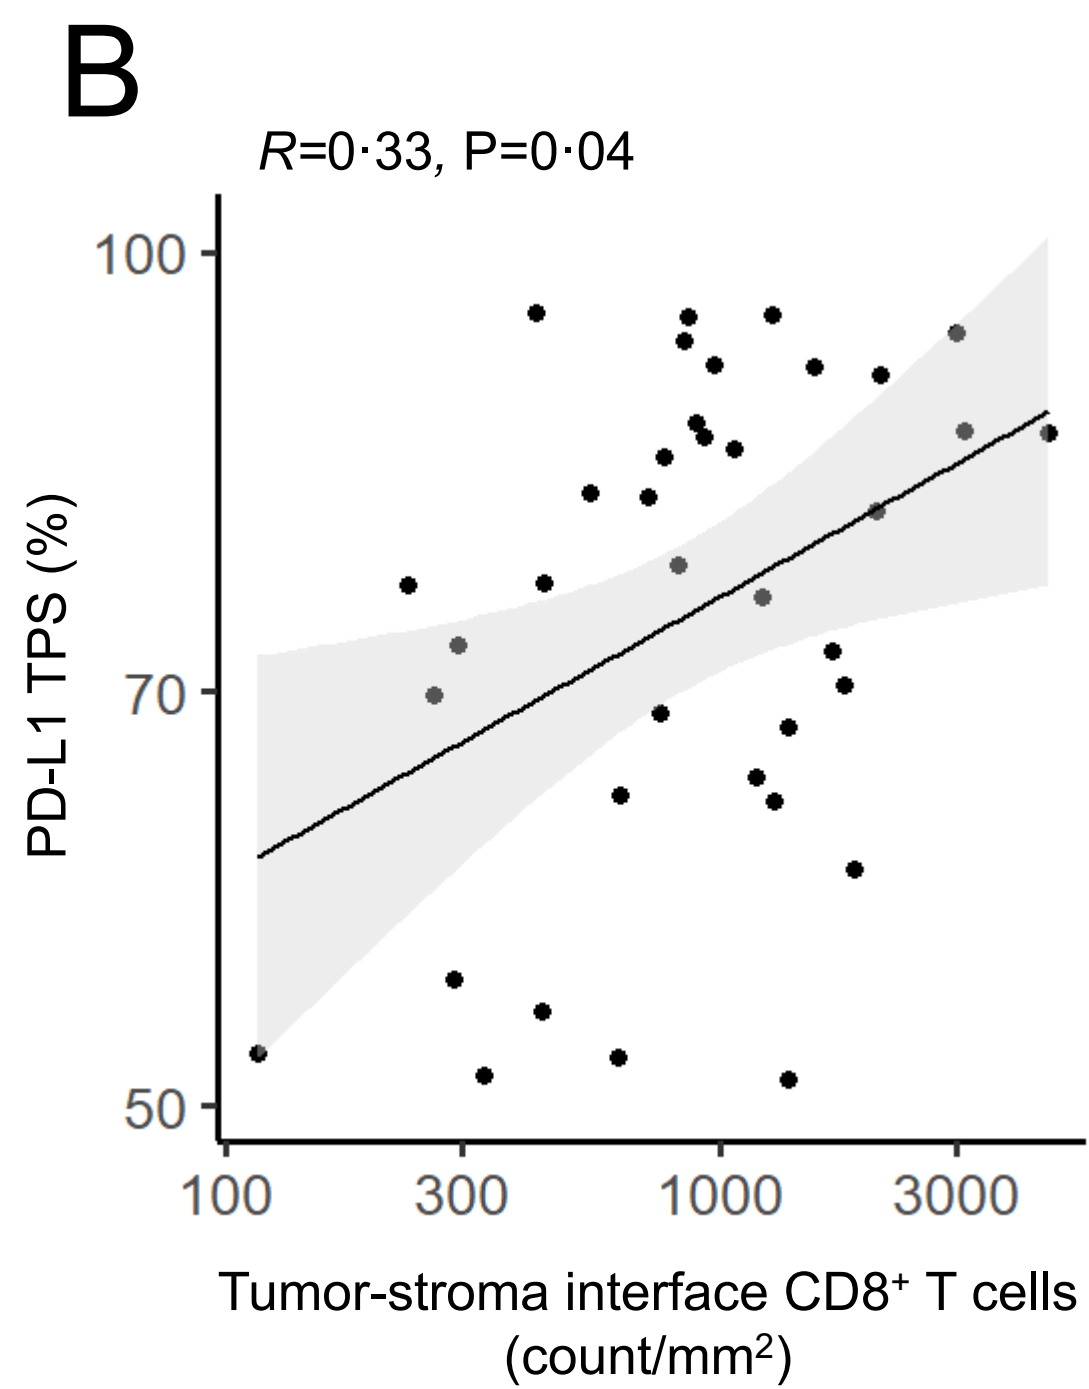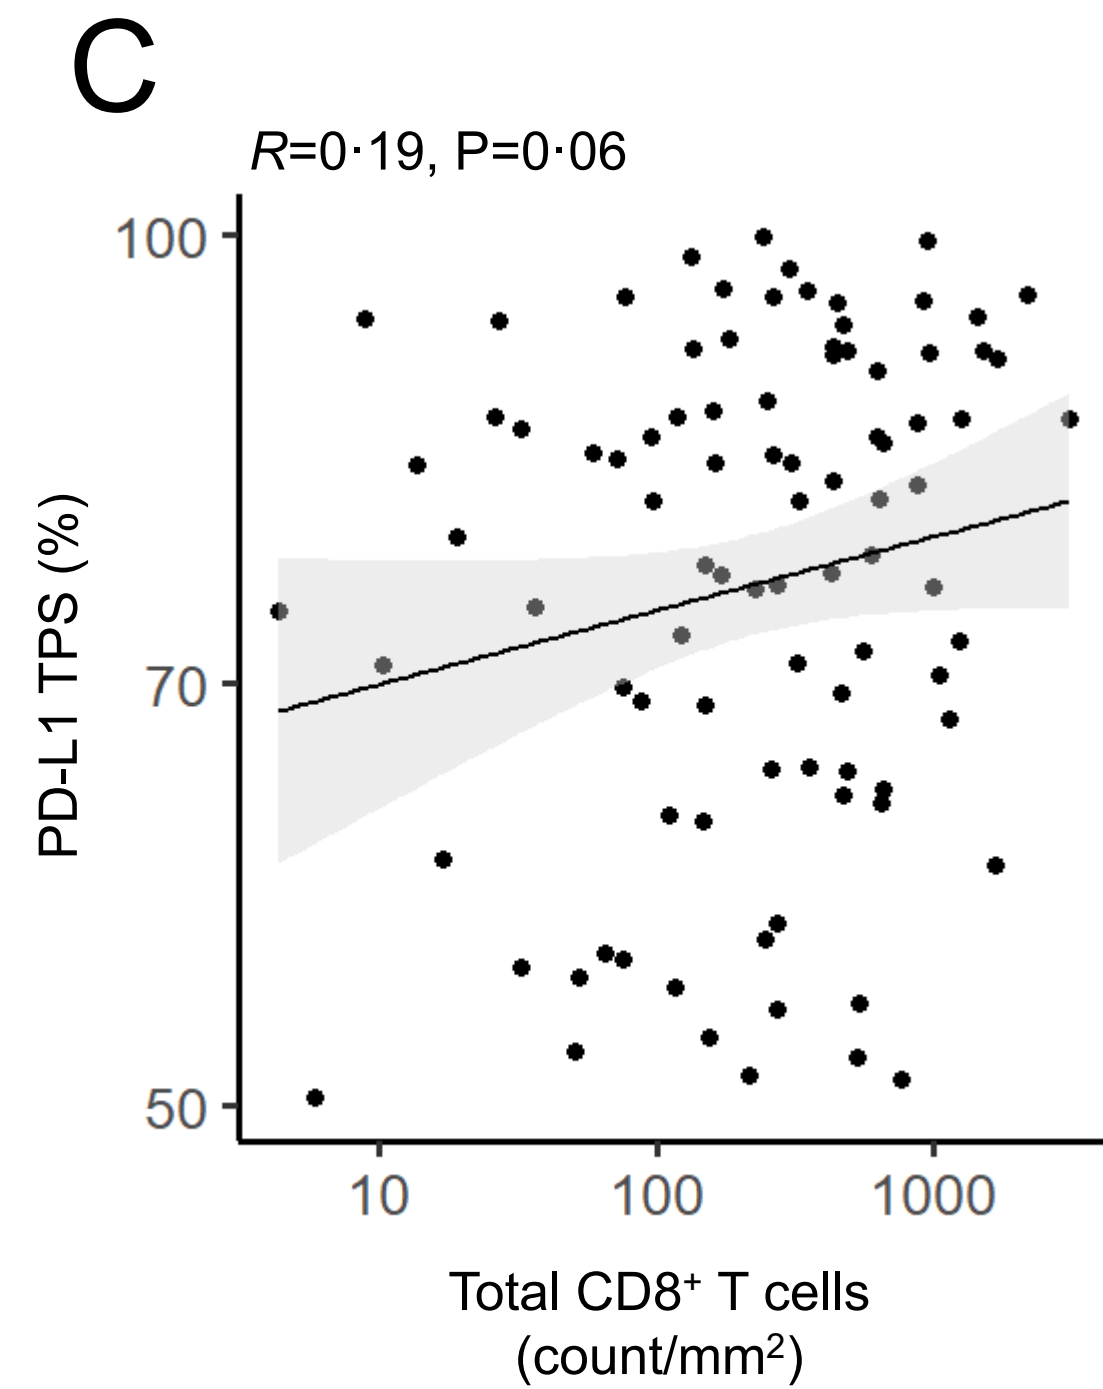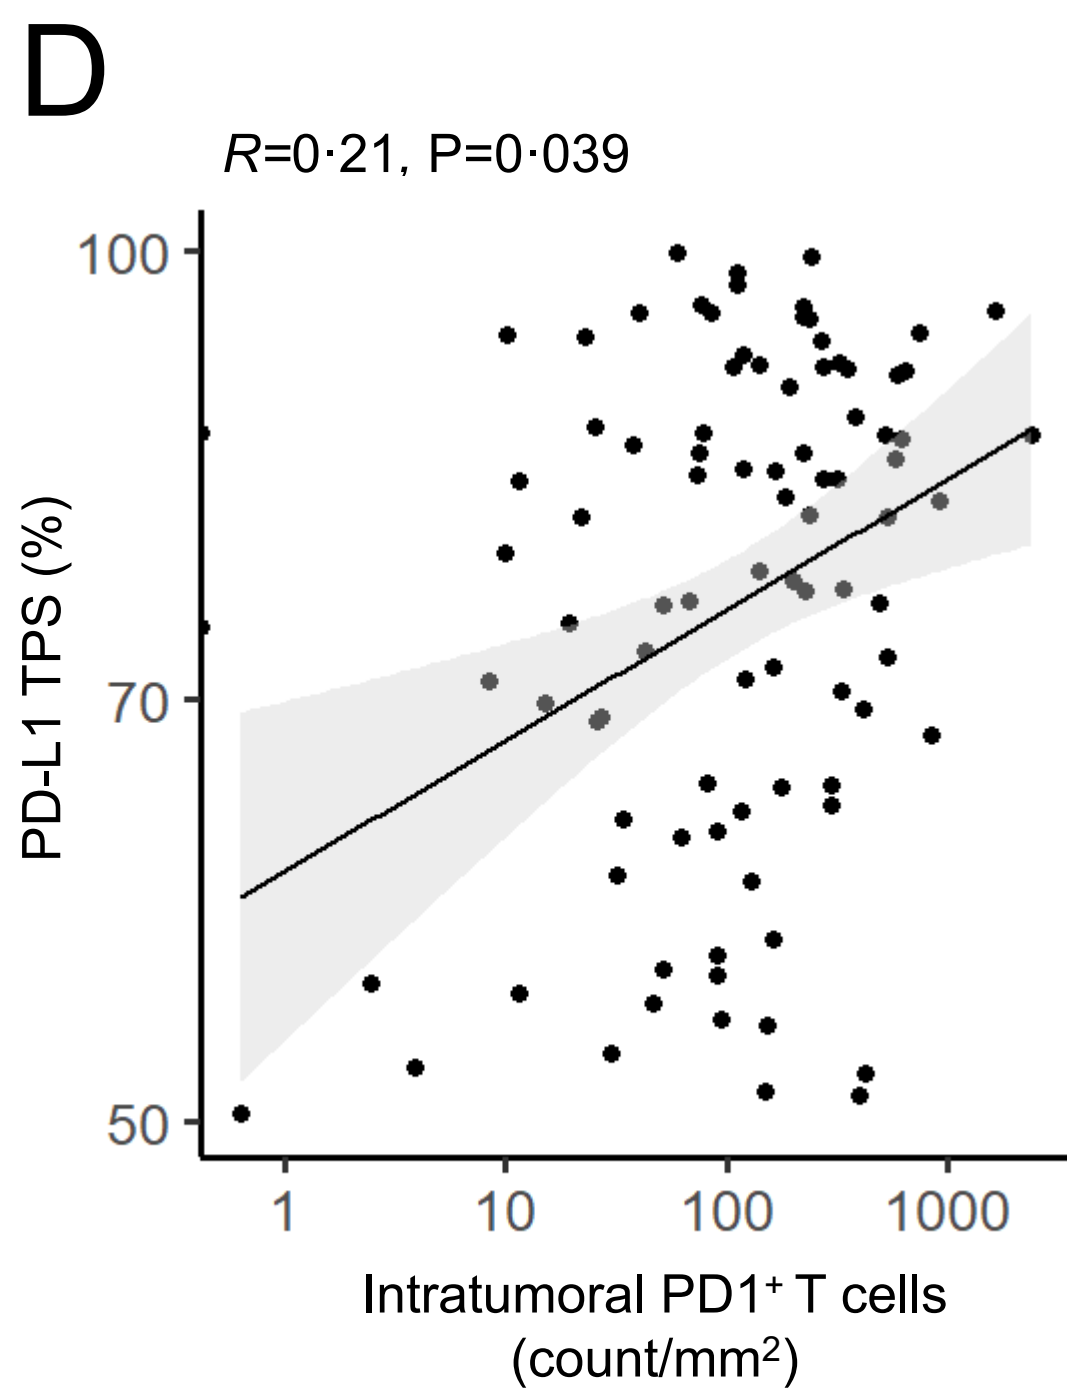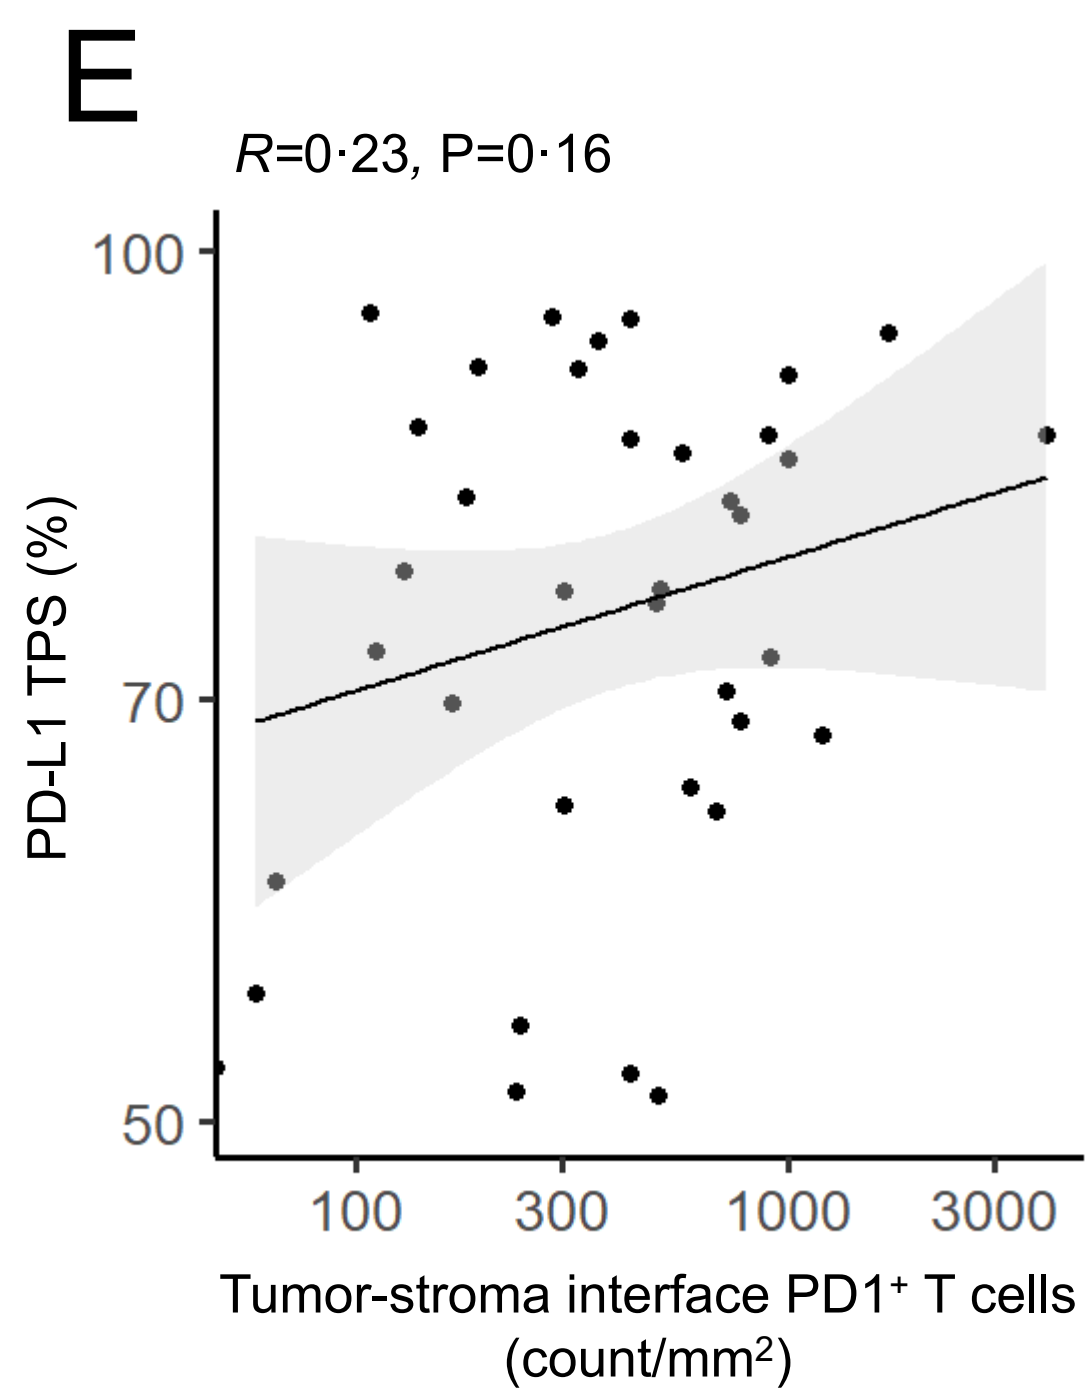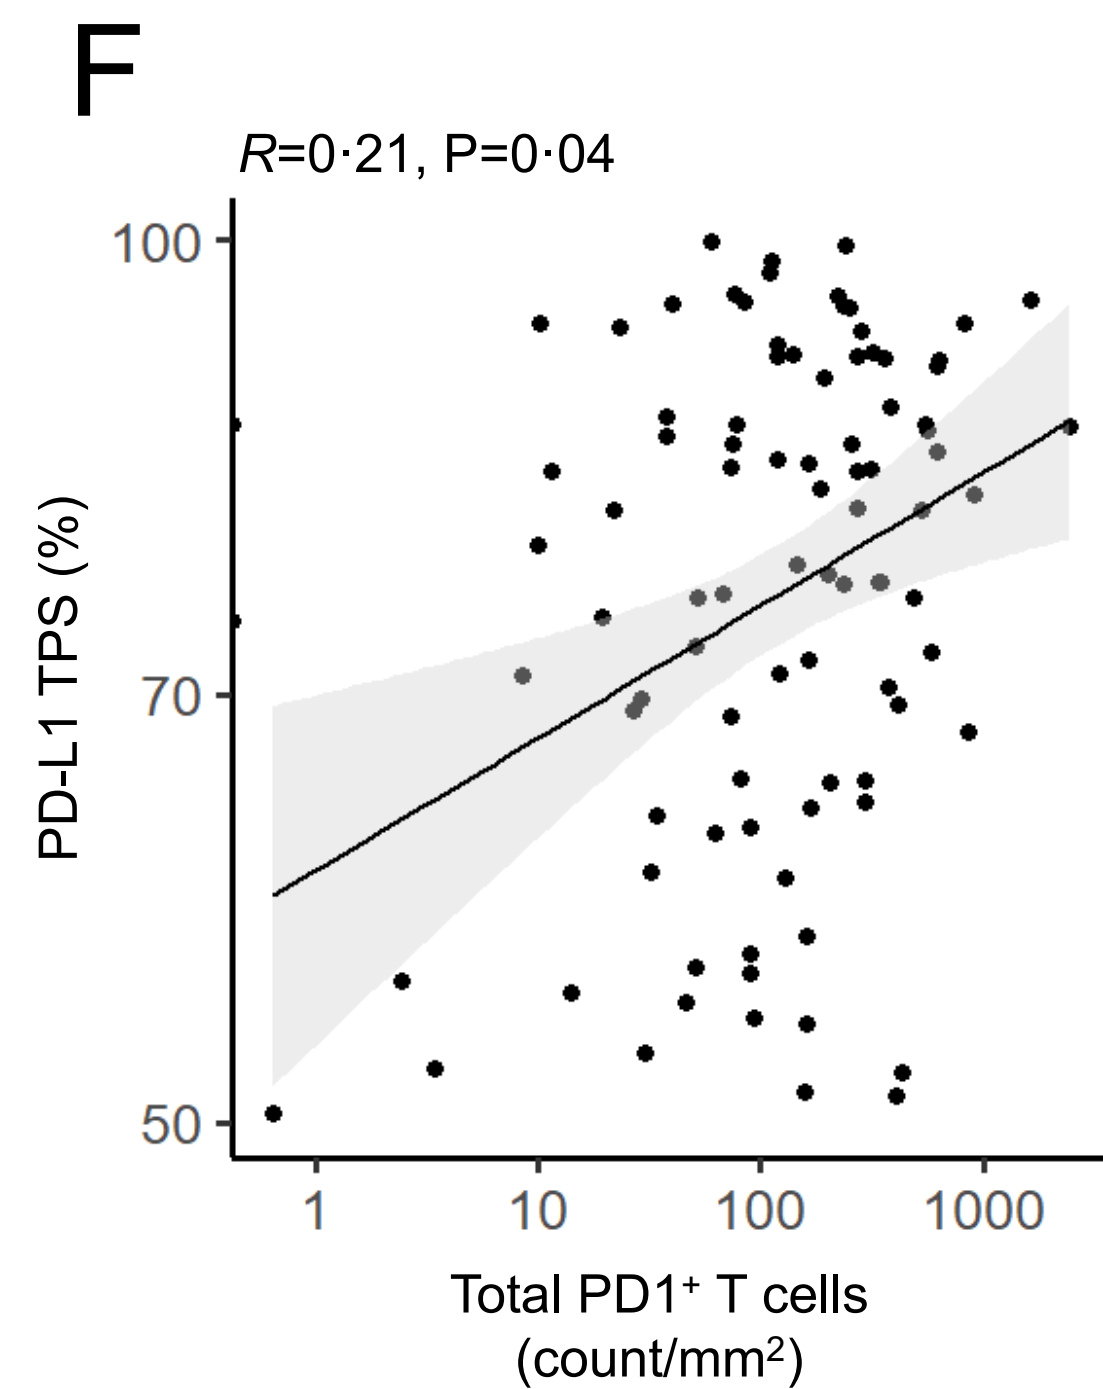

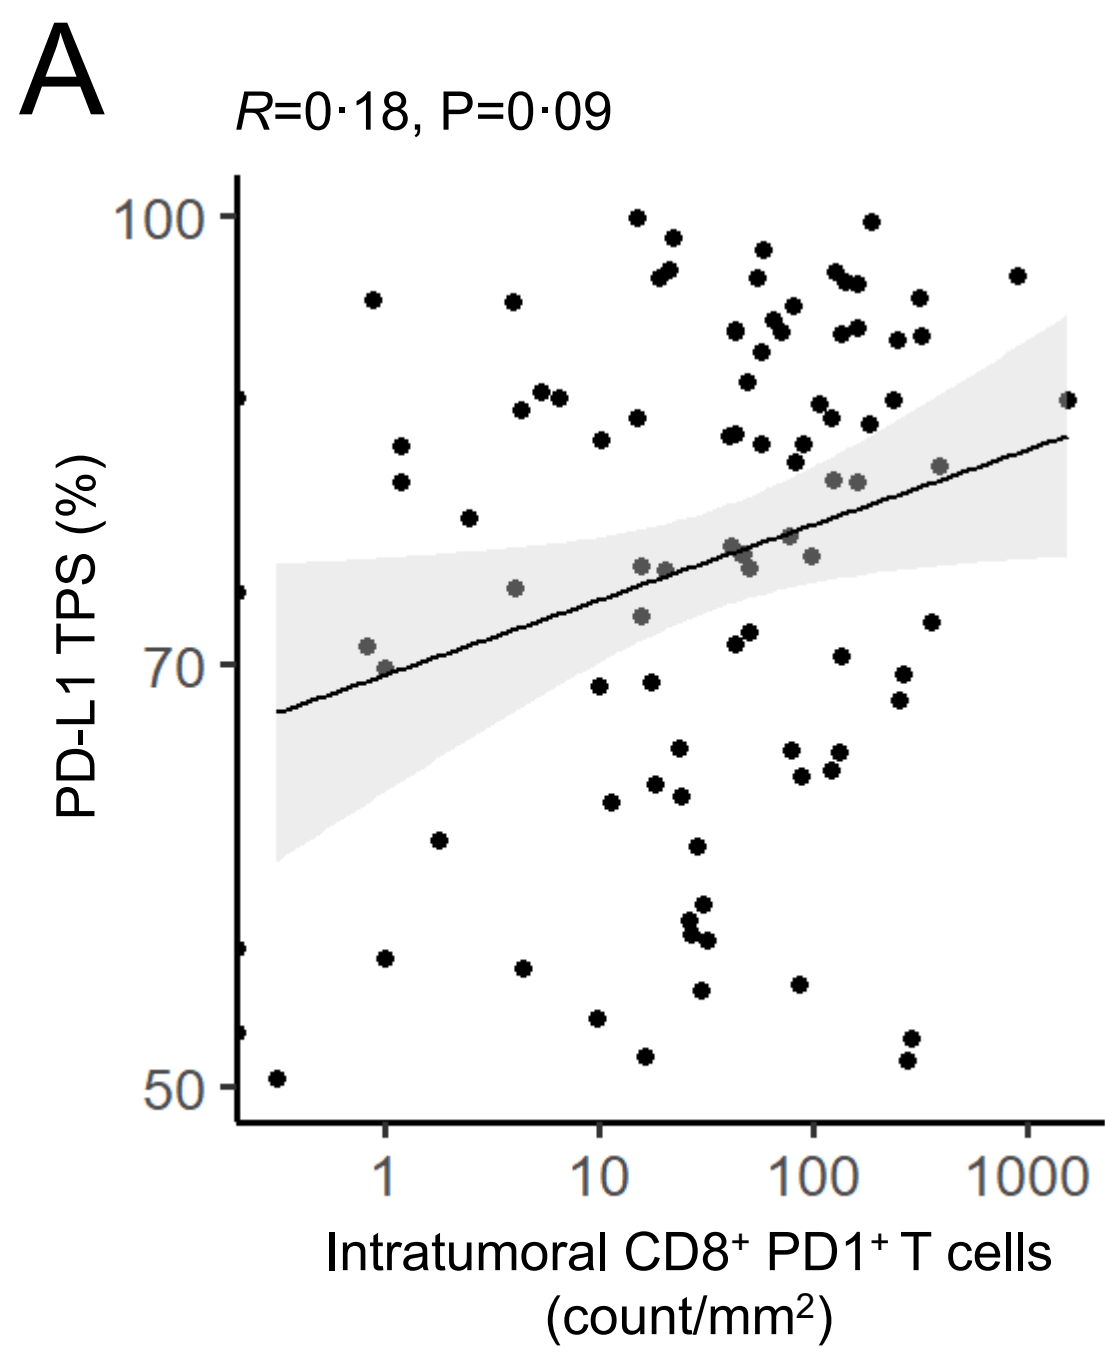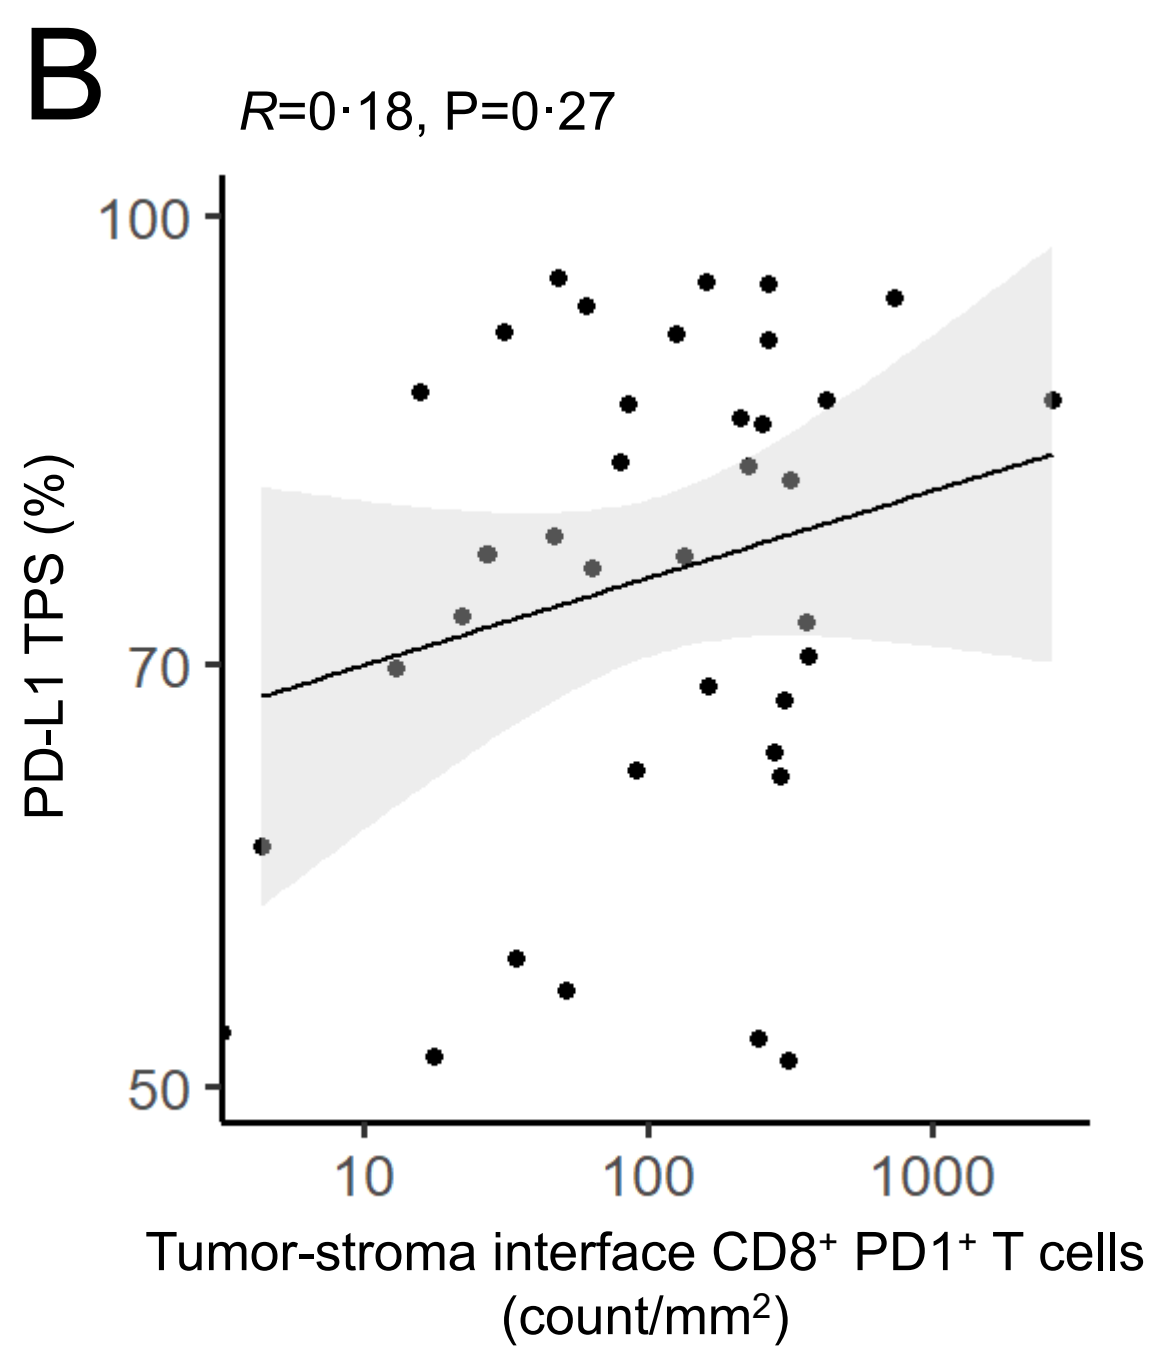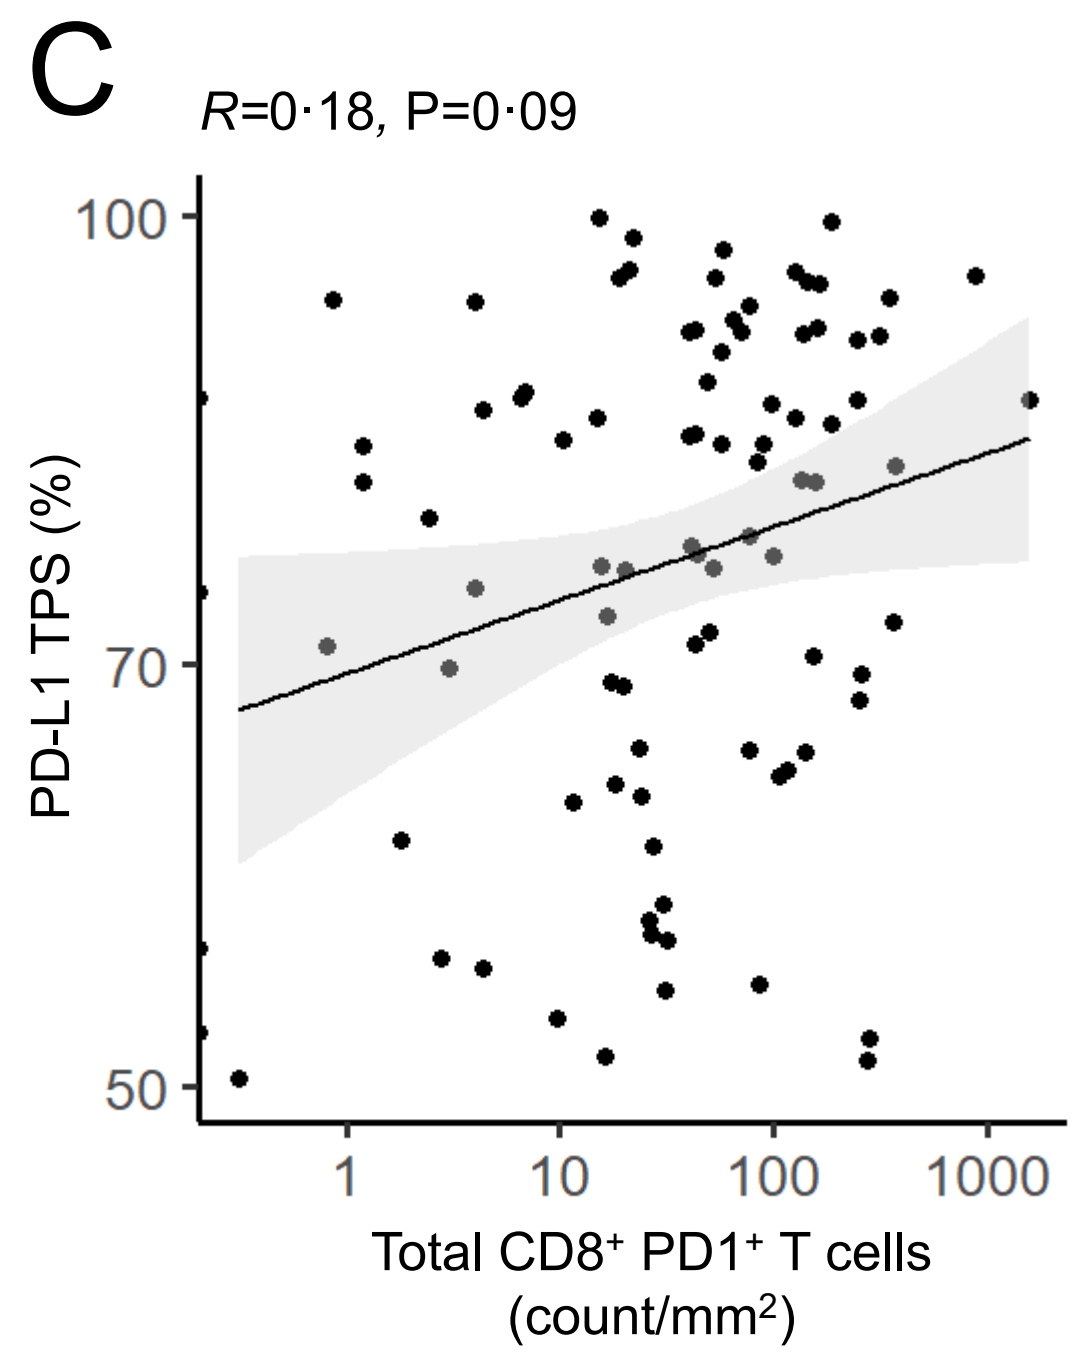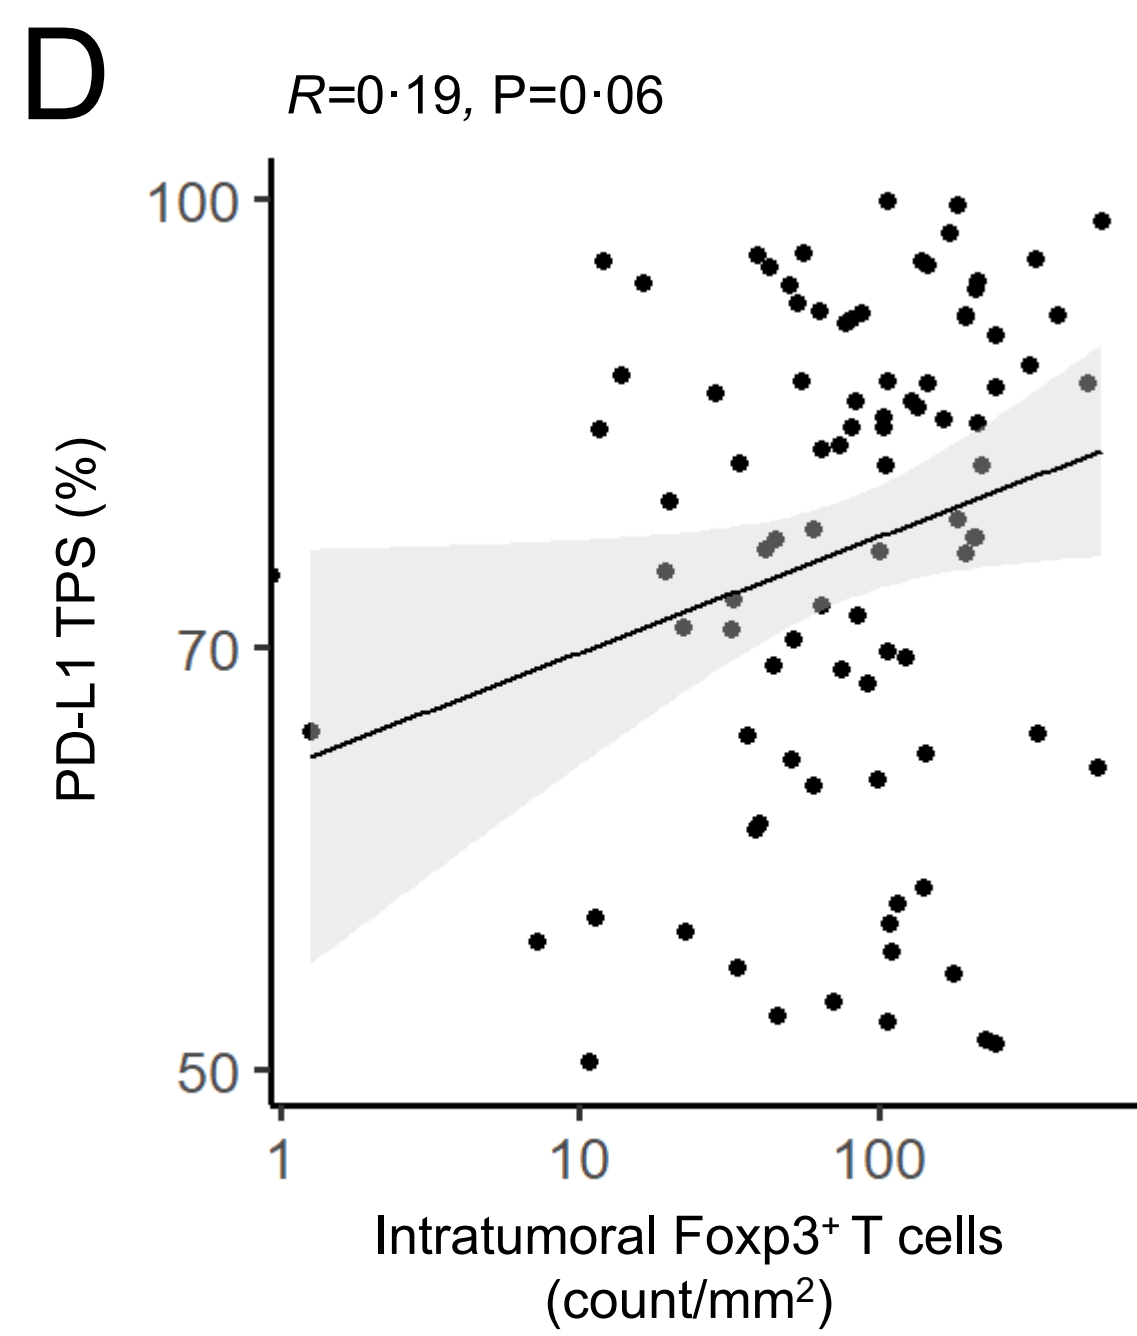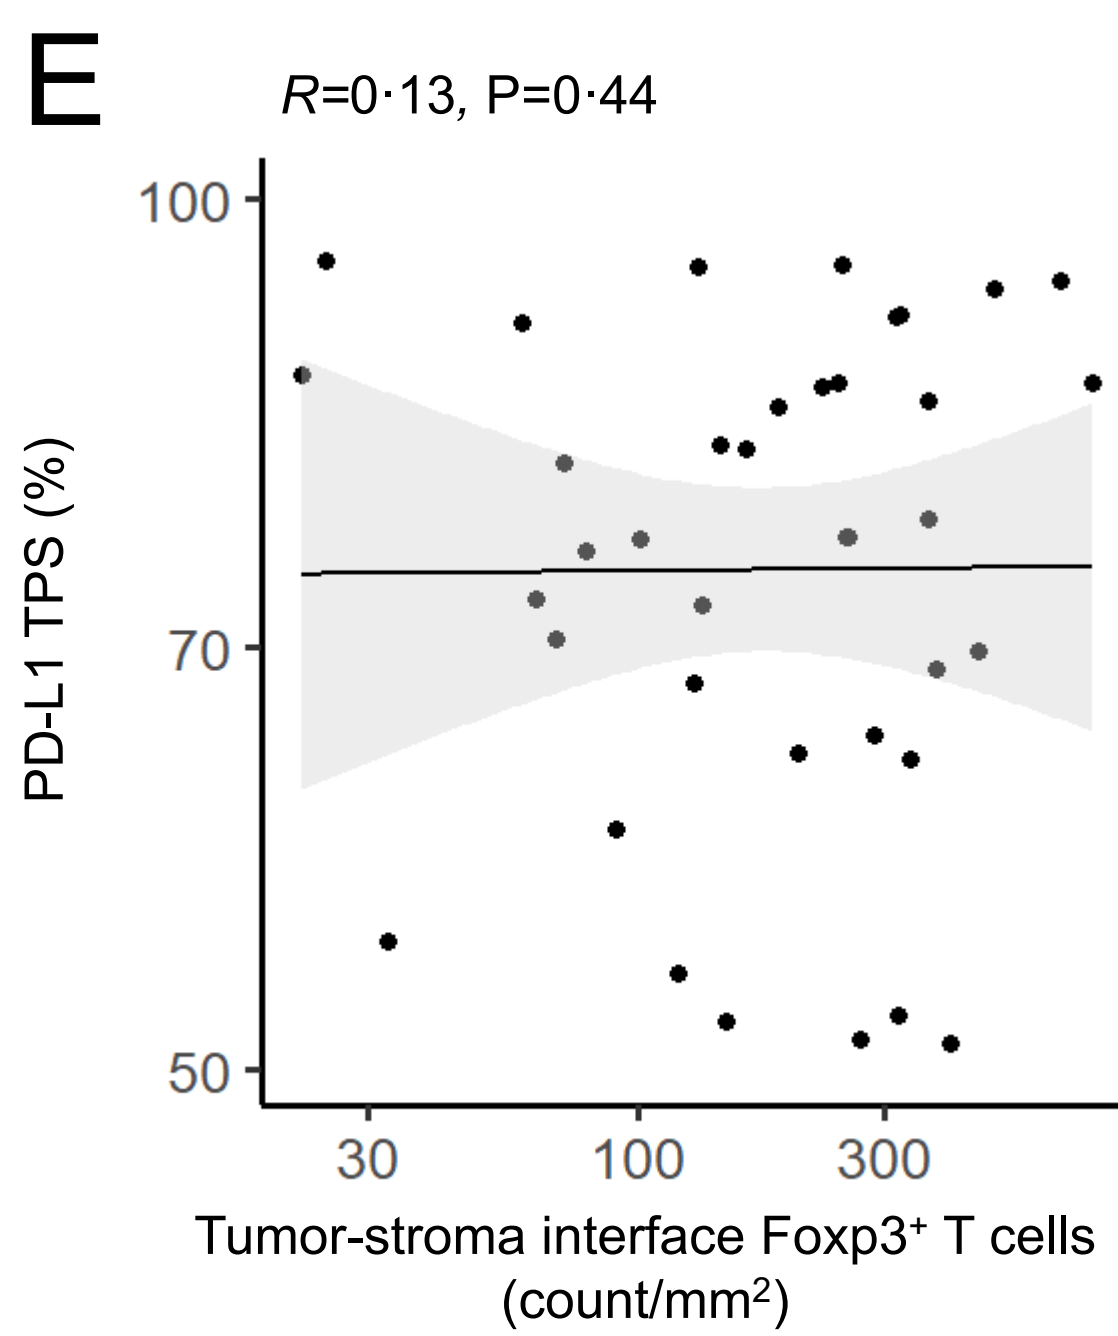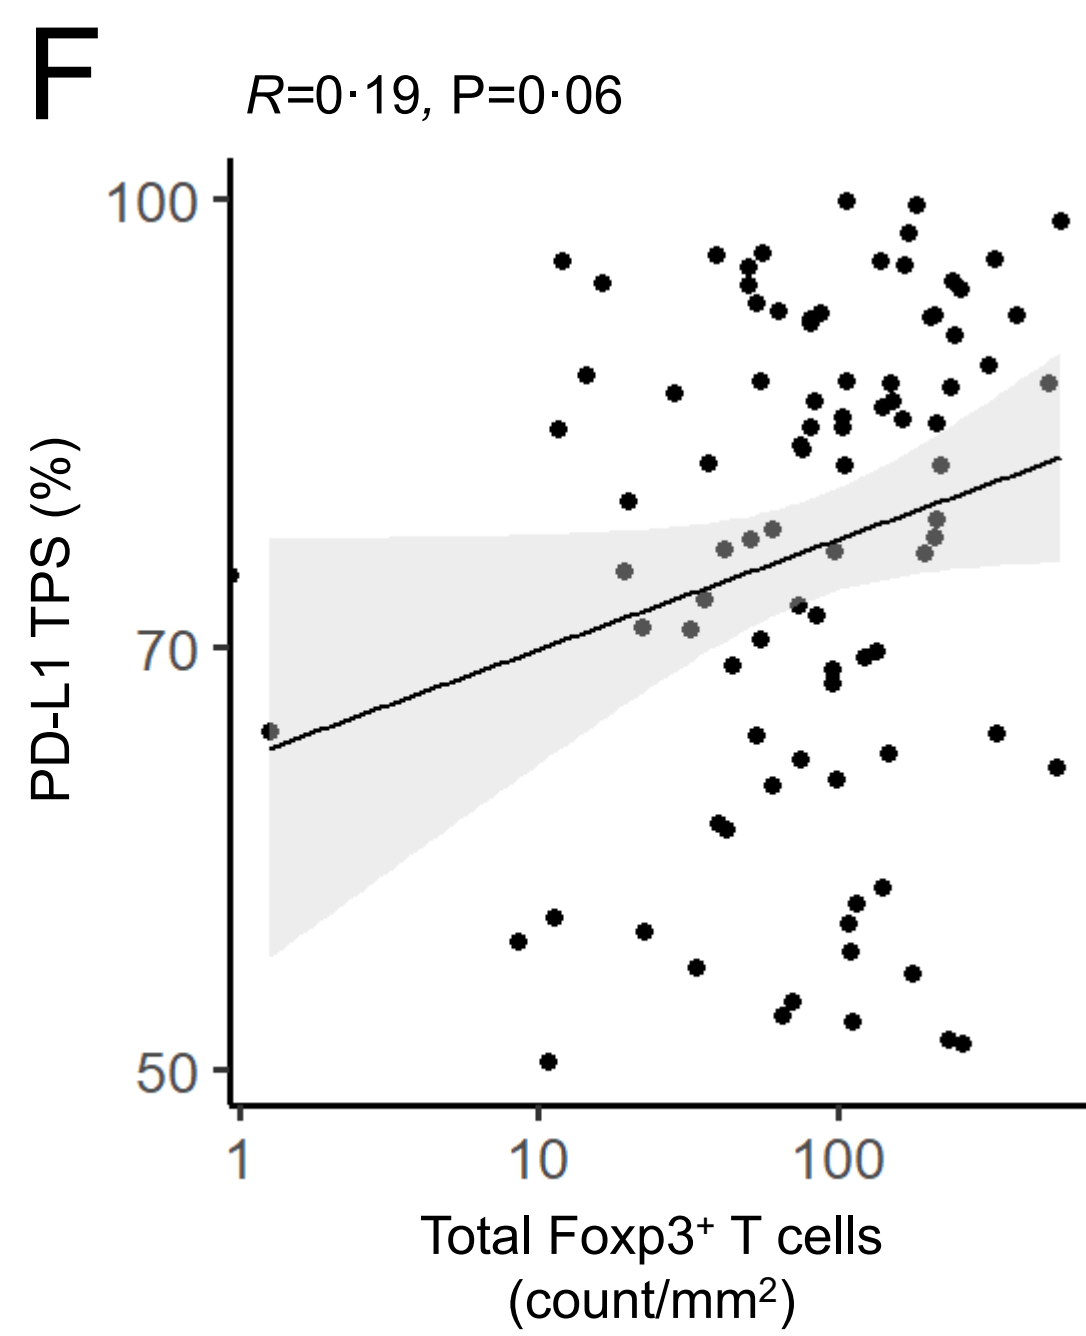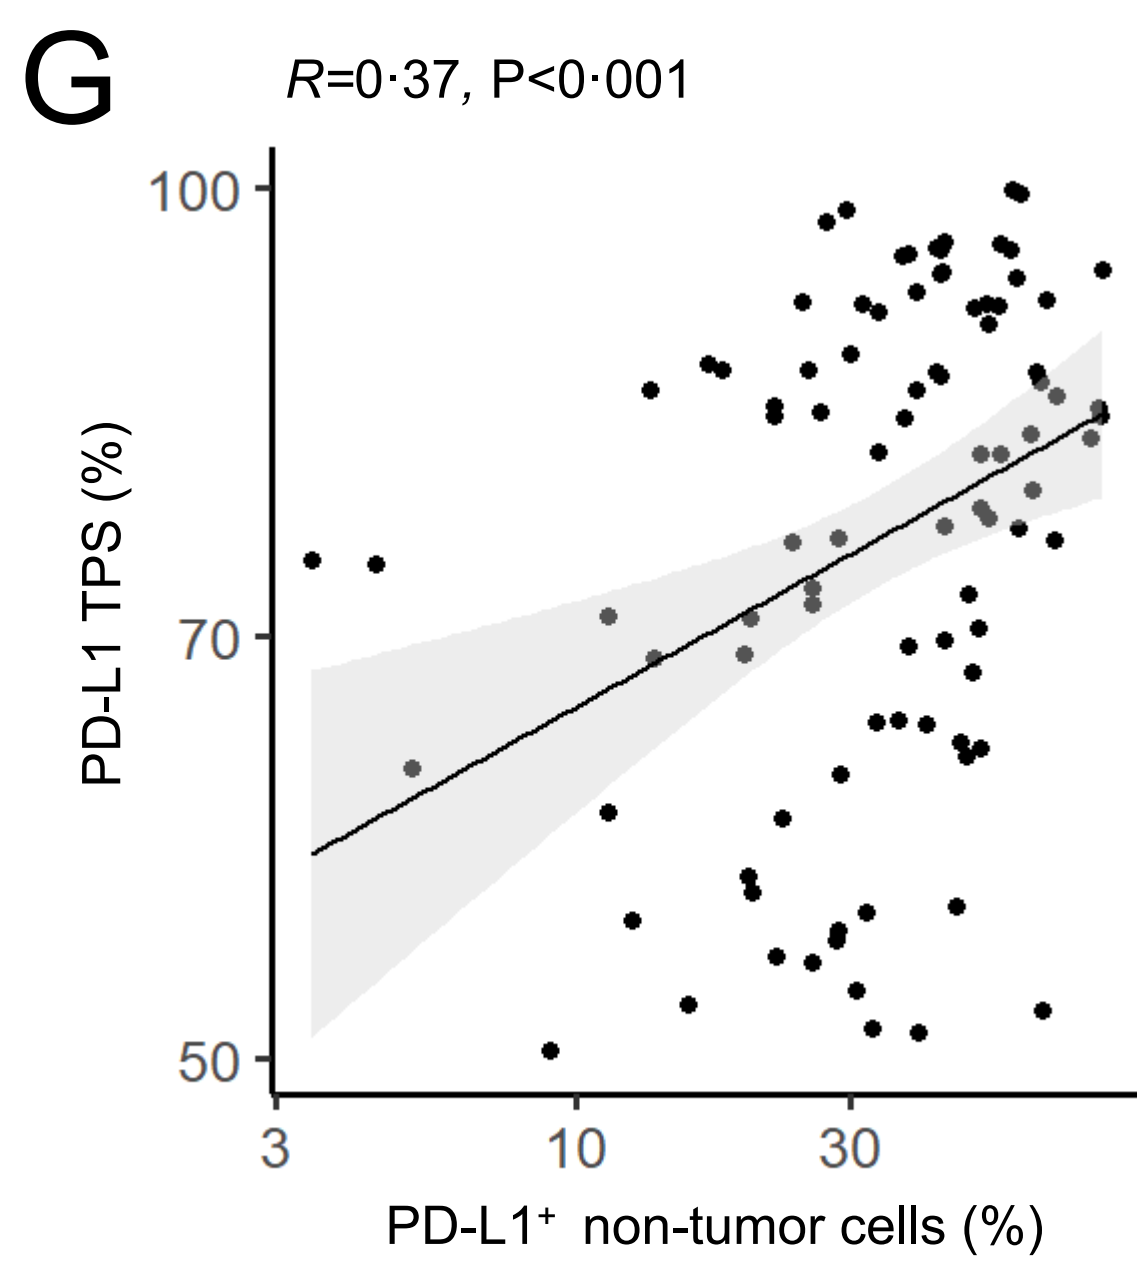

Supplementary Figure 13

**Supplementary Table 1.** Characteristics of 516 patients with advanced NSCLC who received first-line pembrolizumab in the retrospective, multi-center academic cohort.

| <b>Characteristic</b>              | <b>N=516 (%)</b> |
|------------------------------------|------------------|
| <b>Age</b> , median (range)        | 69 (30-93)       |
| <b>Sex</b>                         |                  |
| • Men                              | 245 (47.5)       |
| • Women                            | 271 (52.5)       |
| <b>Smoking history</b>             |                  |
| • Ever                             | 473 (91.7)       |
| • Never                            | 43 (8.3)         |
| <b>Pack/years</b> , median (range) | 30 (0-208)       |
| <b>Histology</b>                   |                  |
| • Non-squamous                     | 440 (85.3)       |
| • Squamous                         | 76 (14.7)        |
| <b>ECOG PS</b>                     |                  |
| • 0-1                              | 416 (80.6)       |
| • ≥2                               | 100 (19.4)       |
| <b>Driver</b>                      |                  |
| • KRAS                             | 191 (46.1)       |
| • BRAF                             | 21 (5.1)         |
| • MET                              | 14 (3.4)         |
| • RET                              | 1 (0.2)          |
| • None identified                  | 187 (45.2)       |
| • Not assessed                     | 102              |
| <b>PD-L1 TPS</b>                   |                  |
| • 50-89%                           | 319 (61.8)       |
| • ≥90%                             | 197 (38.2)       |
| <b>Institution</b>                 |                  |
| • MSKCC                            | 225 (43.6)       |
| • DFCI                             | 161 (31.2)       |
| • MGH                              | 67 (13.0)        |
| • MDACC                            | 63 (12.2)        |

ECOG PS, Eastern Cooperative Oncology Group Performance Status

**Supplementary Table 2.** Characteristics of 565 patients with advanced NSCLC who received first-line cemiplimab or chemotherapy in the prospective EMPOWER-Lung-01 phase III, randomized clinical trial.

| <b>Characteristic</b>            | <b>Cemiplimab arm<br/>N=284 (%)</b> | <b>Chemotherapy arm<br/>N=281 (%)</b> |
|----------------------------------|-------------------------------------|---------------------------------------|
| <b>Age, median (range)</b>       | 63 (31-79)                          | 64 (40-84)                            |
| <b>Sex</b>                       |                                     |                                       |
| • Men                            | 249 (87.7)                          | 231 (82.2)                            |
| • Women                          | 35 (12.3)                           | 50 (17.8)                             |
| <b>Histology</b>                 |                                     |                                       |
| • Non-squamous                   | 161 (56.7)                          | 159 (56.6)                            |
| • Squamous                       | 123 (43.3)                          | 122 (43.4)                            |
| <b>ECOG PS</b>                   |                                     |                                       |
| • 0                              | 77 (27.1)                           | 76 (27.0)                             |
| • 1                              | 207 (72.9)                          | 205 (73.0)                            |
| <b>Region of enrollment</b>      |                                     |                                       |
| • Europe                         | 216 (76.1)                          | 217 (77.2)                            |
| • Asia                           | 31 (10.9)                           | 29 (10.3)                             |
| • Rest of the world              | 37 (13.0)                           | 35 (12.5)                             |
| <b>Smoking status</b>            |                                     |                                       |
| • Current                        | 106 (37.3)                          | 92 (32.7)                             |
| • Former                         | 178 (62.7)                          | 189 (67.3)                            |
| <b>Cancer stage at screening</b> |                                     |                                       |
| • IIIB/C                         | 45 (15.8)                           | 42 (15.0)                             |
| • IV                             | 239 (84.2)                          | 239 (85.0)                            |
| <b>PD-L1 TPS</b>                 |                                     |                                       |
| • 50-89%                         | 185 (65.1)                          | 186 (66.2)                            |
| • ≥90%                           | 99 (34.9)                           | 95 (33.8)                             |

ECOG PS, Eastern Cooperative Oncology Group Performance Status

**Supplementary Table 3.** Characteristics of patients with advanced NSCLC who received first-line pembrolizumab according to PD-L1 expression levels (50-89% versus  $\geq 90\%$ ).

| <b>Characteristics</b>             | <b>PD-L1 TPS 50-89%<br/>N=319</b> | <b>PD-L1 TPS <math>\geq 90\%</math><br/>N=197</b> | <b>P</b> |
|------------------------------------|-----------------------------------|---------------------------------------------------|----------|
| <b>Age</b> , median (range)        | 69 (35-93)                        | 69 (30-88)                                        | 0.71     |
| <b>Sex</b>                         |                                   |                                                   |          |
| • Male                             | 158 (49.5)                        | 87 (44.2)                                         | 0.24     |
| • Female                           | 161 (50.5)                        | 110 (55.8)                                        |          |
| <b>Smoking history</b>             |                                   |                                                   |          |
| • Ever                             | 286 (89.7)                        | 187 (94.9)                                        | 0.047    |
| • Never                            | 33 (10.3)                         | 10 (5.1)                                          |          |
| <b>Pack/years</b> , median (range) | 33.8 (0-200)                      | 30 (0-208)                                        | 0.87     |
| <b>Histology</b>                   |                                   |                                                   |          |
| • Non-squamous                     | 266 (83.4)                        | 174 (88.3)                                        | 0.16     |
| • Squamous                         | 53 (16.6)                         | 23 (11.7)                                         |          |
| <b>ECOG PS</b>                     |                                   |                                                   |          |
| • 0-1                              | 257 (80.6)                        | 159 (80.7)                                        | 0.99     |
| • $\geq 2$                         | 62 (19.4)                         | 38 (19.3)                                         |          |
| <b>Driver</b>                      |                                   |                                                   |          |
| • KRAS                             | 110 (44.5)                        | 81 (48.5)                                         | 0.34     |
| • BRAF                             | 14 (5.7)                          | 7 (4.2)                                           |          |
| • MET                              | 6 (2.4)                           | 8 (4.8)                                           |          |
| • RET                              | 0 (0.0)                           | 1 (0.6)                                           |          |
| • None identified                  | 117 (47.4)                        | 70 (41.9)                                         |          |
| • Not assessed                     | 72                                | 30                                                |          |

PS ECOG, Performance Status Eastern Cooperative Oncology Group



**Supplementary Table 4.** Multivariable Cox regression for progression-free and overall survival in the first-line pembrolizumab cohort.

| <b>Variable</b>                          | <b>Progression-free survival</b> | <b>Overall survival</b>      |
|------------------------------------------|----------------------------------|------------------------------|
|                                          | Multivariable HR [95% CI], P     | Multivariable HR [95% CI], P |
| Age*                                     | 1.00 [0.99-1.01], 0.66           | 1.01 [1.00-1.02], 0.002      |
| Sex (male versus female)                 | 1.00 [0.81-1.23], 0.98           | 0.98 [0.78-1.24], 0.89       |
| ECOG PS (≥2 versus 0-1)                  | 1.37 [1.07-1.77], 0.01           | 1.78 [1.36-2.33], <0.0001    |
| Histology (squamous versus non-squamous) | 0.99 [0.75-1.32], 0.99           | 1.29 [0.95-1.75], 0.09       |
| Smoking history (never versus ever)      | 1.75 [1.24-2.46], 0.001          | 1.32 [0.90-1.95], 0.14       |
| PD-L1 TPS (≥90% versus 50-89%)           | 0.70 [0.57-0.87], 0.001          | 0.73 [0.58-0.93], 0.01       |

ECOG PS, Eastern Cooperative Oncology Group Performance Status

\*Age is included in the regression model as a continuous variable

**Supplementary Table 5.** Multivariable Cox regression for progression-free and overall survival to pembrolizumab in the propensity-score matched cohort.

| <b>Variable</b>                          | <b>Progression-free survival</b> | <b>Overall survival</b>      |
|------------------------------------------|----------------------------------|------------------------------|
|                                          | Multivariable HR [95% CI], P     | Multivariable HR [95% CI], P |
| Age*                                     | 1.00 [0.99-1.01], 0.32           | 1.01 [1.00-1.03], 0.007      |
| Sex (male versus female)                 | 1.02 [0.80-1.29], 0.86           | 0.95 [0.73-1.25], 0.75       |
| ECOG PS ( $\geq 2$ versus 0-1)           | 1.44 [1.08-1.90], 0.01           | 1.76 [1.30-2.39], <0.001     |
| Histology (squamous versus non-squamous) | 1.05 [0.72-1.53], 0.79           | 1.38 [0.92-2.05], 0.11       |
| Smoking history (never versus ever)      | 1.99 [1.21-3.29], 0.006          | 1.44 [0.83-2.50], 0.19       |
| PD-L1 TPS ( $\geq 90\%$ versus 50-89%)   | 0.72 [0.58-0.91], 0.007          | 0.75 [0.58-0.97], 0.03       |

ECOG PS, Eastern Cooperative Oncology Group Performance Status

\*Age is included in the regression model as a continuous variable

**Supplementary Table 6.** Characteristics of 284 patients with advanced NSCLC who received first-line cemiplimab in the EMPOWER-Lung 1 trial by PD-L1 expression levels.

| <b>Characteristic*</b>      | <b>PD-L1 TPS 50-89%<br/>N=185 (%)</b> | <b>PD-L1 TPS ≥90%<br/>N=99 (%)</b> | <b>P</b> |
|-----------------------------|---------------------------------------|------------------------------------|----------|
| <b>Age</b> , median (range) | 63 (31-79)                            | 64 (43-79)                         | 0·55     |
| <b>Sex</b>                  |                                       |                                    |          |
| • Male                      | 160 (86·5)                            | 89 (89·9)                          | 0·45     |
| • Female                    | 25 (13·5)                             | 10 (10·1)                          |          |
| <b>Histology</b>            |                                       |                                    |          |
| • Non-squamous              | 105 (56·8)                            | 56 (56·6)                          | 0·95     |
| • Squamous                  | 80 (43·2)                             | 43 (43·4)                          |          |
| <b>ECOG PS</b>              |                                       |                                    |          |
| • 0                         | 52 (28·1)                             | 25 (25·2)                          | 0·68     |
| • 1                         | 133 (71·9)                            | 74 (74·7)                          |          |
| <b>Smoking status</b>       |                                       |                                    |          |
| • Current                   | 73 (39·5)                             | 33 (33·3)                          | 0·37     |
| • Former                    | 112 (60·5)                            | 66 (66·7)                          |          |

\*Driver mutation status was not available for this cohort.

ECOG PS, Eastern Cooperative Oncology Group Performance Status

**Supplementary Table 7.** Characteristics of 281 patients with advanced NSCLC who received first-line platinum-based chemotherapy in the EMPOWER-Lung 1 phase III, randomized clinical trial by PD-L1 expression levels.

| <b>Characteristic*</b>     | <b>PD-L1 TPS 50-89%<br/>N=186 (%)</b> | <b>PD-L1 TPS ≥90%<br/>N=95 (%)</b> | <b>P</b> |
|----------------------------|---------------------------------------|------------------------------------|----------|
| <b>Age, median (range)</b> | 64 (40-81)                            | 35 (46-84)                         | 0·26     |
| <b>Sex</b>                 |                                       |                                    |          |
| • Male                     | 153 (82·3)                            | 78 (82·1)                          | 0·95     |
| • Female                   | 33 (17·7)                             | 17 (17·9)                          |          |
| <b>Histology</b>           |                                       |                                    |          |
| • Non-squamous             | 102 (54·8)                            | 57 (60·0)                          | 0·45     |
| • Squamous                 | 84 (45·2)                             | 38 (40·0)                          |          |
| <b>ECOG PS</b>             |                                       |                                    |          |
| • 0                        | 48 (25·8)                             | 28 (29·5)                          | 0·57     |
| • 1                        | 138 (74·2)                            | 67 (70·5)                          |          |
| <b>Smoking status</b>      |                                       |                                    |          |
| • Current                  | 65 (34·9)                             | 27 (28·4)                          | 0·29     |
| • Former                   | 121 (65·1)                            | 68 (71·6)                          |          |

\*Driver mutation status was not available for this cohort.

ECOG PS, Eastern Cooperative Oncology Group Performance Status

**Supplementary Table 8.** Baseline clinicopathologic characteristics of patients with non-small cell lung cancer with PD-L1 TPS 50-89% versus those with PD-L1 TPS  $\geq$ 90% whose tumors underwent comprehensive tumor genomic profiling at DFCI.

| Clinical Characteristic, n (%)     | PD-L1 TPS 50-89%<br>N=305 | PD-L1 TPS $\geq$ 90%<br>N=248 | P-value |
|------------------------------------|---------------------------|-------------------------------|---------|
| <b>Age, median (range)</b>         | 67 (29-98)                | 67 (27-90)                    | 0.90    |
| <b>Sex</b>                         |                           |                               | 0.79    |
| • Male                             | 118 (38.7%)               | 99 (39.9%)                    |         |
| • Female                           | 187 (61.3%)               | 149 (60.1%)                   |         |
| <b>Smoking status</b>              |                           |                               | 0.03    |
| • Current/Former                   | 243 (79.7%)               | 215 (86.7%)                   |         |
| • Never                            | 62 (20.3%)                | 33 (13.3%)                    |         |
| <b>Pack/Years, median (range)</b>  | 23 (0-200)                | 25 (0-120)                    | 0.16    |
| <b>Histology</b>                   |                           |                               | 1.0     |
| • Non-squamous                     | 283 (92.8%)               | 230 (92.7%)                   |         |
| • Squamous                         | 22 (7.2%)                 | 18 (7.6%)                     |         |
| <b>TMB, mut/Mb</b>                 | 9.9 (0-70.2)              | 10.9 (1.5-43.3)               | 0.22    |
| <b>Stage at time of sequencing</b> |                           |                               | 0.96    |
| • I                                | 19 (6.23%)                | 16 (6.45%)                    |         |
| • II                               | 11 (3.61%)                | 7 (2.82%)                     |         |
| • III                              | 32 (10.5%)                | 26 (10.5%)                    |         |
| • IV                               | 243 (79.7%)               | 199 (80.2%)                   |         |

**Supplementary Table 9.** Baseline clinicopathologic characteristics of patients with non-small cell lung cancer with PD-L1 TPS 50-89% vs ≥90% whose tumors underwent multiplexed immunofluorescence at DFCI.

| <b>Clinical Characteristic, n (%)</b> | <b>PD-L1 TPS 50-89%<br/>N=69</b> | <b>PD-L1 TPS ≥90%<br/>N=24</b> | <b>P-value</b> |
|---------------------------------------|----------------------------------|--------------------------------|----------------|
| <b>Age, median (range)</b>            | 68 (29-85)                       | 71 (28-85)                     | 0.33           |
| <b>Sex</b>                            |                                  |                                | 0.63           |
| • Male                                | 44 (63.8%)                       | 14 (58.3%)                     |                |
| • Female                              | 25 (36.2%)                       | 10 (41.7%)                     |                |
| <b>Smoking status</b>                 |                                  |                                | 1              |
| • Current/Former                      | 57 (82.6%)                       | 21 (87.5%)                     |                |
| • Never                               | 11 (15.9%)                       | 3 (12.5%)                      |                |
| • Not available                       | 1                                |                                |                |
| <b>Pack-years, median (range)</b>     | 32.5 (3-90)                      | 40 (15-122)                    | 0.31           |
| <b>Histology</b>                      |                                  |                                | 0.55           |
| • Nonsquamous                         | 58 (84.1%)                       | 19 (79.2%)                     |                |
| • Squamous                            | 11 (15.9%)                       | 5 (20.8%)                      |                |
| <b>Stage at ImmunoProfile</b>         |                                  |                                | 0.43           |
| • I                                   | 17 (24.6%)                       | 3 (12.5%)                      |                |
| • II                                  | 8 (11.6%)                        | 3 (12.5%)                      |                |
| • III                                 | 10 (14.5%)                       | 2 (8.3%)                       |                |
| • IV                                  | 34 (49.3%)                       | 16 (66.7%)                     |                |
| <b>Site of biopsy</b>                 |                                  |                                | 0.80           |
| • Primary lung tissue                 | 46 (66.7%)                       | 15 (62.5%)                     |                |
| • Metastatic tissue                   | 23 (33.3%)                       | 9 (37.5%)                      |                |
